# Supplementary material for: Sulfide synthesis through copper-catalyzed C–S bond formation under biomolecule-compatible conditions
Source: Royal Society of Chemistry journal article supplement (doi:10.1039/c4cc08367a), 2014-11-24

## Supporting Information

### **Sulfide Synthesis through Copper-Catalyzed C-S Bonds Formation under Biomolecule-Compatible Conditions**

Yonghong Zhang,<sup>†</sup> Yiming Li,<sup>†</sup> Xiaomei Zhang and Xuefeng Jiang<sup>\*,†</sup>

<sup>†</sup>*Shanghai Key Laboratory of Green Chemistry and Chemical Process, Department of  
Chemistry, East China Normal University, 3663 North Zhongshan Road, Shanghai  
200062, P. R. China*

[xfjiang@chem.ecnu.edu.cn](mailto:xfjiang@chem.ecnu.edu.cn)

#### **Index**

|                                                                                              |               |
|----------------------------------------------------------------------------------------------|---------------|
| <b>I. General Information .....</b>                                                          | <b>S2</b>     |
| <b>II. Optimization of Reaction Conditions.....</b>                                          | <b>S3</b>     |
| <b>III. The Synthetic Procedure for Substrates.....</b>                                      | <b>S4</b>     |
| <b>IV. The Synthetic Procedure and Data for 2a-2y and 3a-3r.....</b>                         | <b>S5-32</b>  |
| <b>V. Gram Scale Experiments.....</b>                                                        | <b>S33-34</b> |
| <b>VI. Biomolecule-Compatibility Experiments.....</b>                                        | <b>S35</b>    |
| <b>VII. Mechanistic Study.....</b>                                                           | <b>S36</b>    |
| <b>VIII. Copies of the <sup>1</sup>H NMR, <sup>13</sup>C NMR and <sup>19</sup>F NMR.....</b> | <b>S37-86</b> |

## **I. General information**

Unless otherwise noted, all reagents were obtained commercially and used without further purification.

### **NMR spectrum:**

$^1\text{H}$  and  $^{13}\text{C}$  NMR spectra were collected on 400 MHz NMR spectrometers (Bruker AVANCE) using  $\text{CDCl}_3$  or  $\text{DMSO-}d_6$ . Chemical shifts are reported in parts per million (ppm). Chemical shifts for protons are reported in parts per million downfield and are referenced to residual protium in the NMR solvent ( $\text{CHCl}_3 = \delta 7.26$ ). Chemical shifts for carbon are reported in parts per million downfield and are referenced to the carbon resonances of the solvent ( $\text{CDCl}_3 = \delta 77.0$ ). Data are represented as follows: chemical shift, multiplicity (br = broad, s = singlet, d = doublet, t = triplet, q = quartet, m = multiplet), coupling constants in Hertz (Hz), integration.

### **Mass spectroscopy:**

Mass spectra were in general recorded on an AMD 402/3 or a HP 5989A mass selective detector.

### **Chromatography:**

Column chromatography was performed with silica gel (200-300 mesh ASTM).

### **IR:**

TENSOR (27) Series FT-IR Spectrometers.

## II. Optimization of Reaction Conditions

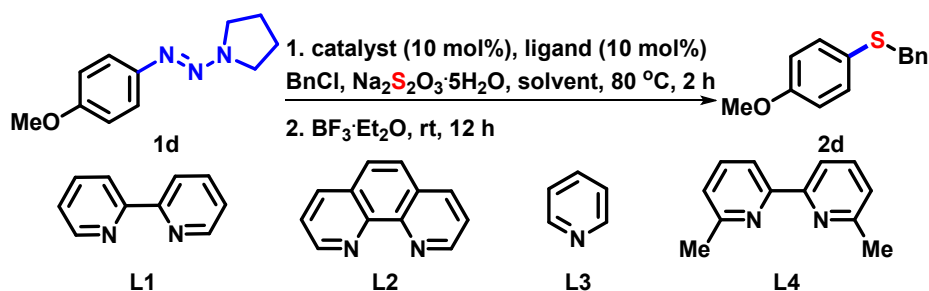

| entry     | catalyst                                | ligand    | promoter                              | solvent                      | yield (%) <sup>b</sup> |
|-----------|-----------------------------------------|-----------|---------------------------------------|------------------------------|------------------------|
| 1         | Pd <sub>2</sub> (dba) <sub>3</sub>      | L1        | BF <sub>3</sub> ·Et <sub>2</sub> O    | DMSO (2 mL)                  | 33                     |
| 2         | FeCl <sub>3</sub>                       | L1        | BF <sub>3</sub> ·Et <sub>2</sub> O    | MeOH/H <sub>2</sub> O        | 42                     |
| 3         | Cu(acac) <sub>2</sub>                   | L1        | BF <sub>3</sub> ·Et <sub>2</sub> O    | MeOH/H <sub>2</sub> O        | 59                     |
| 4         | CuSO <sub>4</sub> ·5H <sub>2</sub> O    | L1        | BF <sub>3</sub> ·Et <sub>2</sub> O    | MeOH/H <sub>2</sub> O        | 65                     |
| 5         | -                                       | -         | BF <sub>3</sub> ·Et <sub>2</sub> O    | MeOH/H <sub>2</sub> O        | 20                     |
| 6         | CuSO <sub>4</sub> ·5H <sub>2</sub> O    | L1        | -                                     | MeOH/H <sub>2</sub> O        | NR                     |
| 7         | CuSO <sub>4</sub> ·5H <sub>2</sub> O    | -         | BF <sub>3</sub> ·Et <sub>2</sub> O    | MeOH/H <sub>2</sub> O        | 46                     |
| 8         | CuSO <sub>4</sub> ·5H <sub>2</sub> O    | L2        | BF <sub>3</sub> ·Et <sub>2</sub> O    | MeOH/H <sub>2</sub> O        | 62                     |
| 9         | CuSO <sub>4</sub> ·5H <sub>2</sub> O    | L3        | BF <sub>3</sub> ·Et <sub>2</sub> O    | MeOH/H <sub>2</sub> O        | 37                     |
| 10        | CuSO <sub>4</sub> ·5H <sub>2</sub> O    | L4        | BF <sub>3</sub> ·Et <sub>2</sub> O    | MeOH/H <sub>2</sub> O        | 23                     |
| 11        | CuSO <sub>4</sub> ·5H <sub>2</sub> O    | L1        | BF <sub>3</sub> ·Et <sub>2</sub> O    | MeOH/H <sub>2</sub> O        | 66 <sup>c</sup>        |
| 12        | CuSO <sub>4</sub> ·5H <sub>2</sub> O    | L1        | BF <sub>3</sub> ·Et <sub>2</sub> O    | MeOH/H <sub>2</sub> O        | 54 <sup>d</sup>        |
| 13        | CuSO <sub>4</sub> ·5H <sub>2</sub> O    | L1        | BF <sub>3</sub> ·Et <sub>2</sub> O    | H <sub>2</sub> O (2 mL)      | 55                     |
| 14        | CuSO <sub>4</sub> ·5H <sub>2</sub> O    | L1        | BF <sub>3</sub> ·Et <sub>2</sub> O    | H <sub>2</sub> O (2 mL)      | 55 <sup>e</sup>        |
| <b>15</b> | <b>CuSO<sub>4</sub>·5H<sub>2</sub>O</b> | <b>L1</b> | <b>BF<sub>3</sub>·Et<sub>2</sub>O</b> | <b>H<sub>2</sub>O (1 mL)</b> | <b>88</b>              |
| 16        | CuSO <sub>4</sub> ·5H <sub>2</sub> O    | L1        | BF <sub>3</sub> ·Et <sub>2</sub> O    | -                            | Trace                  |
| 17        | CuSO <sub>4</sub> ·5H <sub>2</sub> O    | L1        | HBF <sub>4</sub>                      | H <sub>2</sub> O (1 mL)      | 82                     |

<sup>a</sup>Reaction conditions: catalyst (10 mol%), ligand (10 mol%), BnCl (1 mmol), Na<sub>2</sub>S<sub>2</sub>O<sub>3</sub>·5H<sub>2</sub>O (1 mmol), MeOH/H<sub>2</sub>O = 1/1 (2 mL), 80 °C, 2 h, then 1d (0.2 mmol), BF<sub>3</sub>·Et<sub>2</sub>O (0.2 mmol) was added, and stirred at room temperature. <sup>b</sup>Isolated yields. <sup>c</sup>MeOH/H<sub>2</sub>O = 1/2 (2 mL). <sup>d</sup>MeOH/H<sub>2</sub>O = 2/1 (2 mL). <sup>e</sup>TBAB (0.2 mmol) was added.

### III. The Synthetic Procedure for Substrates

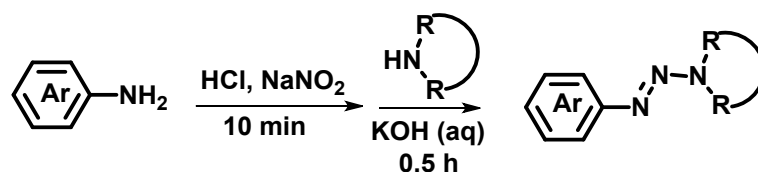

1-Aryltriazenes were prepared by a modification of the literature procedure.<sup>1</sup> A solution of arylamine (10 mmol) in concentrated HCl (2 mL) was cooled in an ice bath while a solution of NaNO<sub>2</sub> (10 mmol) in water (1 mL) was added dropwise. The resulting solution of the diazonium salt was stirred under ice bath for 10 min and then added all at once to a chilled solution of secondary amine (11 mmol) in 1 M KOH (10 mL). The reaction mixture was stirred for 30 min with cooling and the resulting precipitate isolated by filtration. The damp solid was recrystallized from EtOH and dried under reduced pressure or by column chromatography.

1. Margaret, L. G.; David, H. B.; Willard, M. W. *J. Org. Chem.* **1993**, 58, 2104-2109.

#### IV. The Synthetic Procedure and Data for 2a-2y and 3a-3r .

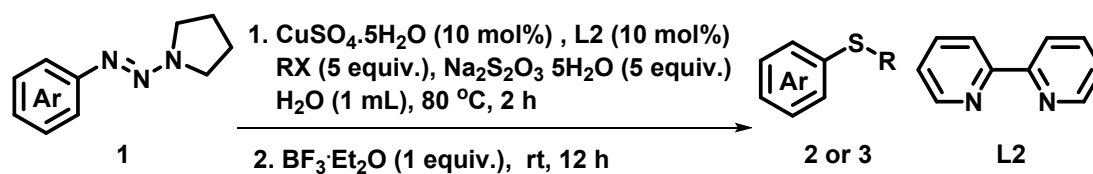

A mixture of  $\text{CuSO}_4 \cdot 5\text{H}_2\text{O}$  (5.0 mg, 10 mol%), **L2** (3.1 mg, 10 mol%), RX (1 mmol, 5 equiv.) and  $\text{Na}_2\text{S}_2\text{O}_3 \cdot 5\text{H}_2\text{O}$  (248 mg, 1 mmol, 5 equiv.) in  $\text{H}_2\text{O}$  (1 mL) in a Schlenk tube was heated at 80 °C for 2 h. After cooled to room temperature, **1** (0.2 mmol, 1 equiv.) was added to the solution, stirred for 15 min at room temperature, and  $\text{BF}_3 \cdot \text{Et}_2\text{O}$  (0.2 mmol, 1 equiv.) was added. The mixture was stirred at room temperature, some substrate need elevate temperature after added  $\text{BF}_3 \cdot \text{Et}_2\text{O}$ . When the reaction was complete, EtOAc (5 mL) was added, the combined mixture was dried over anhydrous  $\text{MgSO}_4$ , then filtrated through celite, washed with EtOAc (5 mL x 3), the mixture was evaporated under vacuum and purified by flash column chromatography (petroleum ether/ethyl acetate 200:1 to ethyl acetate) to afford the desired product **2** or **3**.

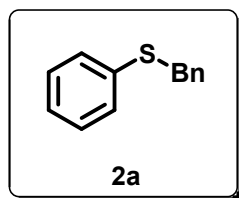

A mixture of  $\text{CuSO}_4 \cdot 5\text{H}_2\text{O}$  (5.0 mg, 10 mol%), **L2** (3.1 mg, 10 mol%), BnCl (126 mg, 1 mmol, 5 equiv.) and  $\text{Na}_2\text{S}_2\text{O}_3 \cdot 5\text{H}_2\text{O}$  (248 mg, 1 mmol, 5 equiv.) in  $\text{H}_2\text{O}$  (1 mL) in a Schlenk tube was heated at 80 °C for 2 h. After cooled to room temperature, **1a** (35 mg, 0.2 mmol, 1 equiv.) was added to the solution, stirred for 15 min at room temperature, then  $\text{BF}_3 \cdot \text{Et}_2\text{O}$  (25  $\mu\text{L}$ , 0.2 mmol, 1 equiv.) was added. The mixture was stirred at room temperature for 12 h. After the reaction was complete, EtOAc (5 mL) was added, the combined mixture was dried over anhydrous  $\text{MgSO}_4$ , then filtrated through celite, washed with EtOAc (5 mL x 3), the mixture was evaporated under vacuum and purified by flash column chromatography (petroleum ether/ethyl acetate 200:1) to afford the desired product benzyl(phenyl)sulfane (**2a**): (38.8 mg, 97%), colorless oil.  $^1\text{H}$  NMR ( $\text{CDCl}_3$ , 400 MHz):  $\delta$  7.13-7.24 (m, 9 H), 7.08-7.11 (m, 1 H), 4.03 (s, 2 H);  $^{13}\text{C}$  NMR ( $\text{CDCl}_3$ , 100 MHz):  $\delta$  137.4, 136.3, 129.8, 128.8, 128.7, 128.4,

127.1, 126.3, 39.0; IR (neat):  $\nu = 1582, 1477, 1230, 1068, 1025, 827, 737, 690$ ; MS: 200.

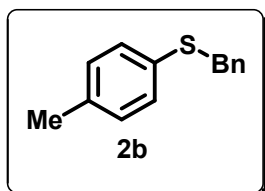

A mixture of  $\text{CuSO}_4 \cdot 5\text{H}_2\text{O}$  (5.0 mg, 10 mol%), **L2** (3.1 mg, 10 mol%),  $\text{BnCl}$  (126 mg, 1 mmol, 5 equiv.) and  $\text{Na}_2\text{S}_2\text{O}_3 \cdot 5\text{H}_2\text{O}$  (248 mg, 1 mmol, 5 equiv.) in  $\text{H}_2\text{O}$  (1 mL) in a Schlenk tube was heated at 80 °C for 2 h. After cooled to room temperature, **1b** (37.8 mg, 0.2 mmol, 1 equiv.) was added to the solution, stirred for 15 min at room temperature, then  $\text{BF}_3 \cdot \text{Et}_2\text{O}$  (25  $\mu\text{L}$ , 0.2 mmol, 1 equiv.) was added. The mixture was stirred at room temperature for 12 h. After the reaction was complete,  $\text{EtOAc}$  (5 mL) was added, the combined mixture was dried over anhydrous  $\text{MgSO}_4$ , then filtrated through celite, washed with  $\text{EtOAc}$  (5 mL x 3), the mixture was evaporated under vacuum and purified by flash column chromatography (petroleum ether/ethyl acetate 200:1) to afford the desired product benzyl(*p*-tolyl)sulfane (**2b**): (35.1 mg, 82%), colorless oil.  $^1\text{H NMR}$  (400 MHz,  $\text{CDCl}_3$ )  $\delta$ : 7.15-7.19 (m, 5 H), 7.14 (d,  $J = 8$  Hz, 2 H), 6.98 (d,  $J = 8$  Hz, 2 H), 3.98 (s, 2 H), 2.22 (s, 3 H);  $^{13}\text{C NMR}$  (100 MHz,  $\text{CDCl}_3$ )  $\delta$ : 137.8, 136.6, 132.5, 130.7, 129.6, 128.9, 128.5, 127.1, 39.8, 21.1; IR (neat):  $\nu = 2970, 2914, 1489, 1451, 1395, 1237, 1066, 800, 711, 694$ ; MS  $m/z$ : 214.

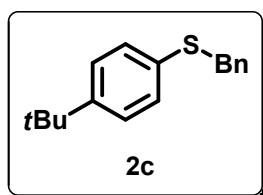

A mixture of  $\text{CuSO}_4 \cdot 5\text{H}_2\text{O}$  (5.0 mg, 10 mol%), **L2** (3.1 mg, 10 mol%),  $\text{BnCl}$  (126 mg, 1 mmol, 5 equiv.) and  $\text{Na}_2\text{S}_2\text{O}_3 \cdot 5\text{H}_2\text{O}$  (248 mg, 1 mmol, 5 equiv.) in  $\text{H}_2\text{O}$  (1 mL) in a Schlenk tube was heated at 80 °C for 2 h. After cooled to room temperature, **1c** (46.2 mg, 0.2 mmol, 1 equiv.) was added to the solution, stirred for 15 min at room temperature, then  $\text{BF}_3 \cdot \text{Et}_2\text{O}$  (25  $\mu\text{L}$ , 0.2 mmol, 1 equiv.) was added. The mixture was stirred at room temperature for 12 h. After the reaction was complete,  $\text{EtOAc}$  (5 mL) was added, the combined mixture was dried over anhydrous  $\text{MgSO}_4$ , then filtrated through celite, washed with  $\text{EtOAc}$  (5 mL x 3), the mixture was evaporated under

vacuum and purified by flash column chromatography (petroleum ether/ethyl acetate 200:1) to afford the desired product benzyl(4-tert-butylphenyl)sulfane (**2c**): (40.4 mg, 79%). colorless oil. <sup>1</sup>H NMR (400 MHz, CDCl<sub>3</sub>) δ: 7.19-7.22 (m, 9 H), 4.03 (s, 2 H), 1.22 (s, 9 H); <sup>13</sup>C NMR (100 MHz, CDCl<sub>3</sub>) δ: 149.7, 137.7, 132.9, 129.9, 128.8, 128.5, 127.1, 39.4, 34.5, 31.3; IR (neat): ν = 2960, 2902, 1600, 1493, 1453, 1396, 1363, 1268, 1119, 1069, 823, 764, 697; MS m/z: 256.

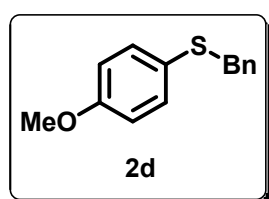

A mixture of CuSO<sub>4</sub>·5H<sub>2</sub>O (5.0 mg, 10 mol%), **L2** (3.1 mg, 10 mol%), BnCl (126 mg, 1 mmol, 5 equiv.) and Na<sub>2</sub>S<sub>2</sub>O<sub>3</sub>·5H<sub>2</sub>O (248 mg, 1 mmol, 5 equiv.) in H<sub>2</sub>O (1 mL) in a Schlenk tube was heated at 80 °C for 2 h. After cooled to room temperature, **1d** (41.0 mg, 0.2 mmol, 1 equiv.) was added to the solution, stirred for 15 min at room temperature, and BF<sub>3</sub>·Et<sub>2</sub>O (25 μL, 0.2 mmol, 1 equiv.) was added. The mixture was stirred at room temperature for 12 h. After the reaction was complete, EtOAc (5 mL) was added, the combined mixture was dried over anhydrous MgSO<sub>4</sub>, then filtrated through celite, washed with EtOAc (5 mL x 3), the mixture was evaporated under vacuum and purified by flash column chromatography (petroleum ether/ethyl acetate 100:1) to afford the desired product benzyl(4-methoxyphenyl)sulfane (**2d**): (40.5 mg, 88%), white solid. <sup>1</sup>H NMR (400 MHz, CDCl<sub>3</sub>) δ: 7.13-7.16 (m, 5 H), 7.08-7.11 (m, 2 H), 6.69 (d, *J* = 8.4 Hz, 2 H), 3.89 (s, 2 H), 3.66 (s, 3 H); <sup>13</sup>C NMR (100 MHz, CDCl<sub>3</sub>) δ: 159.2, 138.2, 134.1, 128.9, 128.6, 128.4, 127.0, 126.1, 114.5, 55.3, 41.3; IR (neat): ν = 2960, 2917, 2835, 1593, 1491, 1453, 1285, 1241, 1176, 1026, 811, 696; MS m/z: 230.

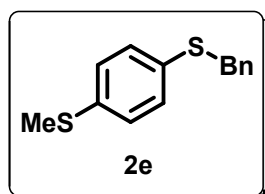

A mixture of CuSO<sub>4</sub>·5H<sub>2</sub>O (5.0 mg, 10 mol%), **L2** (3.1 mg, 10 mol%), BnCl (126 mg, 1 mmol, 5 equiv.) and Na<sub>2</sub>S<sub>2</sub>O<sub>3</sub>·5H<sub>2</sub>O (248 mg, 1 mmol, 5 equiv.) in H<sub>2</sub>O (1 mL) in a Schlenk tube was heated at 80 °C for 2 h. After cooled to

room temperature, **1e** (44.2 mg, 0.2 mmol, 1 equiv.) was added to the solution, stirred for 15 min at room temperature, then  $\text{BF}_3 \cdot \text{Et}_2\text{O}$  (25  $\mu\text{L}$ , 0.2 mmol, 1 equiv.) was added. The mixture was stirred at room temperature for 12 h. After the reaction was complete, EtOAc (5 mL) was added, the combined mixture was dried over anhydrous  $\text{MgSO}_4$ , then filtrated through celite, washed with EtOAc (5 mL x 3), the mixture was evaporated under vacuum and purified by flash column chromatography (petroleum ether/ethyl acetate 100:1) to afford the desired product benzyl(4-(methylthio)phenyl)sulfane (**2e**): (29.0 mg, 59%), white solid.  $^1\text{H}$  NMR (400 MHz,  $\text{CDCl}_3$ )  $\delta$ : 7.15-7.18 (m, 7 H), 7.04-7.13 (m, 2 H), 3.98 (s, 2 H), 2.37 (s, 3 H);  $^{13}\text{C}$  NMR (100 MHz,  $\text{CDCl}_3$ )  $\delta$ : 137.6, 137.1, 132.5, 131.2, 128.8, 128.5, 127.2, 127.0, 39.7, 15.9; IR (neat):  $\nu$  = 2918, 2851, 1493, 1474, 1390, 1260, 1238, 1102, 1005, 804, 695; HRMS (FAB): Calcd for  $\text{C}_{14}\text{H}_{15}\text{S}_2$ : 246.0537, Found 246.0539.

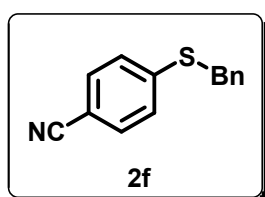

A mixture of  $\text{CuSO}_4 \cdot 5\text{H}_2\text{O}$  (5.0 mg, 10 mol%), **L2** (3.1 mg, 10 mol%),  $\text{BnCl}$  (126 mg, 1 mmol, 5 equiv.) and  $\text{Na}_2\text{S}_2\text{O}_3 \cdot 5\text{H}_2\text{O}$  (248 mg, 1 mmol, 5 equiv.) in  $\text{H}_2\text{O}$  (1 mL) in a Schlenk tube was heated at 80  $^\circ\text{C}$  for 2 h. After cooled to room temperature, **1f** (40.0 mg, 0.2 mmol, 1 equiv.) was added to the solution, stirred for 15 min at room temperature, then  $\text{BF}_3 \cdot \text{Et}_2\text{O}$  (25  $\mu\text{L}$ , 0.2 mmol, 1 equiv.) was added. The mixture was allowed to 50  $^\circ\text{C}$  for 12 h. After the reaction was complete, EtOAc (5 mL) was added at room temperature, the combined mixture was dried over anhydrous  $\text{MgSO}_4$ , then filtrated through celite, washed with EtOAc (5 mL x 3), the mixture was evaporated under vacuum and purified by flash column chromatography (petroleum ether/ethyl acetate 50:1) to afford the desired product 4-(benzylthio)benzonitrile (**2f**): (25.2 mg, 56%), white solid.  $^1\text{H}$  NMR (400 MHz,  $\text{CDCl}_3$ )  $\delta$ : 7.43 (d,  $J$  = 8.8 Hz, 2 H), 7.19-7.42 (m, 7 H), 4.13 (s, 2 H);  $^{13}\text{C}$  NMR (100 MHz,  $\text{CDCl}_3$ )  $\delta$ : 144.5, 135.7, 132.2, 128.8, 128.7, 127.7, 127.3, 118.8, 108.6, 37.1; IR (neat):  $\nu$  = 2923, 2853, 2222, 1903, 1739, 1590, 1483, 1453, 1398, 1086, 818, 780, 718, 698; MS  $m/z$ : 225.



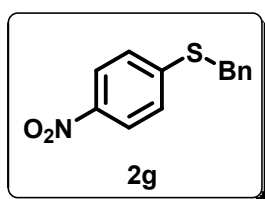

A mixture of  $\text{CuSO}_4 \cdot 5\text{H}_2\text{O}$  (5.0 mg, 10 mol%), **L2** (3.1 mg, 10 mol%),  $\text{BnCl}$  (126 mg, 1 mmol, 5 equiv.) and  $\text{Na}_2\text{S}_2\text{O}_3 \cdot 5\text{H}_2\text{O}$  (248 mg, 1 mmol, 5 equiv.) in  $\text{H}_2\text{O}$  (1 mL) in a Schlenk tube was heated at 80 °C for 2 h. After cooled to room temperature, **1g** (44.0 mg, 0.2 mmol, 1 equiv.) was added to the solution, stirred for 15 min at room temperature, then  $\text{BF}_3 \cdot \text{Et}_2\text{O}$  (25  $\mu\text{L}$ , 0.2 mmol, 1 equiv.) was added. The mixture was allowed to 80 °C for 6 h. After the reaction was complete,  $\text{EtOAc}$  (5 mL) was added at room temperature, the combined mixture was dried over anhydrous  $\text{MgSO}_4$ , then filtrated through celite, washed with  $\text{EtOAc}$  (5 mL x 3), the mixture was evaporated under vacuum and purified by flash column chromatography (petroleum ether/ethyl acetate 20:1) to afford the desired product benzyl(4-nitrophenyl)sulfane (**2g**): (33.8 mg, 69%), white solid.  $^1\text{H NMR}$  (400 MHz,  $\text{CDCl}_3$ )  $\delta$ : 8.01-8.03 (m, 2 H), 7.18-7.32 (m, 7 H), 4.17 (s, 2 H);  $^{13}\text{C NMR}$  (100 MHz,  $\text{CDCl}_3$ )  $\delta$ : 147.2, 145.5, 135.5, 128.9, 128.7, 127.8, 1265.7, 123.9, 37.1; IR (neat):  $\nu = 2962, 1572, 1507, 1451, 1334, 1179, 837, 739, 717, 697$ ; MS  $m/z$ : 245.

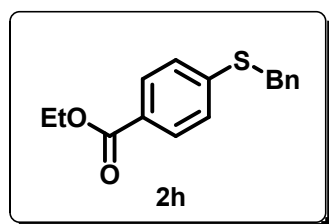

A mixture of  $\text{CuSO}_4 \cdot 5\text{H}_2\text{O}$  (5.0 mg, 10 mol%), **L2** (3.1 mg, 10 mol%),  $\text{BnCl}$  (126 mg, 1 mmol, 5 equiv.) and  $\text{Na}_2\text{S}_2\text{O}_3 \cdot 5\text{H}_2\text{O}$  (248 mg, 1 mmol, 5 equiv.) in  $\text{H}_2\text{O}$  (1 mL) in a Schlenk tube was heated at 80 °C for 2 h. After cooled to room temperature, **1h** (49.4 mg, 0.2 mmol, 1 equiv.) was added to the solution, stirred for 15 min at room temperature, then  $\text{BF}_3 \cdot \text{Et}_2\text{O}$  (25  $\mu\text{L}$ , 0.2 mmol, 1 equiv.) was added. The mixture was stirred at room temperature for 12 h. After the reaction was complete,  $\text{EtOAc}$  (5 mL) was added at room temperature, the combined mixture was dried over anhydrous  $\text{MgSO}_4$ , then filtrated through celite, washed with  $\text{EtOAc}$  (5 mL x 3), the mixture was evaporated under vacuum and purified by flash column chromatography (petroleum ether/ethyl acetate 10:1) to afford the desired product ethyl 4-(benzylthio)benzoate (**2h**): (39.2 mg, 72%), yellow solid.  $^1\text{H NMR}$

(400 MHz, CDCl<sub>3</sub>)  $\delta$ : 7.84 (d,  $J$  = 8.0 Hz, 2 H), 7.18-7.29 (m, 7 H), 4.27 (q,  $J$  = 7.2 Hz, 2 H), 4.12 (s, 2 H), 1.30 (t,  $J$  = 7.2 Hz, 3 H); <sup>13</sup>C NMR (100 MHz, CDCl<sub>3</sub>)  $\delta$ : 166.3, 143.5, 136.4, 129.9, 128.8, 128.7, 127.5, 127.1, 66.9, 37.4, 14.3; IR (neat):  $\nu$  = 2098, 1711, 1593, 1271, 1179, 1107, 1017, 758, 693; MS  $m/z$ : 272.

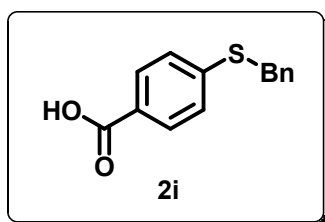

A mixture of CuSO<sub>4</sub>·5H<sub>2</sub>O (5.0 mg, 10 mol%), **L2** (3.1 mg, 10 mol%), BnCl (126 mg, 1 mmol, 5 equiv.) and Na<sub>2</sub>S<sub>2</sub>O<sub>3</sub>·5H<sub>2</sub>O (248 mg, 1 mmol, 5 equiv.) in H<sub>2</sub>O (1 mL) in a Schlenk tube was heated at 80 °C for 2 h. After cooled to room temperature, **1i** (43.8 mg, 0.2 mmol, 1 equiv.) was added to the solution, stirred for 15 min at room temperature, then BF<sub>3</sub>·Et<sub>2</sub>O (25  $\mu$ L, 0.2 mmol, 1 equiv.) was added. The mixture was allowed to 80 °C for 6 h. After the reaction was complete, EtOAc (5 mL) was added at room temperature, the combined mixture was dried over anhydrous MgSO<sub>4</sub>, then filtrated through celite, washed with EtOAc (5 mL x 3), the mixture was evaporated under vacuum and purified by flash column chromatography (petroleum ether/ethyl acetate 1:1 to ethyl acetate) to afford the desired product 4-(benzylthio)benzoic acid (**2i**): (34.6 mg, 71%), white solid. <sup>1</sup>H NMR (400 MHz, CDCl<sub>3</sub>)  $\delta$ : 12.87 (br, 1 H), 7.83 (d,  $J$  = 8.4 Hz, 2 H), 7.41-7.43 (m, 4 H), 7.30-7.34 (m, 2 H), 7.26 (t,  $J$  = 7.2 Hz, 1 H), 4.35 (s, 2 H); <sup>13</sup>C NMR (100 MHz, CDCl<sub>3</sub>)  $\delta$ : 167.4, 143.5, 137.0, 130.2, 129.3, 128.9, 127.9, 127.7, 126.9, 35.8; IR (neat):  $\nu$  = 3060, 3027, 2972, 2911, 1677, 1591, 1493, 1452, 1321, 1293, 1118, 919, 759, 694; MS  $m/z$ : 244.

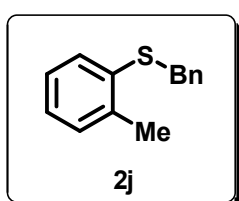

A mixture of CuSO<sub>4</sub>·5H<sub>2</sub>O (5.0 mg, 10 mol%), **L2** (3.1 mg, 10 mol%), BnCl (126 mg, 1 mmol, 5 equiv.) and Na<sub>2</sub>S<sub>2</sub>O<sub>3</sub>·5H<sub>2</sub>O (248 mg, 1 mmol, 5 equiv.) in H<sub>2</sub>O (1 mL) in a Schlenk tube was heated at 80 °C for 2 h. After cooled to room temperature,

**1j** (37.8 mg, 0.2 mmol, 1 equiv.) was added to the solution, stirred for 15 min at room temperature, then  $\text{BF}_3 \cdot \text{Et}_2\text{O}$  (25  $\mu\text{L}$ , 0.2 mmol, 1 equiv.) was added. The mixture was stirred at room temperature for 12 h. After the reaction was complete, EtOAc (5 mL) was added at room temperature, the combined mixture was dried over anhydrous  $\text{MgSO}_4$ , then filtrated through celite, washed with EtOAc (5 mL x 3), the mixture was evaporated under vacuum and purified by flash column chromatography (petroleum ether/ethyl acetate 200:1) to afford the desired product benzyl(o-tolyl)sulfane (**2j**): (30.0 mg, 70%), colorless oil.  $^1\text{H}$  NMR (400 MHz,  $\text{CDCl}_3$ )  $\delta$ : 7.14-7.21 (m, 6 H), 7.01-7.06 (m, 3 H), 3.99 (s, 2 H), 2.24 (s, 3 H);  $^{13}\text{C}$  NMR (100 MHz,  $\text{CDCl}_3$ )  $\delta$ : 137.9, 137.3, 135.8, 130.1, 129.0, 128.9, 128.5, 127.2, 126.4, 126.1, 38.3, 20.3; IR (neat):  $\nu$  = 2920, 1587, 1493, 1452, 1238, 743, 696; MS m/z: 214.

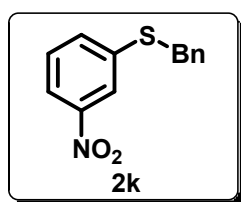

A mixture of  $\text{CuSO}_4 \cdot 5\text{H}_2\text{O}$  (5.0 mg, 10 mol%), **L2** (3.1 mg, 10 mol%),  $\text{BnCl}$  (126 mg, 1 mmol, 5 equiv.) and  $\text{Na}_2\text{S}_2\text{O}_3 \cdot 5\text{H}_2\text{O}$  (248 mg, 1 mmol, 5 equiv.) in  $\text{H}_2\text{O}$  (1 mL) in a Schlenk tube was heated at 80  $^\circ\text{C}$  for 2 h. After cooled to room temperature, **1k** (44.0 mg, 0.2 mmol, 1 equiv.) was added to the solution, stirred for 15 min at room temperature, then  $\text{BF}_3 \cdot \text{Et}_2\text{O}$  (25  $\mu\text{L}$ , 0.2 mmol, 1 equiv.) was added. The mixture was stirred at room temperature for 12 h. After the reaction was complete, EtOAc (5 mL) was added at room temperature, the combined mixture was dried over anhydrous  $\text{MgSO}_4$ , then filtrated through celite, washed with EtOAc (5 mL x 3), the mixture was evaporated under vacuum and purified by flash column chromatography (petroleum ether/ethyl acetate 20:1) to afford the desired product benzyl(3-nitrophenyl)sulfane (**2k**): (33.3 mg, 68%), white solid.  $^1\text{H}$  NMR (400 MHz,  $\text{CDCl}_3$ )  $\delta$ : 8.05 (t,  $J = 1.6$  Hz, 1 H), 7.91 (dd,  $J_1 = 1.6$  Hz,  $J_2 = 8$  Hz, 1 H), 7.47 (d,  $J = 7.6$  Hz, 1 H), 7.32 (t,  $J = 8$  Hz, 1 H), 7.18-7.27 (m, 5 H), 4.13 (s, 2 H);  $^{13}\text{C}$  NMR (100 MHz,  $\text{CDCl}_3$ )  $\delta$ : 148.4, 139.4, 136.0, 134.6, 129.5, 128.9, 128.8, 128.6, 127.7, 123.1, 120.8, 38.2; IR (neat):  $\nu$  = 1593, 1574, 1516, 1344, 724; HRMS (FAB): Calcd for  $\text{C}_{13}\text{H}_{11}\text{NO}_2\text{S}$ : 245.0511, Found : 245.0509.

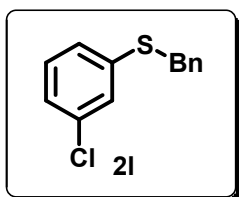

A mixture of  $\text{CuSO}_4 \cdot 5\text{H}_2\text{O}$  (5.0 mg, 10 mol%), **L2** (3.1 mg, 10 mol%),  $\text{BnCl}$  (126 mg, 1 mmol, 5 equiv.) and  $\text{Na}_2\text{S}_2\text{O}_3 \cdot 5\text{H}_2\text{O}$  (248 mg, 1 mmol, 5 equiv.) in  $\text{H}_2\text{O}$  (1 mL) in a Schlenk tube was heated at 80 °C for 2 h. After cooled to room temperature, **1l** (41.8 mg, 0.2 mmol, 1 equiv.) was added to the solution, stirred for 15 min at room temperature, then  $\text{BF}_3 \cdot \text{Et}_2\text{O}$  (25  $\mu\text{L}$ , 0.2 mmol, 1 equiv.) was added. The mixture was stirred at room temperature for 12 h. After the reaction was complete,  $\text{EtOAc}$  (5 mL) was added at room temperature, the combined mixture was dried over anhydrous  $\text{MgSO}_4$ , then filtrated through celite, washed with  $\text{EtOAc}$  (5 mL x 3), the mixture was evaporated under vacuum and purified by flash column chromatography (petroleum ether/ethyl acetate 200:1) to afford the desired product benzyl(3-chlorophenyl)sulfane (**2l**): (40.7 mg, 87%), white solid.  $^1\text{H NMR}$  (400 MHz,  $\text{CDCl}_3$ )  $\delta$ : 7.17-7.23 (m, 6 H), 7.07-7.08 (m, 3 H), 4.04 (s, 2 H);  $^{13}\text{C NMR}$  (100 MHz,  $\text{CDCl}_3$ )  $\delta$ : 138.6, 136.8, 134.6, 129.8, 129.0, 128.8, 128.6, 127.4, 127.3, 126.3, 38.7; IR (neat):  $\nu$  = 1588, 1488, 1445, 1255, 943, 880, 784, 743; HRMS (FAB): Calcd for  $\text{C}_{13}\text{H}_{11}\text{ClS}$ : 234.0270, Found 234.0271.

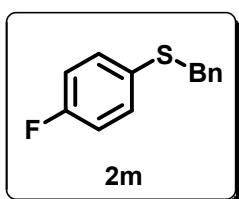

A mixture of  $\text{CuSO}_4 \cdot 5\text{H}_2\text{O}$  (5.0 mg, 10 mol%), **L2** (3.1 mg, 10 mol%),  $\text{BnCl}$  (126 mg, 1 mmol, 5 equiv.) and  $\text{Na}_2\text{S}_2\text{O}_3 \cdot 5\text{H}_2\text{O}$  (248 mg, 1 mmol, 5 equiv.) in  $\text{H}_2\text{O}$  (1 mL) in a Schlenk tube was heated at 80 °C for 2 h. After cooled to room temperature, **1m** (38.6 mg, 0.2 mmol, 1 equiv.) was added to the solution, stirred for 15 min at room temperature, then  $\text{BF}_3 \cdot \text{Et}_2\text{O}$  (25  $\mu\text{L}$ , 0.2 mmol, 1 equiv.) was added. The mixture was stirred at room temperature for 12 h. After the reaction was complete,  $\text{EtOAc}$  (5 mL) was added, the combined mixture was dried over anhydrous  $\text{MgSO}_4$ , then filtrated through celite, washed with  $\text{EtOAc}$  (5 mL x 3), the mixture was evaporated under vacuum and purified by flash column chromatography (petroleum

ether/ethyl acetate 200:1) to afford the desired product benzyl(4-fluorophenyl)sulfane (**2m**): (35.3 mg, 81%), colorless oil.  $^1\text{H}$  NMR ( $\text{CDCl}_3$ , 400 MHz):  $\delta$  7.11-7.19 (m, 7 H), 6.82-6.87 (m, 2 H), 3.94 (s, 2 H);  $^{19}\text{F}$  NMR ( $\text{CDCl}_3$ , 376 MHz):  $\delta$  -114.7 (s, 1 F);  $^{13}\text{C}$  NMR ( $\text{CDCl}_3$ , 100 MHz):  $\delta$  162.1 (d,  $J_{\text{C-F}} = 245$  Hz), 137.5, 133.4 (d,  $J_{\text{C-F}} = 8$  Hz), 130.8 (d,  $J_{\text{C-F}} = 3.3$  Hz), 128.9, 128.5, 127.2, 115.9 (d,  $J_{\text{C-F}} = 21$  Hz), 40.5; IR (neat):  $\nu = 1592, 1487, 1397, 1227, 1158, 1091, 820, 694$ ; MS: 218.

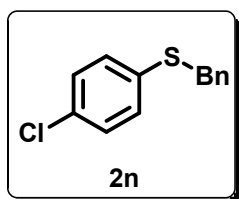

A mixture of  $\text{CuSO}_4 \cdot 5\text{H}_2\text{O}$  (5.0 mg, 10 mol%), **L2** (3.1 mg, 10 mol%),  $\text{BnCl}$  (126 mg, 1 mmol, 5 equiv.) and  $\text{Na}_2\text{S}_2\text{O}_3 \cdot 5\text{H}_2\text{O}$  (248 mg, 1 mmol, 5 equiv.) in  $\text{H}_2\text{O}$  (1 mL) in a Schlenk tube was heated at 80 °C for 2 h. After cooled to room temperature, **1n** (41.8 mg, 0.2 mmol, 1 equiv.) was added to the solution, stirred for 15 min at room temperature, then  $\text{BF}_3 \cdot \text{Et}_2\text{O}$  (25  $\mu\text{L}$ , 0.2 mmol, 1 equiv.) was added. The mixture was stirred at room temperature for 12 h. After the reaction was complete,  $\text{EtOAc}$  (5 mL) was added, the combined mixture was dried over anhydrous  $\text{MgSO}_4$ , then filtrated through celite, washed with  $\text{EtOAc}$  (5 mL x 3), the mixture was evaporated under vacuum and purified by flash column chromatography (petroleum ether/ethyl acetate 200:1) to afford the desired product benzyl(4-chlorophenyl)sulfane (**2n**): (34.2 mg, 73%), white solid.  $^1\text{H}$  NMR (400 MHz,  $\text{CDCl}_3$ )  $\delta$ : 7.14-7.22 (m, 5 H), 7.12 (s, 4H), 3.99 (s, 2 H);  $^{13}\text{C}$  NMR (100 MHz,  $\text{CDCl}_3$ )  $\delta$ : 137.1, 134.7, 132.5, 131.4, 129.4, 129.1, 129.0, 128.8, 127.3, 39.3; IR (neat):  $\nu = 2902, 1452, 1393, 1229, 1068, 893, 810$ ; MS  $m/z$ : 234.

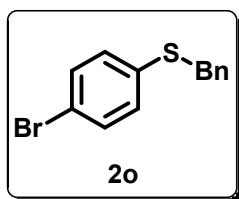

A mixture of  $\text{CuSO}_4 \cdot 5\text{H}_2\text{O}$  (5.0 mg, 10 mol%), **L2** (3.1 mg, 10 mol%),  $\text{BnCl}$  (126 mg, 1 mmol, 5 equiv.) and  $\text{Na}_2\text{S}_2\text{O}_3 \cdot 5\text{H}_2\text{O}$  (248 mg, 1 mmol, 5 equiv.) in  $\text{H}_2\text{O}$  (1 mL) in a Schlenk tube was heated at 80 °C for 2 h. After cooled to room temperature, **1o** (50.8 mg, 0.2 mmol, 1 equiv.) was added to the solution, stirred for 15 min at room temperature, then  $\text{BF}_3 \cdot \text{Et}_2\text{O}$  (25  $\mu\text{L}$ , 0.2 mmol, 1 equiv.) was added. The mixture was

stirred at room temperature for 12 h. After the reaction was complete, EtOAc (5 mL) was added, the combined mixture was dried over anhydrous MgSO<sub>4</sub>, then filtrated through celite, washed with EtOAc (5 mL x 3), the mixture was evaporated under vacuum and purified by flash column chromatography (petroleum ether/ethyl acetate 200:1) to afford the desired product benzyl(4-bromophenyl)sulfane: (**2o**) (42.4 mg, 76%), white solid. <sup>1</sup>H NMR (400 MHz, CDCl<sub>3</sub>) δ: 7.27 (d, *J* = 8.4 Hz, 2 H), 7.12-7.21 (m, 5 H), 7.06 (d, *J* = 8.4 Hz, 2 H), 4.00 (s, 2 H); <sup>13</sup>C NMR (100 MHz, CDCl<sub>3</sub>) δ: 137.1, 135.5, 131.9, 131.5, 128.8, 128.6, 127.4, 120.3, 39.1; IR (neat): ν = 2970, 1492, 1384, 1230, 1069, 1004, 807, 763, 695; MS *m/z*: 279.

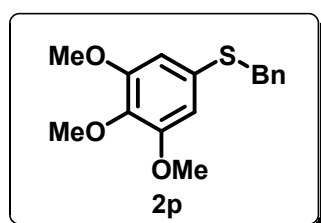

A mixture of CuSO<sub>4</sub>·5H<sub>2</sub>O (5.0 mg, 10 mol%), **L2** (3.1 mg, 10 mol%), BnCl (126 mg, 1 mmol, 5 equiv.) and Na<sub>2</sub>S<sub>2</sub>O<sub>3</sub>·5H<sub>2</sub>O (248 mg, 1 mmol, 5 equiv.) in H<sub>2</sub>O (1 mL) in a Schlenk tube was heated at 80 °C for 2 h. After cooled to room temperature, **1p** (53.0 mg, 0.2 mmol, 1 equiv.) was added to the solution, stirred for 15 min at room temperature, then BF<sub>3</sub>·Et<sub>2</sub>O (25 μL, 0.2 mmol, 1 equiv.) was added. The mixture was stirred at room temperature for 12 h. After the reaction was complete, EtOAc (5 mL) was added at room temperature, the combined mixture was dried over anhydrous MgSO<sub>4</sub>, then filtrated through celite, washed with EtOAc (5 mL x 3), the mixture was evaporated under vacuum and purified by flash column chromatography (petroleum ether/ethyl acetate 50:1) to afford the desired product benzyl(3,4,5-trimethoxyphenyl)sulfane (**2p**): (56.8 mg, 98%), colorless oil. <sup>1</sup>H NMR (400 MHz, CDCl<sub>3</sub>) δ: 7.18-7.22 (m, 5 H), 6.43 (s, 2 H), 3.98 (s, 2 H), 3.74 (s, 3 H), 3.68(s, 6 H); <sup>13</sup>C NMR (100 MHz, CDCl<sub>3</sub>) δ: 153.1, 137.9, 137.4, 130.4, 130.0, 128.5, 127.2, 108.6, 60.9, 56.1, 40.4; IR (neat): ν = 2935, 2831, 1577, 1496, 1451, 1306, 1330, 1123, 1004, 879, 796 698; HRMS (FAB): Calcd for C<sub>16</sub>H<sub>18</sub>O<sub>3</sub>S: 290.0977, Found 290.0979.

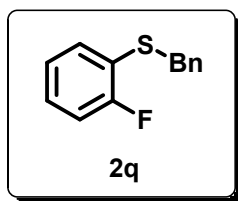

A mixture of  $\text{CuSO}_4 \cdot 5\text{H}_2\text{O}$  (5.0 mg, 10 mol%), **L2** (3.1 mg, 10 mol%),  $\text{BnCl}$  (126 mg, 1 mmol, 5 equiv.) and  $\text{Na}_2\text{S}_2\text{O}_3 \cdot 5\text{H}_2\text{O}$  (248 mg, 1 mmol, 5 equiv.) in  $\text{H}_2\text{O}$  (1 mL) in a Schlenk tube was heated at 80 °C for 2 h. After cooled to room temperature, **1q** (38.6 mg, 0.2 mmol, 1 equiv.) was added to the solution, stirred for 15 min at room temperature, then  $\text{BF}_3 \cdot \text{Et}_2\text{O}$  (25  $\mu\text{L}$ , 0.2 mmol, 1 equiv.) was added. The mixture was stirred at room temperature for 12 h. After the reaction was complete,  $\text{EtOAc}$  (5 mL) was added at room temperature, the combined mixture was dried over anhydrous  $\text{MgSO}_4$ , then filtrated through celite, washed with  $\text{EtOAc}$  (5 mL x 3), the mixture was evaporated under vacuum and purified by flash column chromatography (petroleum ether/ethyl acetate 200:1) to afford the desired product benzyl(2-fluorophenyl)sulfane (**2q**): (28.3 mg, 65%) colorless oil.  $^1\text{H NMR}$  (400 MHz,  $\text{CDCl}_3$ )  $\delta$ : 7.26-7.30 (m, 3 H), 7.22-7.24 (m, 2 H), 7.15-7.19 (m, 2 H), 7.02-7.09 (m, 2 H), 4.07 (s, 2 H);  $^{19}\text{F NMR}$  ( $\text{CDCl}_3$ , 376 MHz):  $\delta$  -109.1 (s, 1 F);  $^{13}\text{C NMR}$  (100 MHz,  $\text{CDCl}_3$ )  $\delta$ : 161.6 (d,  $J_{\text{C-F}} = 244$  Hz), 137.1, 132.9 (d,  $J_{\text{C-F}} = 1.8$  Hz), 128.7, 128.6 (d,  $J_{\text{C-F}} = 38$  Hz), 127.2, 124.6 (d,  $J_{\text{C-F}} = 4$  Hz), 122.7 (d,  $J_{\text{C-F}} = 17$  Hz), 115.6 (d,  $J_{\text{C-F}} = 22$  Hz), 38.3 (d,  $J_{\text{C-F}} = 3$  Hz); IR (neat):  $\nu = 2922, 1523, 1493, 1471, 745$ ; MS  $m/z$ : 218.

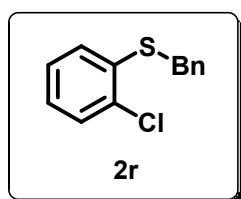

A mixture of  $\text{CuSO}_4 \cdot 5\text{H}_2\text{O}$  (5.0 mg, 10 mol%), **L2** (3.1 mg, 10 mol%),  $\text{BnCl}$  (126 mg, 1 mmol, 5 equiv.) and  $\text{Na}_2\text{S}_2\text{O}_3 \cdot 5\text{H}_2\text{O}$  (248 mg, 1 mmol, 5 equiv.) in  $\text{H}_2\text{O}$  (1 mL) in a Schlenk tube was heated at 80 °C for 2 h. After cooled to room temperature, **1r** (41.8 mg, 0.2 mmol, 1 equiv.) was added to the solution, stirred for 15 min at room temperature, then  $\text{BF}_3 \cdot \text{Et}_2\text{O}$  (25  $\mu\text{L}$ , 0.2 mmol, 1 equiv.) was added. The mixture was stirred at room temperature for 12 h. After the reaction was complete,  $\text{EtOAc}$  (5 mL) was added at room temperature, the combined mixture was dried over anhydrous  $\text{MgSO}_4$ , then filtrated through celite, washed with  $\text{EtOAc}$  (5 mL x 3), the mixture was evaporated under vacuum and purified by flash column chromatography (petroleum ether/ethyl acetate 200:1) to afford the desired product benzyl(2-chlorophenyl)sulfane

(**2r**): (30.0 mg, 64%), white solid.  $^1\text{H}$  NMR (400 MHz,  $\text{CDCl}_3$ )  $\delta$ : 7.18-7.30 (m, 7 H), 7.02-7.17 (m, 2 H), 4.07 (s, 2 H);  $^{13}\text{C}$  NMR (100 MHz,  $\text{CDCl}_3$ )  $\delta$ : 136.3, 135.8, 133.7, 129.7, 129.3, 128.9, 128.6, 127.4, 127.1, 126.9, 37.5; IR (neat):  $\nu$  = 2924, 1523, 1493, 743; MS  $m/z$ : 234.

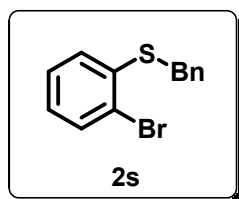

A mixture of  $\text{CuSO}_4 \cdot 5\text{H}_2\text{O}$  (5.0 mg, 10 mol%), **L2** (3.1 mg, 10 mol%),  $\text{BnCl}$  (126 mg, 1 mmol, 5 equiv.) and  $\text{Na}_2\text{S}_2\text{O}_3 \cdot 5\text{H}_2\text{O}$  (248 mg, 1 mmol, 5 equiv.) in  $\text{H}_2\text{O}$  (1 mL) in a Schlenk tube was heated at 80 °C for 2 h. After cooled to room temperature, **1s** (50.6 mg, 0.2 mmol, 1 equiv.) was added to the solution, stirred for 15 min at room temperature, then  $\text{BF}_3 \cdot \text{Et}_2\text{O}$  (25  $\mu\text{L}$ , 0.2 mmol, 1 equiv.) was added. The mixture was stirred at room temperature for 12 h. After the reaction was complete,  $\text{EtOAc}$  (5 mL) was added at room temperature, the combined mixture was dried over anhydrous  $\text{MgSO}_4$ , then filtrated through celite, washed with  $\text{EtOAc}$  (5 mL x 3), the mixture was evaporated under vacuum and purified by flash column chromatography (petroleum ether/ethyl acetate 200:1) to afford the desired product benzyl(2-bromophenyl)sulfane (**2s**): (40.7 mg, 73%) white solid.  $^1\text{H}$  NMR (400 MHz,  $\text{CDCl}_3$ )  $\delta$ : 7.56-7.58 (m, 1 H), 7.38-7.40 (m, 2 H), 7.31-7.35 (m, 2 H), 7.27-7.30 (m, 1 H), 7.23-7.26 (m, 2 H), 7.02-7.07 (m, 1 H), 4.18 (s, 2 H);  $^{13}\text{C}$  NMR (100 MHz,  $\text{CDCl}_3$ )  $\delta$ : 137.9, 136.1, 132.9, 129.0, 128.8, 127.7, 127.5, 126.9, 123.6, 37.9; IR (neat):  $\nu$  = 2923, 1575, 1493, 743; MS  $m/z$ : 279.

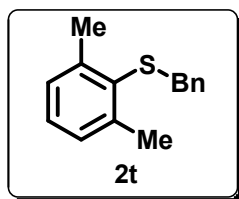

A mixture of  $\text{CuSO}_4 \cdot 5\text{H}_2\text{O}$  (5.0 mg, 10 mol%), **L2** (3.1 mg, 10 mol%),  $\text{BnCl}$  (126 mg, 1 mmol, 5 equiv.) and  $\text{Na}_2\text{S}_2\text{O}_3 \cdot 5\text{H}_2\text{O}$  (248 mg, 1 mmol, 5 equiv.) in  $\text{H}_2\text{O}$  (1 mL) in a Schlenk tube was heated at 80 °C for 2 h. After cooled to room temperature, **1t** (40.6 mg, 0.2 mmol, 1 equiv.) was added to the solution, stirred for 15 min at room temperature, then  $\text{BF}_3 \cdot \text{Et}_2\text{O}$  (25  $\mu\text{L}$ , 0.2 mmol, 1 equiv.) was added. The mixture was



allowed to 50 °C for 12 h. After the reaction was complete, EtOAc (5 mL) was added at room temperature, the combined mixture was dried over anhydrous MgSO<sub>4</sub>, then filtrated through celite, washed with EtOAc (5 mL x 3), the mixture was evaporated under vacuum and purified by flash column chromatography (petroleum ether/ethyl acetate 200:1) to afford the desired product benzyl(2,6-dimethylphenyl)sulfane (**2t**): (22.3 mg, 49%), colorless oil. <sup>1</sup>H NMR (400 MHz, CDCl<sub>3</sub>) δ: 7.14-7.19 (m, 3 H), 7.03-7.05 (m, 1 H), 6.99-7.01 (m, 4 H), 3.72 (s, 2 H), 2.32 (s, 6 H); <sup>13</sup>C NMR (100 MHz, CDCl<sub>3</sub>) δ: 143.6, 138.4, 132.8, 128.6, 128.5, 128.3, 128.0, 126.9, 39.8, 21.8; IR (neat): ν = 3058, 3027, 2921, 1600, 1493, 1455, 1375, 1232, 767, 696; MS m/z: 228.

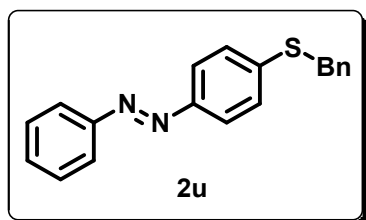

A mixture of CuSO<sub>4</sub>·5H<sub>2</sub>O (5.0 mg, 10 mol%), **L2** (3.1 mg, 10 mol%), BnCl (126 mg, 1 mmol, 5 equiv.) and Na<sub>2</sub>S<sub>2</sub>O<sub>3</sub>·5H<sub>2</sub>O (248 mg, 1 mmol, 5 equiv.) in H<sub>2</sub>O (1 mL) in a Schlenk tube was heated at 80 °C for 2 h. After cooled to room temperature, **1u** (55.8 mg, 0.2 mmol, 1 equiv.) was added to the solution, stirred for 15 min at room temperature, then BF<sub>3</sub>·Et<sub>2</sub>O (25 μL, 0.2 mmol, 1 equiv.) was added. The mixture was stirred at room temperature for 12 h. After the reaction was complete, EtOAc (5 mL) was added at room temperature, the combined mixture was dried over anhydrous MgSO<sub>4</sub>, then filtrated through celite, washed with EtOAc (5 mL x 3), the mixture was evaporated under vacuum and purified by flash column chromatography (petroleum ether/ethyl acetate 200:1) to afford the desired product (*E*)-1-(4-(benzylthio)phenyl)-2-phenyldiazene (**2u**): (45.0 mg, 74%), red solid. <sup>1</sup>H NMR (400 MHz, CDCl<sub>3</sub>) δ: 7.80 (d, *J* = 7.2 Hz, 2 H), 7.73 (d, *J* = 8.4 Hz, 2 H), 7.35-7.42 (m, 3 H), 7.21-7.30 (m, 4 H), 7.12-7.19 (m, 3 H), 4.10 (s, 2 H); <sup>13</sup>C NMR (100 MHz, CDCl<sub>3</sub>) δ: 152.7, 150.6, 141.1, 136.7, 131.0, 129.2, 128.9, 128.7, 128.6, 128.5, 127.5, 123.4, 122.9, 38.0; IR (neat): ν = 2970, 2904, 1582, 1496, 1400, 828, 766, 715, 685; HRMS (FAB): Calcd for C<sub>19</sub>H<sub>16</sub>N<sub>2</sub>S: 304.1034, Found 304.1036.

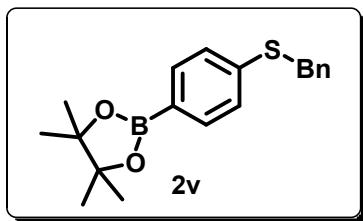

A mixture of  $\text{CuSO}_4 \cdot 5\text{H}_2\text{O}$  (5.0 mg, 10 mol%), **L2** (3.1 mg, 10 mol%),  $\text{BnCl}$  (126 mg, 1 mmol, 5 equiv.) and  $\text{Na}_2\text{S}_2\text{O}_3 \cdot 5\text{H}_2\text{O}$  (248 mg, 1 mmol, 5 equiv.) in  $\text{H}_2\text{O}$  (1 mL) in a Schlenk tube was heated at 80 °C for 2 h. After cooled to room temperature, **1v** (60.2 mg, 0.2 mmol, 1 equiv.) was added to the solution, stirred for 15 min at room temperature, then  $\text{BF}_3 \cdot \text{Et}_2\text{O}$  (25  $\mu\text{L}$ , 0.2 mmol, 1 equiv.) was added. The mixture was stirred at room temperature for 12 h. After the reaction was complete,  $\text{EtOAc}$  (5 mL) was added at room temperature, the combined mixture was dried over anhydrous  $\text{MgSO}_4$ , then filtrated through celite, washed with  $\text{EtOAc}$  (5 mL x 3), the mixture was evaporated under vacuum and purified by flash column chromatography (petroleum ether/ethyl acetate 100:1) to afford the desired product 2-(4-(benzylthio)phenyl)-4,4,5,5-tetramethyl-1,3,2-dioxaborolane (**2v**): (42.4 mg, 65%), white solid.  $^1\text{H}$  NMR (400 MHz,  $\text{CDCl}_3$ )  $\delta$ : 7.68 (d,  $J = 8$  Hz, 2 H), 7.32 (t,  $J = 7.2$  Hz, 3 H), 7.28 (s, 3 H), 7.23 (s, 1 H), 4.17 (s, 2 H), 1.33 (s, 12 H);  $^{13}\text{C}$  NMR (100 MHz,  $\text{CDCl}_3$ )  $\delta$ : 140.7, 137.0, 135.1, 128.8, 128.6, 127.4, 127.3, 83.8, 37.8, 24.9; IR (neat):  $\nu = 2976, 2930, 2903, 2251, 1596, 1361, 1130, 1050, 909, 733$ ; MS  $m/z$ : 326.

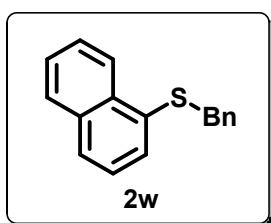

A mixture of  $\text{CuSO}_4 \cdot 5\text{H}_2\text{O}$  (5.0 mg, 10 mol%), **L2** (3.1 mg, 10 mol%),  $\text{BnCl}$  (126 mg, 1 mmol, 5 equiv.) and  $\text{Na}_2\text{S}_2\text{O}_3 \cdot 5\text{H}_2\text{O}$  (248 mg, 1 mmol, 5 equiv.) in  $\text{H}_2\text{O}$  (1 mL) in a Schlenk tube was heated at 80 °C for 2 h. After cooled to room temperature, **1w** (45.0 mg, 0.2 mmol, 1 equiv.) was added to the solution, stirred for 15 min at room temperature, then  $\text{BF}_3 \cdot \text{Et}_2\text{O}$  (25  $\mu\text{L}$ , 0.2 mmol, 1 equiv.) was added. The mixture was allowed to 50 °C for 12 h. After the reaction was complete,  $\text{EtOAc}$  (5 mL) was added at room temperature, the combined mixture was dried over anhydrous  $\text{MgSO}_4$ , then filtrated through celite, washed with  $\text{EtOAc}$  (5 mL x 3), the mixture was evaporated under vacuum and purified by flash column chromatography (petroleum ether/ethyl acetate 200:1) to afford the desired

product benzyl(naphthalen-1-yl)sulfane (**2w**): (42.0 mg, 84%), white solid.  $^1\text{H}$  NMR (400 MHz,  $\text{CDCl}_3$ )  $\delta$ : 8.49 (d,  $J = 7.2$  Hz, 1 H), 7.90 (d,  $J = 7.2$  Hz, 1 H), 7.80 (d,  $J = 8.4$  Hz, 1 H), 7.52-7.61 (m, 3 H), 7.40-7.42 (m, 1 H), 7.28-7.32 (m, 5 H), 4.21 (s, 2 H);  $^{13}\text{C}$  NMR (100 MHz,  $\text{CDCl}_3$ )  $\delta$ : 137.4, 133.9, 133.4, 133.0, 128.6, 128.5, 127.7, 127.2, 126.5, 126.3, 125.6, 125.1, 39.4; IR (neat):  $\nu = 2974, 2902, 1493, 1458, 1378, 1231, 1054, 773, 729, 679$ ; MS  $m/z$ : 250.

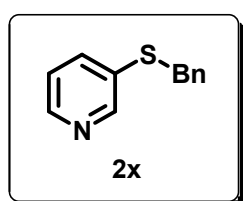

A mixture of  $\text{CuSO}_4 \cdot 5\text{H}_2\text{O}$  (5.0 mg, 10 mol%), **L2** (3.1 mg, 10 mol%),  $\text{BnCl}$  (126 mg, 1 mmol, 5 equiv.) and  $\text{Na}_2\text{S}_2\text{O}_3 \cdot 5\text{H}_2\text{O}$  (248 mg, 1 mmol, 5 equiv.) in  $\text{H}_2\text{O}$  (1 mL) in a Schlenk tube was heated at 80 °C for 2 h. After cooled to room temperature, **1x** (35.2 mg, 0.2 mmol, 1 equiv.) was added to the solution, stirred for 15 min at room temperature, then  $\text{BF}_3 \cdot \text{Et}_2\text{O}$  (25  $\mu\text{L}$ , 0.2 mmol, 1 equiv.) was added. The mixture was allowed to 80 °C for 6 h. After the reaction was complete,  $\text{EtOAc}$  (5 mL) was added at room temperature, the combined mixture was dried over anhydrous  $\text{MgSO}_4$ , then filtrated through celite, washed with  $\text{EtOAc}$  (5 mL x 3), the mixture was evaporated under vacuum and purified by flash column chromatography (petroleum ether/ethyl acetate 100:1) to afford the desired product 3-(benzylthio)pyridine (**2x**): (22.5 mg, 56%), white solid.  $^1\text{H}$  NMR (400 MHz,  $\text{CDCl}_3$ )  $\delta$ : 8.45 (d,  $J = 2$  Hz, 1 H), 8.35 (dd,  $J_1 = 1.2$  Hz,  $J_2 = 4.8$  Hz, 1 H), 7.47-7.50 (m, 1 H), 7.16-7.21 (m, 5 H), 7.08 (dd,  $J_1 = 4.7$  Hz,  $J_2 = 7.6$  Hz, 1 H), 4.03 (s, 2 H);  $^{13}\text{C}$  NMR (100 MHz,  $\text{CDCl}_3$ )  $\delta$ : 151.2, 147.6, 138.2, 136.8, 133.0, 128.8, 128.6, 127.5, 123.5, 39.2; IR (neat):  $\nu = 2972, 2883, 1379, 1088, 1046, 881$ ; MS  $m/z$ : 201.

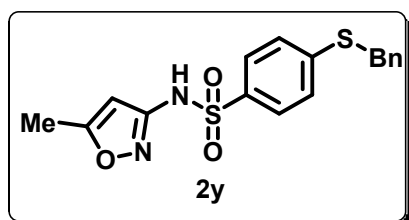

A mixture of  $\text{CuSO}_4 \cdot 5\text{H}_2\text{O}$  (5.0 mg, 10 mol%), **L2** (3.1 mg, 10 mol%),  $\text{BnCl}$  (126 mg, 1 mmol, 5 equiv.) and  $\text{Na}_2\text{S}_2\text{O}_3 \cdot 5\text{H}_2\text{O}$  (248 mg, 1 mmol, 5 equiv.) in  $\text{H}_2\text{O}$  (1 mL) in a Schlenk tube was

heated at 80 °C for 2 h. After cooled to room temperature, **1y** (67.0 mg, 0.2 mmol, 1 equiv.) was added to the solution, stirred for 15 min at room temperature, then  $\text{BF}_3 \cdot \text{Et}_2\text{O}$  (25  $\mu\text{L}$ , 0.2 mmol, 1 equiv.) was added. The mixture was stirred at 80 °C for 6 h. After the reaction was complete, EtOAc (5 mL) was added at room temperature, the combined mixture was dried over anhydrous  $\text{MgSO}_4$ , then filtrated through celite, washed with EtOAc (5 mL x 3), the mixture was evaporated under vacuum and purified by flash column chromatography (petroleum ether/ethyl acetate 2:1-1:2) to afford the desired product 4-(Benzylthio)-N-(5-methylisoxazol-3-yl)benzenesulfonamide (**2y**): (46.8 mg, 65%), white solid.  $^1\text{H}$  NMR (400 MHz,  $\text{CDCl}_3$ )  $\delta$ : 11.39 (br, 1 H), 7.72 (d,  $J = 8.0$  Hz, 2 H), 7.51 (d,  $J = 8.0$  Hz, 2 H), 7.40-7.42 (m, 2 H), 7.30-7.34 (m, 2 H), 7.23-7.27 (m, 1 H), 6.13 (s, 1 H), 4.36 (s, 2 H), 2.29 (s, 2 H);  $^{13}\text{C}$  NMR (100 MHz,  $\text{CDCl}_3$ )  $\delta$ : 170.3, 157.4, 144.3, 135.6, 127.3, 127.1, 126.6, 95.4, 35.1, 12.0; IR (neat):  $\nu = 3088, 2903, 2853, 1614, 1463, 1464, 1400, 1343, 1261, 1170, 1076, 1032, 930, 816, 799, 758, 719, 682$ ; MS  $m/z$ : 360.

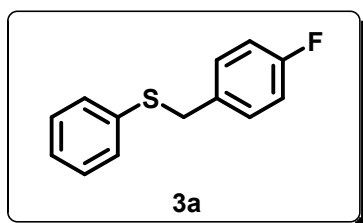

A mixture of  $\text{CuSO}_4 \cdot 5\text{H}_2\text{O}$  (5.0 mg, 10 mol%), **L2** (3.1 mg, 10 mol%), 1-(chloromethyl)-4-fluorobenzene (144 mg, 1 mmol, 5 equiv.) and  $\text{Na}_2\text{S}_2\text{O}_3 \cdot 5\text{H}_2\text{O}$  (248 mg, 1 mmol, 5 equiv.) in  $\text{H}_2\text{O}$  (1 mL) in a Schlenk tube was heated at 80 °C for 2 h. After cooled to room temperature, **1a** (35.0 mg, 0.2 mmol, 1 equiv.) was added to the solution, stirred for 15 min at room temperature, then  $\text{BF}_3 \cdot \text{Et}_2\text{O}$  (25  $\mu\text{L}$ , 0.2 mmol, 1 equiv.) was added. The mixture was stirred at room temperature for 12 h. After the reaction was complete, EtOAc (5 mL) was added at room temperature, the combined mixture was dried over anhydrous  $\text{MgSO}_4$ , then filtrated through celite, washed with EtOAc (5 mL x 3), the mixture was evaporated under vacuum and purified by flash column chromatography (petroleum ether/ethyl acetate 200:1) to afford the desired product (4-fluorobenzyl)(phenyl)sulfane (**3a**): (31.0 mg, 71%), white solid.  $^1\text{H}$  NMR (400 MHz,  $\text{CDCl}_3$ )  $\delta$ : 7.13-7.22 (m, 7 H), 6.88 (t,  $J = 8.7$  Hz, 2 H), 3.99 (s, 2 H);  $^{19}\text{F}$  NMR ( $\text{CDCl}_3$ , 376 MHz):  $\delta$  -115.4 (s, 1 F);  $^{13}\text{C}$

NMR (100 MHz, CDCl<sub>3</sub>)  $\delta$  162.0 (d,  $J_{C-F}$  = 244 Hz), 135.9, 133.3 (d,  $J_{C-F}$  = 3.2 Hz), 130.4 (d,  $J_{C-F}$  = 8 Hz), 130.2, 128.9, 126.6, 115.3 (d,  $J_{C-F}$  = 21 Hz), 38.4; IR (neat):  $\nu$  = 3063, 2920, 2853 1688, 1597, 1500, 1478 ,1224, 1153, 1068, 1012, 834, 756, 730, 687; MS: 218.

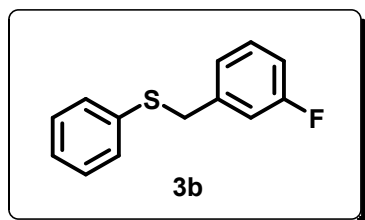

A mixture of CuSO<sub>4</sub>·5H<sub>2</sub>O (5.0 mg, 10 mol%), **L2** (3.1 mg, 10 mol%), 1-(chloromethyl)-3-fluorobenzene (144 mg, 1 mmol, 5 equiv.) and Na<sub>2</sub>S<sub>2</sub>O<sub>3</sub>·5H<sub>2</sub>O (248 mg, 1 mmol, 5 equiv.) in H<sub>2</sub>O (1 mL) in a Schlenk tube was heated at 80 °C for 2 h. After cooled to room temperature, **1a** (35.0 mg, 0.2 mmol, 1 equiv.) was added to the solution, stirred for 15 min at room temperature, then BF<sub>3</sub>·Et<sub>2</sub>O (25  $\mu$ L, 0.2 mmol, 1 equiv.) was added. The mixture was stirred at room temperature for 12 h. After the reaction was complete, EtOAc (5 mL) was added at room temperature, the combined mixture was dried over anhydrous MgSO<sub>4</sub>, then filtrated through celite, washed with EtOAc (5 mL x 3), the mixture was evaporated under vacuum and purified by flash column chromatography (petroleum ether/ethyl acetate 200:1) to afford the desired product (3-fluorobenzyl)(phenyl)sulfane (**3b**): (36.2 mg, 83%), white solid. <sup>1</sup>H NMR (400 MHz, CDCl<sub>3</sub>)  $\delta$ : 7.19-7.23 (m, 3 H), 7.16-7.18 (m, 2 H), 7.11-7.14 (m, 1 H), 6.91-6.97 (m, 2 H), 6.84-6.86 (m, 1 H), 4.00 (s, 2 H); <sup>19</sup>F NMR (CDCl<sub>3</sub>, 376 MHz):  $\delta$  -113.2 (s, 1 F); <sup>13</sup>C NMR (100 MHz, CDCl<sub>3</sub>)  $\delta$  162.8 (d,  $J_{C-F}$  = 244 Hz), 140.2 (d,  $J_{C-F}$  = 7.4 Hz), 135.7, 130.2, 129.9 (d,  $J_{C-F}$  = 8.3 Hz), 129.0, 126.7, 124.4 (d,  $J_{C-F}$  = 2.8 Hz), 115.7 (d,  $J_{C-F}$  = 22 Hz), 114.1 (d,  $J_{C-F}$  = 21 Hz), 38.7 (d,  $J_{C-F}$  = 1.7 Hz); IR (neat):  $\nu$  = 3059, 2926, 1587, 1484, 1587, 1484, 1444, 1256, 1137, 1071, 943, 784 ,687; HRMS (FAB): Calcd for C<sub>13</sub>H<sub>11</sub>FS: 218.0565, Found 218.564.

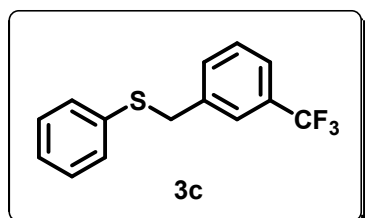

A mixture of CuSO<sub>4</sub>·5H<sub>2</sub>O (5.0 mg, 10 mol%), **L2** (3.1 mg, 10 mol%), 1-(chloromethyl)-3-

(trifluoromethyl)benzene (194 mg, 1 mmol, 5 equiv.) and  $\text{Na}_2\text{S}_2\text{O}_3 \cdot 5\text{H}_2\text{O}$  (248 mg, 1 mmol, 5 equiv.) in  $\text{H}_2\text{O}$  (1 mL) in a Schlenk tube was heated at 80 °C for 2 h. After cooled to room temperature, **1a** (35.0 mg, 0.2 mmol, 1 equiv.) was added to the solution, stirred for 15 min at room temperature, then  $\text{BF}_3 \cdot \text{Et}_2\text{O}$  (25  $\mu\text{L}$ , 0.2 mmol, 1 equiv.) was added. The mixture was stirred at room temperature for 12 h. After the reaction was complete, EtOAc (5 mL) was added at room temperature, the combined mixture was dried over anhydrous  $\text{MgSO}_4$ , then filtrated through celite, washed with EtOAc (5 mL x 3), the mixture was evaporated under vacuum and purified by flash column chromatography (petroleum ether/ethyl acetate 200:1) to afford the desired product phenyl(3-(trifluoromethyl)benzyl)sulfane (**3c**): (38.6 mg, 72%), white solid.  $^1\text{H}$  NMR (400 MHz,  $\text{CDCl}_3$ )  $\delta$ : 7.36-7.42 (m, 3 H), 7.31 (t,  $J = 1.8$  Hz, 1 H), 7.14-7.22 (m, 5 H), 4.05 (s, 2 H);  $^{19}\text{F}$  NMR ( $\text{CDCl}_3$ , 376 MHz):  $\delta$  -62.5 (s, 3 F);  $^{13}\text{C}$  NMR (100 MHz,  $\text{CDCl}_3$ )  $\delta$  138.7, 135.1, 132.2, 130.7, 129.0, 128.9, 127.0, 125.6 (q,  $J_{\text{C-F}} = 38$  Hz), 125.4, 124.0 (q,  $J_{\text{C-F}} = 38$  Hz), 122.6, 39.0; IR (neat):  $\nu = 3026, 1585, 1479, 1449, 1329, 1163, 1120, 1071, 906, 802, 739, 697$ ; MS: 268.

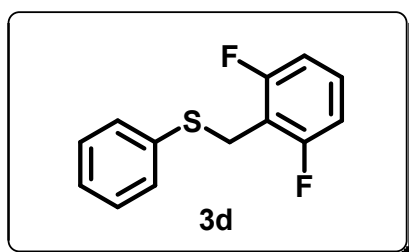

A mixture of  $\text{CuSO}_4 \cdot 5\text{H}_2\text{O}$  (5.0 mg, 10 mol%), **L2** (3.1 mg, 10 mol%), 2-(chloromethyl)-1,3-difluorobenzene (162 mg, 1 mmol, 5 equiv.) and  $\text{Na}_2\text{S}_2\text{O}_3 \cdot 5\text{H}_2\text{O}$  (248 mg, 1 mmol, 5 equiv.) in  $\text{H}_2\text{O}$  (1 mL) in a Schlenk tube was heated at 80 °C for 2 h. After cooled to room temperature, **1a** (35.0 mg, 0.2 mmol, 1 equiv.) was added to the solution, stirred for 15 min at room temperature, then  $\text{BF}_3 \cdot \text{Et}_2\text{O}$  (25  $\mu\text{L}$ , 0.2 mmol, 1 equiv.) was added. The mixture was stirred at room temperature for 12 h. After the reaction was complete, EtOAc (5 mL) was added at room temperature, the combined mixture was dried over anhydrous  $\text{MgSO}_4$ , then filtrated through celite, washed with EtOAc (5 mL x 3), the mixture was evaporated under vacuum and purified by flash column chromatography (petroleum ether/ethyl acetate 200:1) to afford the desired product (2,6-difluorobenzyl)(phenyl)sulfane (**3d**): (39.6 mg, 84%), white solid.  $^1\text{H}$  NMR (400 MHz,  $\text{CDCl}_3$ )  $\delta$ : 7.30 (dd,  $J_1 = 0.5$  Hz,  $J_2 = 8$  Hz, 2 H), 7.15-7.20 (m, 3 H),

7.07-7.09 (m, 1 H), 6.74 (t,  $J = 8$  Hz, 2 H), 4.04 (s, 2 H);  $^{19}\text{F}$  NMR ( $\text{CDCl}_3$ , 376 MHz):  $\delta$  -114.6 (s, 2 F);  $^{13}\text{C}$  NMR (100 MHz,  $\text{CDCl}_3$ )  $\delta$  161.2 (dd,  $J_{\text{C-F1}} = 248$  Hz,  $J_{\text{C-F2}} = 7.7$  Hz), 135.0, 131.8, 128.9, 128.8, 128.8 (t,  $J_{\text{C-F}} = 10.1$  Hz), 127.3, 114.4 (t,  $J_{\text{C-F}} = 19$  Hz), 111.2 (dd,  $J_{\text{C-F1}} = 37.8$  Hz,  $J_{\text{C-F2}} = 6.2$  Hz), 26.8 (t,  $J_{\text{C-F}} = 2.5$  Hz); IR (neat):  $\nu = 3072, 2945, 1624, 1590, 1469, 1439, 1272, 1237, 1171, 995, 785, 737, 691$ ; HRMS (FAB): Calcd for  $\text{C}_{13}\text{H}_{10}\text{F}_2\text{S}$ : 236.0471, Found 236.0474.

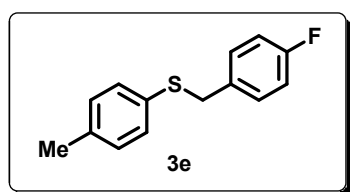

A mixture of  $\text{CuSO}_4 \cdot 5\text{H}_2\text{O}$  (5.0 mg, 10 mol%), **L2** (3.1 mg, 10 mol%), 1-(chloromethyl)-4-fluorobenzene (144 mg, 1 mmol, 5 equiv.) and  $\text{Na}_2\text{S}_2\text{O}_3 \cdot 5\text{H}_2\text{O}$  (248 mg, 1 mmol, 5 equiv.) in  $\text{H}_2\text{O}$  (1 mL) in a Schlenk tube was heated at 80 °C for 2 h. After cooled to room temperature, **1b** (37.8 mg, 0.2 mmol, 1 equiv.) was added to the solution, stirred for 15 min at room temperature, then  $\text{BF}_3 \cdot \text{Et}_2\text{O}$  (25  $\mu\text{L}$ , 0.2 mmol, 1 equiv.) was added. The mixture was stirred at room temperature for 12 h. After the reaction was complete, EtOAc (5 mL) was added at room temperature, the combined mixture was dried over anhydrous  $\text{MgSO}_4$ , then filtrated through celite, washed with EtOAc (5 mL x 3), the mixture was evaporated under vacuum and purified by flash column chromatography (petroleum ether/ethyl acetate 100:1) to afford the desired product (4-fluorobenzyl)(*p*-tolyl)sulfane (**3e**): (32.9 mg, 71%), white solid.  $^1\text{H}$  NMR (400 MHz,  $\text{CDCl}_3$ )  $\delta$ : 7.11-7.14 (m, 4 H), 6.99 (d,  $J = 8$  Hz, 2 H), 6.85-6.90 (m, 2 H), 3.95 (s, 2 H), 2.24 (s, 3 H);  $^{19}\text{F}$  NMR ( $\text{CDCl}_3$ , 376 MHz):  $\delta$  -115.6 (s, 1 F);  $^{13}\text{C}$  NMR (100 MHz,  $\text{CDCl}_3$ )  $\delta$  161.9 (d,  $J_{\text{C-F}} = 244$  Hz), 136.9, 136.6 (d,  $J_{\text{C-F}} = 3$  Hz), 131.9, 131.1, 130.4 (d,  $J_{\text{C-F}} = 8$  Hz), 129.7, 115.3 (d,  $J_{\text{C-F}} = 21$  Hz), 39.1, 21.1; IR (neat):  $\nu = 2949, 2844, 1714, 1602, 1511, 1433, 1246, 1166, 1026, 829$ ; MS  $m/z$ : 232.

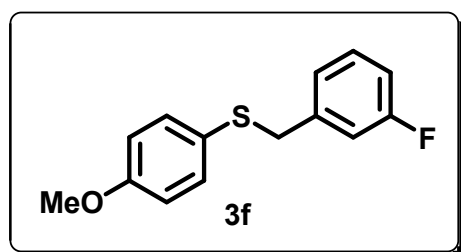

A mixture of  $\text{CuSO}_4 \cdot 5\text{H}_2\text{O}$  (5.0 mg, 10 mol%), **L2** (3.1 mg, 10 mol%), 1-(chloromethyl)-3-

fluorobenzene (144 mg, 1 mmol, 5 equiv.) and  $\text{Na}_2\text{S}_2\text{O}_3 \cdot 5\text{H}_2\text{O}$  (248 mg, 1 mmol, 5 equiv.) in  $\text{H}_2\text{O}$  (1 mL) in a Schlenk tube was heated at 80 °C for 2 h. After cooled to room temperature, **1d** (41.0 mg, 0.2 mmol, 1 equiv.) was added to the solution, stirred for 15 min at room temperature, then  $\text{BF}_3 \cdot \text{Et}_2\text{O}$  (25  $\mu\text{L}$ , 0.2 mmol, 1 equiv.) was added. The mixture was stirred at room temperature for 12 h. After the reaction was complete, EtOAc (5 mL) was added at room temperature, the combined mixture was dried over anhydrous  $\text{MgSO}_4$ , then filtrated through celite, washed with EtOAc (5 mL x 3), the mixture was evaporated under vacuum and purified by flash column chromatography (petroleum ether/ethyl acetate 100:1) to afford the desired product (3-fluorobenzyl)(4-methoxyphenyl)sulfane (**3f**): (44.6 mg, 90%), white solid.  $^1\text{H}$  NMR (400 MHz,  $\text{CDCl}_3$ )  $\delta$ : 7.16-7.18 (m, 2 H), 6.81-6.87 (m, 4 H), 6.70-6.73 (m, 2 H), 3.87 (s, 2 H), 3.71 (s, 3 H);  $^{19}\text{F}$  NMR ( $\text{CDCl}_3$ , 376 MHz):  $\delta$  -113.4 (s, 1 F);  $^{13}\text{C}$  NMR (100 MHz,  $\text{CDCl}_3$ )  $\delta$  162.7 (d,  $J_{\text{C-F}} = 244$  Hz), 159.4, 140.8 (d,  $J_{\text{C-F}} = 7.3$  Hz), 134.4, 129.7 (d,  $J_{\text{C-F}} = 8.2$  Hz), 125.4, 124.5 (d,  $J_{\text{C-F}} = 2.8$  Hz), 115.7 (d,  $J_{\text{C-F}} = 22$  Hz), 114.5, 113.9 (d,  $J_{\text{C-F}} = 21$  Hz), 55.3, 40.9 (d,  $J_{\text{C-F}} = 1.7$  Hz); IR (neat):  $\nu = 2983, 2898, 1592, 1493, 1331, 1256, 1247, 1171, 1130, 1074, 910, 736$ ; HRMS (FAB): Calcd for  $\text{C}_{14}\text{H}_{13}\text{FOS}$ : 248.0671, Found 248.0672.

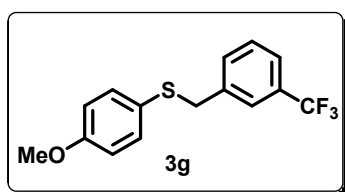

A mixture of  $\text{CuSO}_4 \cdot 5\text{H}_2\text{O}$  (5.0 mg, 10 mol%), **L2** (3.1 mg, 10 mol%), 1-(chloromethyl)-3-(trifluoromethyl)benzene (194 mg, 1 mmol, 5 equiv.) and  $\text{Na}_2\text{S}_2\text{O}_3 \cdot 5\text{H}_2\text{O}$  (248 mg, 1 mmol, 5 equiv.) in  $\text{H}_2\text{O}$  (1 mL) in a Schlenk tube was heated at 80 °C for 2 h. After cooled to room temperature, **1d** (41.0 mg, 0.2 mmol, 1 equiv.) was added to the solution, stirred for 15 min at room temperature, then  $\text{BF}_3 \cdot \text{Et}_2\text{O}$  (25  $\mu\text{L}$ , 0.2 mmol, 1 equiv.) was added. The mixture was stirred at room temperature for 12 h. After the reaction was complete, EtOAc (5 mL) was added at room temperature, the combined mixture was dried over anhydrous  $\text{MgSO}_4$ , then filtrated through celite, washed with EtOAc (5 mL x 3), the mixture was evaporated under vacuum and purified by flash column chromatography



(petroleum ether/ethyl acetate 100:1) to afford the desired product (4-methoxyphenyl)(3-(trifluoromethyl)benzyl)sulfane (**3g**): (47.1 mg, 79%) white solid.  $^1\text{H}$  NMR (400 MHz,  $\text{CDCl}_3$ )  $\delta$ : 7.46-7.47 (m, 1 H), 7.34-7.36 (m, 3 H), 7.20-7.22 (m, 2 H), 6.77-6.80 (m, 2 H), 3.98 (s, 2 H), 3.78 (s, 3 H);  $^{19}\text{F}$  NMR ( $\text{CDCl}_3$ , 376 MHz):  $\delta$  -62.6 (s, 3 F);  $^{13}\text{C}$  NMR (100 MHz,  $\text{CDCl}_3$ )  $\delta$  159.6, 139.3, 134.9, 132.2, 128.8, 125.7 (q,  $J_{\text{C-F}} = 3.8$  Hz), 124.8, 123.8 (q,  $J_{\text{C-F}} = 3.7$  Hz), 114.6, 55.3, 41.0; IR (neat):  $\nu = 2973, 2286, 1592, 1331, 1089, 1048, 881$ ; HRMS (FAB): Calcd for  $\text{C}_{15}\text{H}_{13}\text{F}_3\text{OS}$ : 298.0639, Found 298.0637.

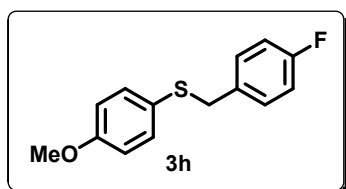

A mixture of  $\text{CuSO}_4 \cdot 5\text{H}_2\text{O}$  (5.0 mg, 10 mol%), **L2** (3.1 mg, 10 mol%), 1-(chloromethyl)-4-fluorobenzene (144 mg, 1 mmol, 5 equiv.) and  $\text{Na}_2\text{S}_2\text{O}_3 \cdot 5\text{H}_2\text{O}$  (248 mg, 1 mmol, 5 equiv.) in  $\text{H}_2\text{O}$  (1 mL) in a Schlenk tube was heated at 80 °C for 2 h. After cooled to room temperature, **1d** (41.0 mg, 0.2 mmol, 1 equiv.) was added to the solution, stirred for 15 min at room temperature, then  $\text{BF}_3 \cdot \text{Et}_2\text{O}$  (25  $\mu\text{L}$ , 0.2 mmol, 1 equiv.) was added. The mixture was stirred at room temperature for 12 h. After the reaction was complete, EtOAc (5 mL) was added at room temperature, the combined mixture was dried over anhydrous  $\text{MgSO}_4$ , then filtrated through celite, washed with EtOAc (5 mL x 3), the mixture was evaporated under vacuum and purified by flash column chromatography (petroleum ether/ethyl acetate 100:1) to afford the desired product (4-fluorobenzyl)(4-methoxyphenyl)sulfane (**3h**): (32.2 mg, 65%), white solid.  $^1\text{H}$  NMR (400 MHz,  $\text{CDCl}_3$ )  $\delta$ : 7.14-7.18 (m, 2 H), 7.03-7.06 (m, 2 H), 6.83-6.87 (m, 2 H), 6.70-6.72 (m, 2 H), 3.86 (s, 2 H), 3.70 (s, 3 H);  $^{19}\text{F}$  NMR ( $\text{CDCl}_3$ , 376 MHz):  $\delta$  -115.7 (d,  $J = 4.5$  Hz, 1 F);  $^{13}\text{C}$  NMR (100 MHz,  $\text{CDCl}_3$ )  $\delta$  161.9 (d,  $J_{\text{C-F}} = 244$  Hz), 159.4, 134.4, 134.0 (d,  $J_{\text{C-F}} = 3.2$  Hz), 130.4 (d,  $J_{\text{C-F}} = 8.0$  Hz), 125.6, 115.2 (d,  $J_{\text{C-F}} = 11.3$  Hz), 114.5, 55.3, 40.5; IR (neat):  $\nu = 2965, 2919, 1896, 1594, 1508, 1492, 1332, 1285, 1177, 1155, 1027, 812, 756$ ; HRMS (FAB): Calcd for  $\text{C}_{14}\text{H}_{13}\text{FOS}$ : 248.0671, Found 248.0673.

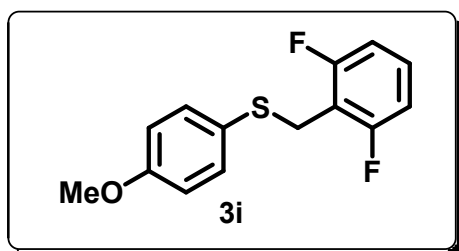

A mixture of  $\text{CuSO}_4 \cdot 5\text{H}_2\text{O}$  (5.0 mg, 10 mol%), **L2** (3.1 mg, 10 mol%), 2-(chloromethyl)-1,3-difluorobenzene (162 mg, 1 mmol, 5 equiv.) and  $\text{Na}_2\text{S}_2\text{O}_3 \cdot 5\text{H}_2\text{O}$  (248 mg, 1 mmol, 5 equiv.) in  $\text{H}_2\text{O}$  (1 mL) in a Schlenk tube was heated at 80 °C for 2 h. After cooled to room temperature, **1d** (41.0 mg, 0.2 mmol, 1 equiv.) was added to the solution, stirred for 15 min at room temperature, then  $\text{BF}_3 \cdot \text{Et}_2\text{O}$  (25  $\mu\text{L}$ , 0.2 mmol, 1 equiv.) was added. The mixture was stirred at room temperature for 12 h. After the reaction was complete, EtOAc (5 mL) was added at room temperature, the combined mixture was dried over anhydrous  $\text{MgSO}_4$ , then filtrated through celite, washed with EtOAc (5 mL x 3), the mixture was evaporated under vacuum and purified by flash column chromatography (petroleum ether/ethyl acetate 100:1) to afford the desired product (2,6-difluorobenzyl)(4-methoxyphenyl)sulfane (**3i**): (38.8 mg, 73%), white solid.  $^1\text{H}$  NMR (400 MHz,  $\text{CDCl}_3$ )  $\delta$ : 7.21-7.23 (m, 2 H), 7.08-7.18 (m, 1 H), 6.69-6.74 (m, 4 H), 3.93 (s, 2 H), 3.71 (s, 3 H);  $^{19}\text{F}$  NMR ( $\text{CDCl}_3$ , 376 MHz):  $\delta$  -114.9 (s, 2 F);  $^{13}\text{C}$  NMR (100 MHz,  $\text{CDCl}_3$ )  $\delta$  161.2 (dd,  $J_{\text{C-F1}} = 248$  Hz,  $J_{\text{C-F2}} = 7.9$  Hz), 159.8, 135.6, 131.9, 128.7, 128.6, 128.5, 124.9, 114.4, 111.1 (dd,  $J_{\text{C-F1}} = 16.5$  Hz,  $J_{\text{C-F2}} = 6.3$  Hz), 55.3, 28.3; IR (neat):  $\nu = 2964, 2839, 2228, 1624, 1589, 1492, 1467, 1272, 1239, 1176, 1023, 996, 826, 784, 736$ ; HRMS (FAB): Calcd for  $\text{C}_{14}\text{H}_{12}\text{F}_2\text{OS}$ : 266.0577, Found 266.0576.

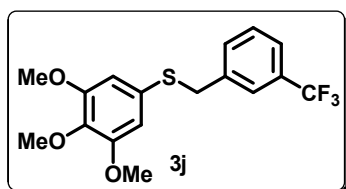

A mixture of  $\text{CuSO}_4 \cdot 5\text{H}_2\text{O}$  (5.0 mg, 10 mol%), **L2** (3.1 mg, 10 mol%), 1-(chloromethyl)-3-(trifluoromethyl)benzene (194 mg, 1 mmol, 5 equiv.) and  $\text{Na}_2\text{S}_2\text{O}_3 \cdot 5\text{H}_2\text{O}$  (248 mg, 1 mmol, 5 equiv.) in  $\text{H}_2\text{O}$  (1 mL) in a Schlenk tube was heated at 80 °C for 2 h. After cooled to room temperature, **1p** (53.0 mg, 0.2 mmol, 1 equiv.) was added to the solution, stirred for 15 min at room temperature, then  $\text{BF}_3 \cdot \text{Et}_2\text{O}$  (25  $\mu\text{L}$ , 0.2 mmol, 1 equiv.) was added.

The mixture was stirred at room temperature for 12 h. After the reaction was complete, EtOAc (5 mL) was added at room temperature, the combined mixture was dried over anhydrous MgSO<sub>4</sub>, then filtrated through celite, washed with EtOAc (5 mL x 3), the mixture was evaporated under vacuum and purified by flash column chromatography (petroleum ether/ethyl acetate 50:1) to afford the desired product (3-(trifluoromethyl)benzyl)(3,4,5-trimethoxyphenyl)sulfane (**3j**): (52.2 mg, 73%), white solid. <sup>1</sup>H NMR (400 MHz, CDCl<sub>3</sub>) δ: 7.47-7.49 (m, 1 H), 7.43 (s, 1 H), 7.38-7.40 (m, 2 H), 6.48 (s, 2 H), 4.05 (s, 2 H), 3.80 (s, 3 H), 3.73 (s, 6 H); <sup>19</sup>F NMR (CDCl<sub>3</sub>, 376 MHz): δ -62.6 (s, 3 F); <sup>13</sup>C NMR (100 MHz, CDCl<sub>3</sub>) δ 153.2, 139.1, 137.8, 132.31, 132.30, 130.8, 130.5, 129.2, 129.0, 125.7 (q, *J*<sub>C-F</sub> = 3.8 Hz), 129.9 (q, *J*<sub>C-F</sub> = 3.8 Hz), 109.4, 60.9, 56.0, 40.2; IR (neat): ν = 2985, 2941, 2905, 2254, 1736, 1580, 1498, 1374, 1237, 1125, 1045, 917, 731; HRMS (FAB): Calcd for C<sub>17</sub>H<sub>17</sub>F<sub>3</sub>O<sub>3</sub>S: 358.0850, Found 358.0847.

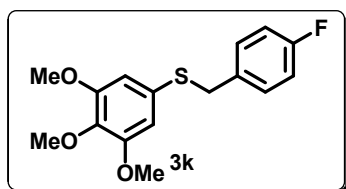

A mixture of CuSO<sub>4</sub>·5H<sub>2</sub>O (5.0 mg, 10 mol%), **L2** (3.1 mg, 10 mol%), 1-(chloromethyl)-4-fluorobenzene (144 mg, 1 mmol, 5 equiv.) and Na<sub>2</sub>S<sub>2</sub>O<sub>3</sub>·5H<sub>2</sub>O (248 mg, 1 mmol, 5 equiv.) in H<sub>2</sub>O (1 mL) in a Schlenk tube was heated at 80 °C for 2 h. After cooled to room temperature, **1p** (53.0 mg, 0.2 mmol, 1 equiv.) was added to the solution, stirred for 15 min at room temperature, then BF<sub>3</sub>·Et<sub>2</sub>O (25 μL, 0.2 mmol, 1 equiv.) was added. The mixture was stirred at room temperature for 12 h. After the reaction was complete, EtOAc (5 mL) was added at room temperature, the combined mixture was dried over anhydrous MgSO<sub>4</sub>, then filtrated through celite, washed with EtOAc (5 mL x 3), the mixture was evaporated under vacuum and purified by flash column chromatography (petroleum ether/ethyl acetate 50:1) to afford the desired product (4-fluorobenzyl)(3,4,5-trimethoxyphenyl)sulfane (**3k**): (32.6 mg, 53%), white solid. <sup>1</sup>H NMR (400 MHz, CDCl<sub>3</sub>) δ: 7.18-7.21 (m, 2 H), 6.94-6.98 (m, 2 H), 6.49 (s, 2 H), 4.01 (s, 2 H), 3.81 (s, 3 H), 3.76 (s, 6 H); <sup>19</sup>F NMR (CDCl<sub>3</sub>, 376 MHz): δ -115.3 (s, 1 F); <sup>13</sup>C NMR (100

MHz, CDCl<sub>3</sub>)  $\delta$  162.0 (d,  $J_{C-F}$  = 244 Hz), 153.2, 137.4, 133.6 (d,  $J_{C-F}$  = 3.2 Hz), 130.4 (d,  $J_{C-F}$  = 8.0 Hz), 130.0, 115.3 (d,  $J_{C-F}$  = 21.3 Hz), 108.7, 60.9, 56.1, 39.7; IR (neat):  $\nu$  = 2985, 2903, 1738, 1580, 1499, 1405, 1331, 1244, 1168, 1128, 1048, 912, 734; HRMS (FAB): Calcd for C<sub>16</sub>H<sub>17</sub>FO<sub>3</sub>S: 308.0882, Found 308.0880.

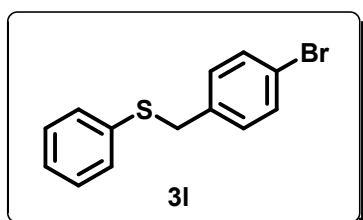

A mixture of CuSO<sub>4</sub>·5H<sub>2</sub>O (5.0 mg, 10 mol%), **L2** (3.1 mg, 10 mol%), 1-bromo-4-(chloromethyl)benzene (205 mg, 1 mmol, 5 equiv.) and Na<sub>2</sub>S<sub>2</sub>O<sub>3</sub>·5H<sub>2</sub>O (248 mg, 1 mmol, 5 equiv.) in H<sub>2</sub>O (1 mL) in a Schlenk tube was heated at 80 °C for 2 h. After cooled to room temperature, **1a** (35.0 mg, 0.2 mmol, 1 equiv.) was added to the solution, stirred for 15 min at room temperature, then BF<sub>3</sub>·Et<sub>2</sub>O (25  $\mu$ L, 0.2 mmol, 1 equiv.) was added. The mixture was stirred at room temperature for 12 h. After the reaction was complete, EtOAc (5 mL) was added at room temperature, the combined mixture was dried over anhydrous MgSO<sub>4</sub>, then filtrated through celite, washed with EtOAc (5 mL x 3), the mixture was evaporated under vacuum and purified by flash column chromatography (petroleum ether/ethyl acetate 200:1) to afford the desired product (4-bromobenzyl)(phenyl)sulfane (**31**): (27.3 mg, 49%), white solid. <sup>1</sup>H NMR (400 MHz, CDCl<sub>3</sub>)  $\delta$ : 7.31 (d,  $J$  = 8.4 Hz, 2 H), 7.16-7.22 (m, 4 H), 7.11-7.13 (m, 1 H), 7.06 (d,  $J$  = 8.4 Hz, 2 H), 3.96 (s, 2 H); <sup>13</sup>C NMR (100 MHz, CDCl<sub>3</sub>)  $\delta$  136.7, 135.6, 131.6, 130.5, 130.3, 128.9, 126.7, 121.0, 38.6; IR (neat):  $\nu$  = 3063, 2921, 1587, 1483, 827, 731, 687; MS: 279.

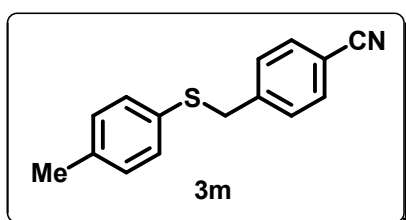

A mixture of CuSO<sub>4</sub>·5H<sub>2</sub>O (5.0 mg, 10 mol%), **L2** (3.1 mg, 10 mol%), 4-(chloromethyl)benzonitrile (151 mg, 1 mmol, 5 equiv.) and Na<sub>2</sub>S<sub>2</sub>O<sub>3</sub>·5H<sub>2</sub>O (248 mg, 1 mmol, 5 equiv.) in H<sub>2</sub>O (1 mL) in a Schlenk tube was heated at 80 °C for 2 h. After cooled to room temperature, **1b** (37.8 mg, 0.2 mmol, 1 equiv.) was added to the solution, stirred for 15 min at room

temperature, then  $\text{BF}_3 \cdot \text{Et}_2\text{O}$  (25  $\mu\text{L}$ , 0.2 mmol, 1 equiv.) was added. The mixture was stirred at room temperature for 12 h. After the reaction was complete, EtOAc (5 mL) was added at room temperature, the combined mixture was dried over anhydrous  $\text{MgSO}_4$ , then filtrated through celite, washed with EtOAc (5 mL x 3), the mixture was evaporated under vacuum and purified by flash column chromatography (petroleum ether/ethyl acetate 100:1) to afford the desired product 4-(*p*-tolylthiomethyl)benzotrile (**3m**): (38.2 mg, 80%) white solid.  $^1\text{H}$  NMR (400 MHz,  $\text{CDCl}_3$ )  $\delta$ : 7.53 (d,  $J$  = 8.4 Hz, 2 H), 7.29 (d,  $J$  = 8.0 Hz, 2 H), 7.16 (d,  $J$  = 8.0 Hz, 2 H), 7.06 (d,  $J$  = 8.0 Hz, 2 H), 4.04 (s, 2 H), 2.31 (s, 3 H);  $^{13}\text{C}$  NMR (100 MHz,  $\text{CDCl}_3$ )  $\delta$  143.8, 137.6, 132.2, 131.7, 130.8 129.8, 129.5, 118.8, 110.8, 39.9, 21.1; IR (neat):  $\nu$  = 2970, 2937, 2227, 1724, 1602, 1488, 1175, 1017, 846, 811, 682; MS  $m/z$ : 239.

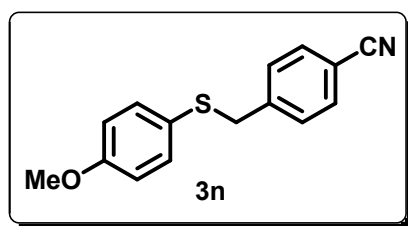

A mixture of  $\text{CuSO}_4 \cdot 5\text{H}_2\text{O}$  (5.0 mg, 10 mol%), **L2** (3.1 mg, 10 mol%), 4-(chloromethyl)benzotrile (151 mg, 1 mmol, 5 equiv.) and  $\text{Na}_2\text{S}_2\text{O}_3 \cdot 5\text{H}_2\text{O}$  (248 mg, 1 mmol, 5 equiv.) in  $\text{H}_2\text{O}$  (1 mL) in a Schlenk tube was heated at 80  $^\circ\text{C}$  for 2 h. After cooled to room temperature, **1d** (41.0 mg, 0.2 mmol, 1 equiv.) was added to the solution, stirred for 15 min at room temperature, then  $\text{BF}_3 \cdot \text{Et}_2\text{O}$  (25  $\mu\text{L}$ , 0.2 mmol, 1 equiv.) was added. The mixture was stirred at room temperature for 12 h. After the reaction was complete, EtOAc (5 mL) was added at room temperature, the combined mixture was dried over anhydrous  $\text{MgSO}_4$ , then filtrated through celite, washed with EtOAc (5 mL x 3), the mixture was evaporated under vacuum and purified by flash column chromatography (petroleum ether/ethyl acetate 100:1) to afford the desired product 4-((4-methoxyphenylthio)methyl)benzotrile (**3n**): (33.7 mg, 66%), white solid.  $^1\text{H}$  NMR (400 MHz,  $\text{CDCl}_3$ )  $\delta$ : 7.52 (d,  $J$  = 8.4 Hz, 2 H), 6.18-6.20 (m, 4 H), 6.78 (d,  $J$  = 8.8 Hz, 2 H), 3.95 (s, 2 H), 3.78 (s, 3 H);  $^{13}\text{C}$  NMR (100 MHz,  $\text{CDCl}_3$ )  $\delta$  159.7, 144.0, 134.9, 132.1, 129.6, 124.4, 118.9, 114.6, 110.7, 55.3, 41.2; IR (neat):  $\nu$  = 2958, 2921, 2225, 1735, 1605, 1503, 1413, 1249, 1177, 1076, 834, 734; HRMS (FAB): Calcd for

C<sub>15</sub>H<sub>13</sub>NOS: 255.0718, Found 255.0716.

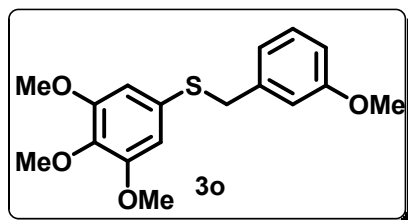

A mixture of CuSO<sub>4</sub>·5H<sub>2</sub>O (5.0 mg, 10 mol%), **L2** (3.1 mg, 10 mol%), 1-(chloromethyl)-3-methoxybenzene (156 mg, 1 mmol, 5 equiv.) and Na<sub>2</sub>S<sub>2</sub>O<sub>3</sub>·5H<sub>2</sub>O (248 mg, 1 mmol, 5 equiv.) in H<sub>2</sub>O (1 mL) in a Schlenk tube was heated at 80 °C for 2 h. After cooled to room temperature, **1p** (53.0 mg, 0.2 mmol, 1 equiv.) was added to the solution, stirred for 15 min at room temperature, then BF<sub>3</sub>·Et<sub>2</sub>O (25 μL, 0.2 mmol, 1 equiv.) was added. The mixture was stirred at room temperature for 12 h. After the reaction was complete, EtOAc (5 mL) was added at room temperature, the combined mixture was dried over anhydrous MgSO<sub>4</sub>, then filtrated through celite, washed with EtOAc (5 mL x 3), the mixture was evaporated under vacuum and purified by flash column chromatography (petroleum ether/ethyl acetate 40:1) to afford the desired product (3-methoxybenzyl)(3,4,5-trimethoxyphenyl)sulfane (**3o**): (48.0 mg, 75%), white solid. <sup>1</sup>H NMR (400 MHz, CDCl<sub>3</sub>) δ: 7.20 (t, *J* = 8.4 Hz, 2 H), 6.77-6.86 (m, 2 H), 6.52 (s, 2 H), 4.03 (s, 2 H), 3.81 (s, 3 H), 3.76 (m, 9 H); <sup>13</sup>C NMR (100 MHz, CDCl<sub>3</sub>) δ: 159.7, 153.1, 139.4, 137.2, 130.5, 129.5, 121.3, 114.3, 112.9, 108.4, 60.9, 56.1, 55.2, 40.3; IR (neat): ν = 2970, 2939, 2252, 1769, 1581, 1496, 1231, 1128, 1047, 908, 730; HRMS (FAB): Calcd for C<sub>17</sub>H<sub>20</sub>O<sub>4</sub>S: 320.1082, Found 320.1083.

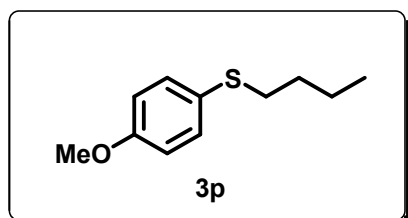

A mixture of CuSO<sub>4</sub>·5H<sub>2</sub>O (5.0 mg, 10 mol%), **L2** (3.1 mg, 10 mol%), 1-bromobutane (137 mg, 1 mmol, 5 equiv.) and Na<sub>2</sub>S<sub>2</sub>O<sub>3</sub>·5H<sub>2</sub>O (248 mg, 1 mmol, 5 equiv.) in H<sub>2</sub>O (1 mL) in a Schlenk tube was heated at 80 °C for 2 h. After cooled to room temperature, **1d** (41.0 mg, 0.2 mmol, 1 equiv.) was added to the solution, stirred for 15 min at room temperature, then BF<sub>3</sub>·Et<sub>2</sub>O (25 μL, 0.2 mmol, 1 equiv.) was added. The mixture was stirred at room

temperature for 12 h. After the reaction was complete, EtOAc (5 mL) was added at room temperature, the combined mixture was dried over anhydrous  $\text{MgSO}_4$ , then filtrated through celite, washed with EtOAc (5 mL x 3), the mixture was evaporated under vacuum and purified by flash column chromatography (petroleum ether/ethyl acetate 100:1) to afford the desired product butyl(4-methoxyphenyl)sulfane (**3p**): (23.9 mg, 61%), colorless oil.  $^1\text{H}$  NMR (400 MHz,  $\text{CDCl}_3$ )  $\delta$ : 7.26 (d,  $J = 8.0$  Hz, 2 H),  $\delta$ :6.77 (d,  $J = 8.0$  Hz, 2 H), 3.72 (s, 3 H), 2.74 (t,  $J = 8.0$  Hz, 2 H), 1.46-1.53 (m, 2 H), 1.30-1.39 (m, 2 H), 0.82 (t,  $J = 8.0$  Hz, 3 H);  $^{13}\text{C}$  NMR (100 MHz,  $\text{CDCl}_3$ )  $\delta$ : 158.7, 132.9, 127.0, 114.5, 55.3, 35.5, 31.5, 21.8, 13.6; IR (neat):  $\nu = 2957, 1593, 1493, 1286, 1245, 1034, 826, 730$ ; MS m/z: 196.

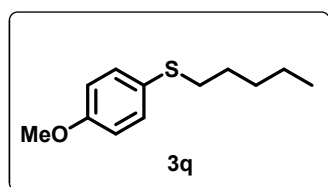

A mixture of  $\text{CuSO}_4 \cdot 5\text{H}_2\text{O}$  (5.0 mg, 10 mol%), **L2** (3.1 mg, 10 mol%), 1-bromopentane (151 mg, 1 mmol, 5 equiv.) and  $\text{Na}_2\text{S}_2\text{O}_3 \cdot 5\text{H}_2\text{O}$  (248 mg, 1 mmol, 5 equiv.) in  $\text{H}_2\text{O}$  (1 mL) in a Schlenk tube was heated at 80 °C for 2 h.

After cooled to room temperature, **1d** (41.0 mg, 0.2 mmol, 1 equiv.) was added to the solution, stirred for 15 min at room temperature, then  $\text{BF}_3 \cdot \text{Et}_2\text{O}$  (25  $\mu\text{L}$ , 0.2 mmol, 1 equiv.) was added. The mixture was stirred at room temperature for 12 h. After the reaction was complete, EtOAc (5 mL) was added at room temperature, the combined mixture was dried over anhydrous  $\text{MgSO}_4$ , then filtrated through celite, washed with EtOAc (5 mL x 3), the mixture was evaporated under vacuum and purified by flash column chromatography (petroleum ether/ethyl acetate 100:1) to afford the desired product (4-methoxyphenyl)(pentyl)sulfane (**3q**): (20.2 mg, 45%), colorless oil,  $^1\text{H}$  NMR (400 MHz,  $\text{CDCl}_3$ )  $\delta$ : 7.26 (d,  $J = 8.0$  Hz, 2 H),  $\delta$ :6.76 (d,  $J = 8.0$  Hz, 2 H), 3.72 (s, 3 H), 2.74 (t,  $J = 8.0$  Hz, 2 H), 1.47-1.53 (m, 2 H), 1.18-1.32 (m, 4 H), 0.81 (t,  $J = 8.0$  Hz, 3 H);  $^{13}\text{C}$  NMR (100 MHz,  $\text{CDCl}_3$ )  $\delta$ : 158.7, 132.9, 127.0, 114.5, 55.3, 35.8, 30.9, 29.0, 22.2, 13.9; IR (neat):  $\nu = 2927, 1593, 1493, 1462, 1284, 1243, 1033, 822$ ; MS m/z: 210.

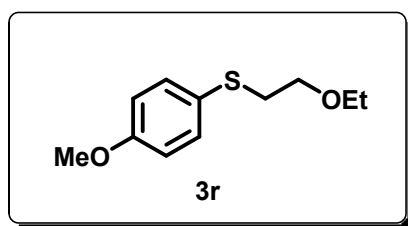

A mixture of  $\text{CuSO}_4 \cdot 5\text{H}_2\text{O}$  (5.0 mg, 10 mol%), **L2** (3.1 mg, 10 mol%), 1-bromo-2-ethoxyethane (153 mg, 1 mmol, 5 equiv.) and  $\text{Na}_2\text{S}_2\text{O}_3 \cdot 5\text{H}_2\text{O}$  (248 mg, 1 mmol, 5 equiv.) in  $\text{H}_2\text{O}$  (1 mL) in a Schlenk tube was heated at 80 °C for 2 h. After cooled to room temperature, **1d** (41.0 mg, 0.2 mmol, 1 equiv.) was added to the solution, stirred for 15 min at room temperature, then  $\text{BF}_3 \cdot \text{Et}_2\text{O}$  (25  $\mu\text{L}$ , 0.2 mmol, 1 equiv.) was added. The mixture was stirred at room temperature for 12 h. After the reaction was complete, EtOAc (5 mL) was added at room temperature, the combined mixture was dried over anhydrous  $\text{MgSO}_4$ , then filtrated through celite, washed with EtOAc (5 mL x 3), the mixture was evaporated under vacuum and purified by flash column chromatography (petroleum ether/ethyl acetate 20:1) to afford the desired product (2-ethoxyethyl)(4-methoxyphenyl)sulfane (**3r**): (28.8 mg, 68%), colorless oil.  $^1\text{H}$  NMR (400 MHz,  $\text{CDCl}_3$ )  $\delta$ : 7.29-7.31 (m, 2 H), 6.75-6.78 (m, 2 H), 3.72 (s, 3 H), 3.48 (t,  $J = 8.0$  Hz, 2 H), 3.41 (q,  $J = 8.0$  Hz, 2 H), 2.92 (t,  $J = 8.0$  Hz, 2 H), 1.12 (t,  $J = 8.0$  Hz, 3 H);  $^{13}\text{C}$  NMR (100 MHz,  $\text{CDCl}_3$ )  $\delta$ : 159.0, 133.4, 126.0, 114.6, 69.3, 66.3, 55.3, 35.2, 15.1; IR (neat):  $\nu = 2856, 1592, 1492, 1284, 1243, 1173, 1102, 1030, 825$ ; MS  $m/z$ : 212.



## V. Gram scale Experiments

### a) Gram scale for synthesis of benzyl(phenyl)sulfane

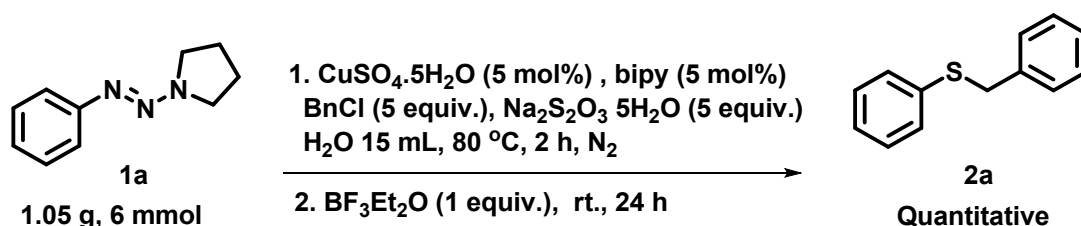

A mixture of  $\text{CuSO}_4 \cdot 5\text{H}_2\text{O}$  (74 mg, 5 mol%), bipy (47 mg, 5 mol%), BnCl (30 mmol, 5 equiv.) and  $\text{Na}_2\text{S}_2\text{O}_3 \cdot 5\text{H}_2\text{O}$  (7.44 g, 30 mmol, 5 equiv.) in  $\text{H}_2\text{O}$  (15 mL) was heated at 80 °C for 2 h under an atmosphere of  $\text{N}_2$ . After cooled to room temperature, **1a** (1.05 g, 6 mmol, 1 equiv.) was added to the solution, stirred for 15 min at room temperature, then  $\text{BF}_3 \cdot \text{Et}_2\text{O}$  (6 mmol, 1 equiv.) was added. The mixture was stirred at room temperature 24 h. After the reaction was complete, EtOAc (20 mL) was added, extracted the product with EtOAc (50 mL x 3). The combined organic extracts were washed with brine and dried over  $\text{Na}_2\text{SO}_4$ . After removal of the solvents under reduced pressure, the residue was purified by flash column chromatography (petroleum ether/ethyl acetate 20:1) afforded substrate **2a** as a colorless oil (quantitative yield).

### b) Gram scale for synthesis of 4-(benzylthio)-N-(5-methylisoxazol-3-yl)benzenesulfonamide

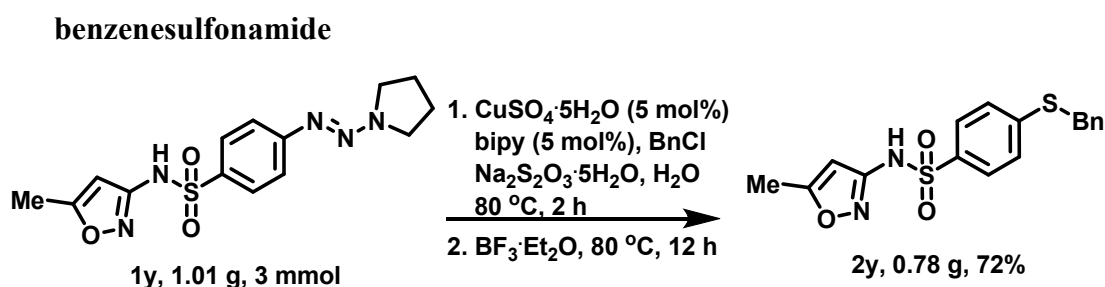

A mixture of  $\text{CuSO}_4 \cdot 5\text{H}_2\text{O}$  (37 mg, 5 mol%), bipy (23 mg, 5 mol%), BnCl (15 mmol, 5 equiv.) and  $\text{Na}_2\text{S}_2\text{O}_3 \cdot 5\text{H}_2\text{O}$  (3.70 g, 15 mmol, 5 equiv.) in  $\text{H}_2\text{O}$  (6 mL) was heated at 80 °C for 2 h. After cooled to room temperature, **1y** (1.01 g, 3 mmol, 1 equiv.) was added to the solution, stirred for 15 min at room temperature, then  $\text{BF}_3 \cdot \text{Et}_2\text{O}$  (3 mmol,

1 equiv.) was added. The mixture was stirred at room temperature, and stirred at 80 °C for 12 h. After the reaction was complete, EtOAc (20 mL) was added, extracted the product with EtOAc (30 mL x 3). The combined organic extracts were washed with brine and dried over Na<sub>2</sub>SO<sub>4</sub>. After removal of the solvents under reduced pressure, the residue was purified by flash column chromatography (petroleum ether/ethyl acetate 1:1-1:2) afforded substrate **2y** as a white solid (0.78 g, 72%).

## VI. Sulfuration in neutral aqueous conditions and in the presence of biomolecules

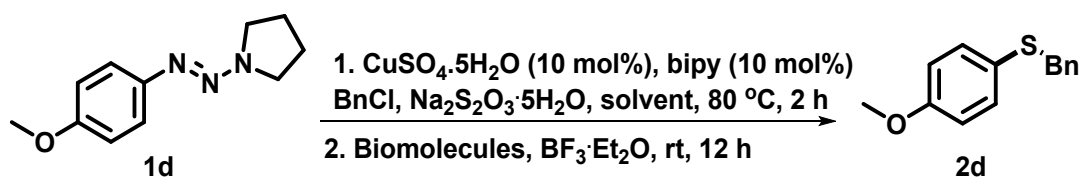

A mixture of  $\text{CuSO}_4 \cdot 5\text{H}_2\text{O}$  (5.0 mg, 10 mol%), bipy (3.1 mg, 10 mol%),  $\text{BnCl}$  (0.126 g, 1 mmol, 5 equiv.) and  $\text{Na}_2\text{S}_2\text{O}_3 \cdot 5\text{H}_2\text{O}$  (248 mg, 1 mmol, 5 equiv.) in  $\text{H}_2\text{O}$  (1 mL) or pH 7.4 10X PBS (1 mL) was heated at 80 °C for 2 h. After cooled to room temperature, **1d** (0.2 mmol, 1 equiv.) and biomolecules (0.2 mmol, 1 equiv.) were added to the mixture, stirred for 15 min at room temperature, then  $\text{BF}_3 \cdot \text{Et}_2\text{O}$  (0.2 mmol, 1 equiv.) was added. The mixture was stirred at room temperature. When the reaction was complete,  $\text{EtOAc}$  (5 mL) was added, the combined mixture was dried over anhydrous  $\text{MgSO}_4$ , then filtrated through celite, washed with  $\text{EtOAc}$  (5 mL x 3), the mixture was evaporated under vacuum and purified by flash column chromatography (petroleum ether/ethyl acetate 100:1) to afford the desired product **2d**.

## VII. Mechanism Study

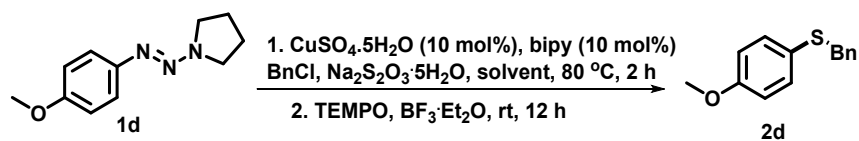

A mixture of  $\text{CuSO}_4 \cdot 5\text{H}_2\text{O}$  (5.0 mg, 10 mol%), bipy (3.1 mg, 10 mol%),  $\text{BnCl}$  (0.126 g, 1 mmol, 5 equiv.) and  $\text{Na}_2\text{S}_2\text{O}_3 \cdot 5\text{H}_2\text{O}$  (248 mg, 1 mmol, 5 equiv.) in  $\text{H}_2\text{O}$  (1 mL) was heated at  $80\text{ }^\circ\text{C}$  for 2 h. After cooled to room temperature, **1d** (0.2 mmol, 1 equiv.) and TEMPO (0.2 mmol, 2 equiv.) were added to the mixture, stirred for 15 min at room temperature, then  $\text{BF}_3 \cdot \text{Et}_2\text{O}$  (0.2 mmol, 1 equiv.) was added. The mixture was stirred at room temperature. When the reaction was complete,  $\text{EtOAc}$  (5 mL) was added, the combined mixture was dried over anhydrous  $\text{MgSO}_4$ , then filtrated through celite, washed with  $\text{EtOAc}$  (5 mL x 3), the mixture was evaporated under vacuum and purified by flash column chromatography (petroleum ether/ethyl acetate 100:1) to afford the desired product benzyl(4-methoxyphenyl)sulfane **2d** in 16% yield.

### VIII. Copies of the $^1\text{H}$ NMR, $^{13}\text{C}$ NMR, $^{19}\text{F}$ NMR.

#### 2a $^1\text{H}$ NMR

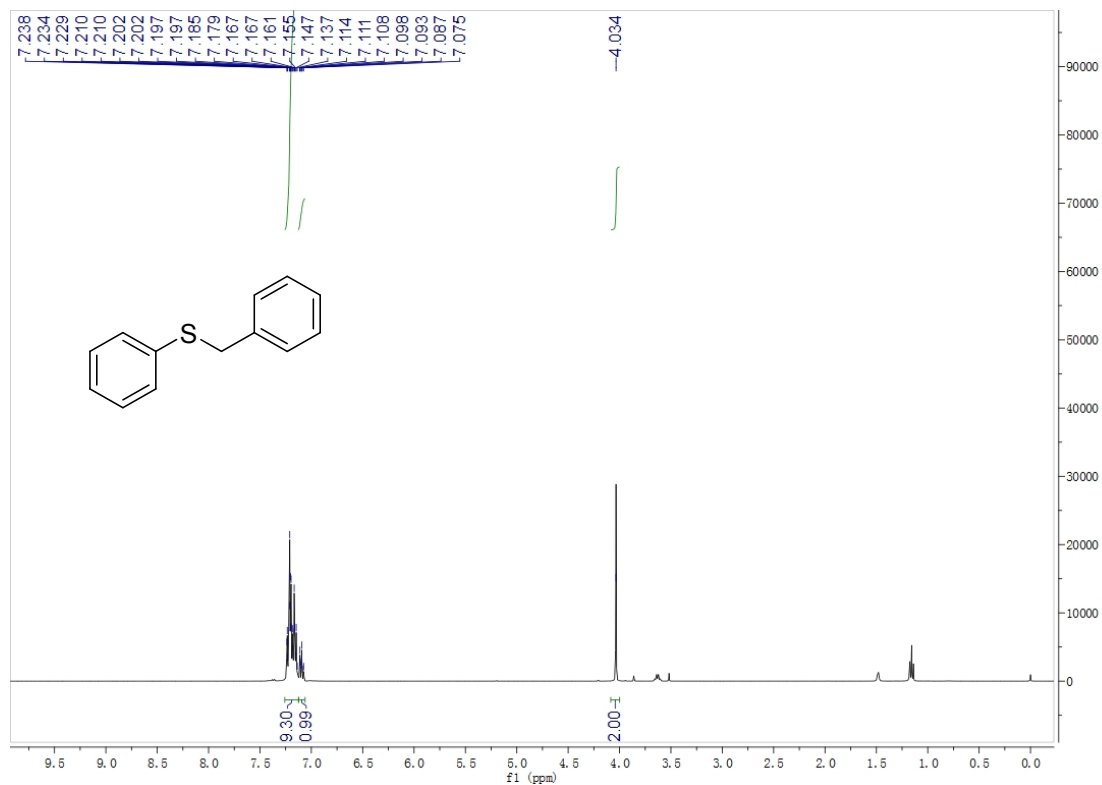

#### 2a $^{13}\text{C}$ NMR

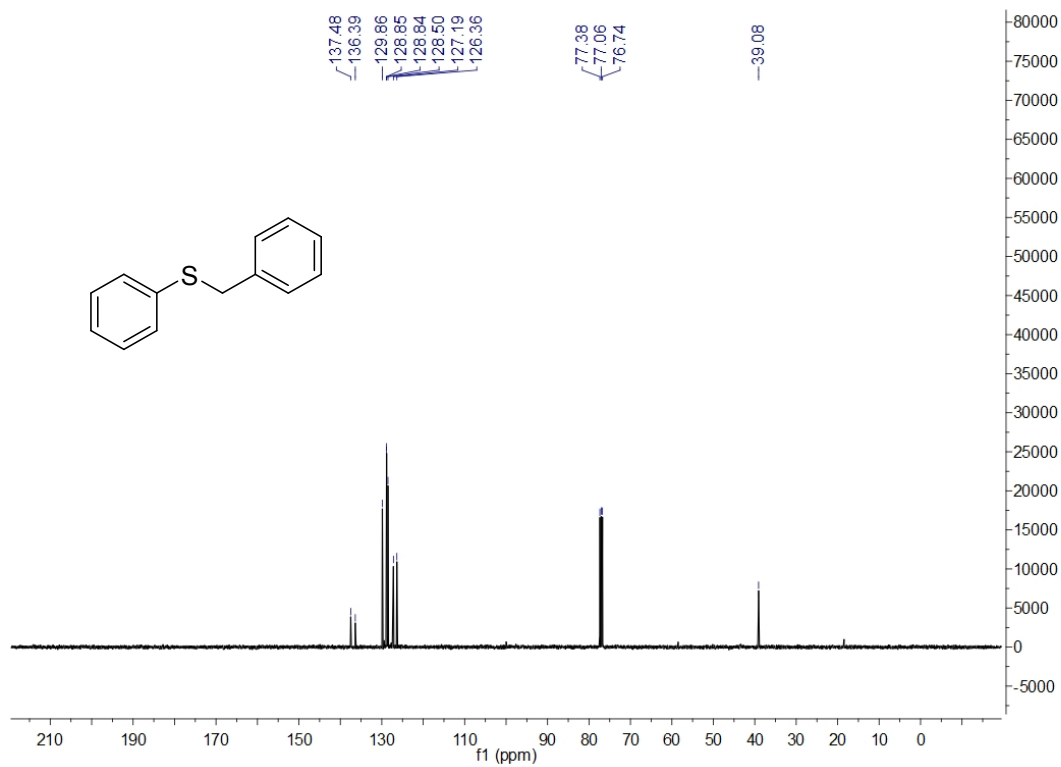

## 2b <sup>1</sup>H NMR

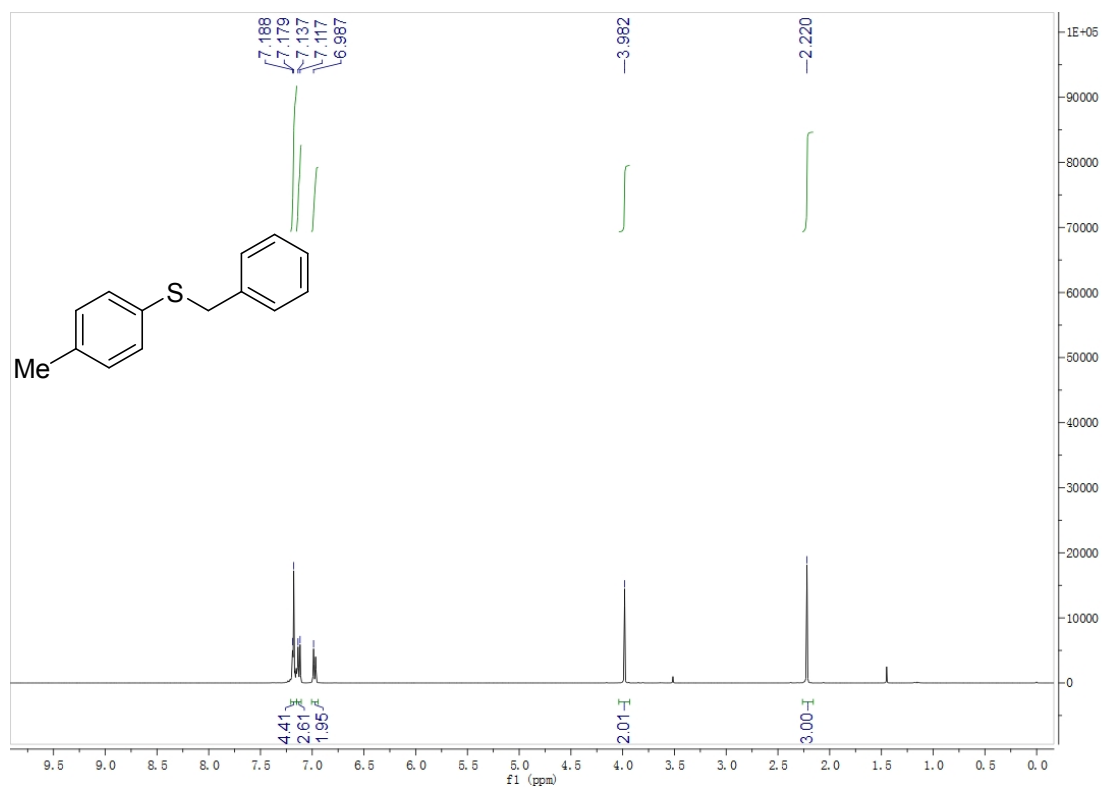

## 2b <sup>13</sup>C NMR

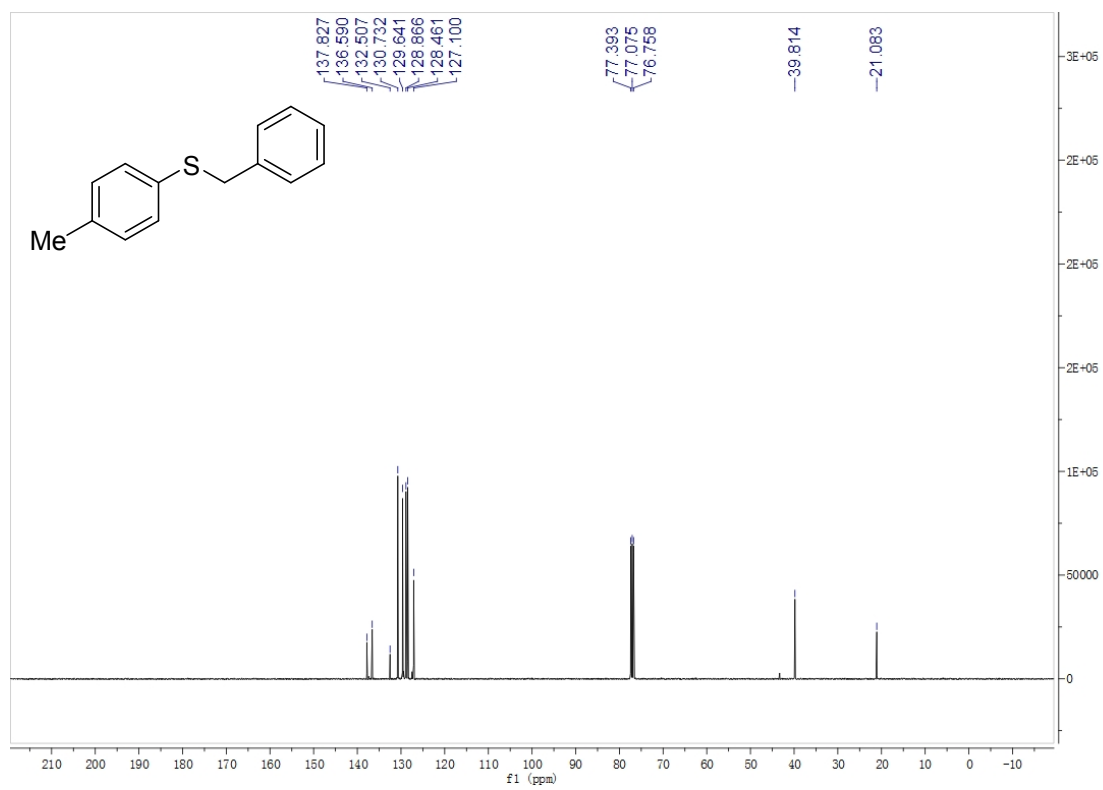

### 2c <sup>1</sup>H NMR

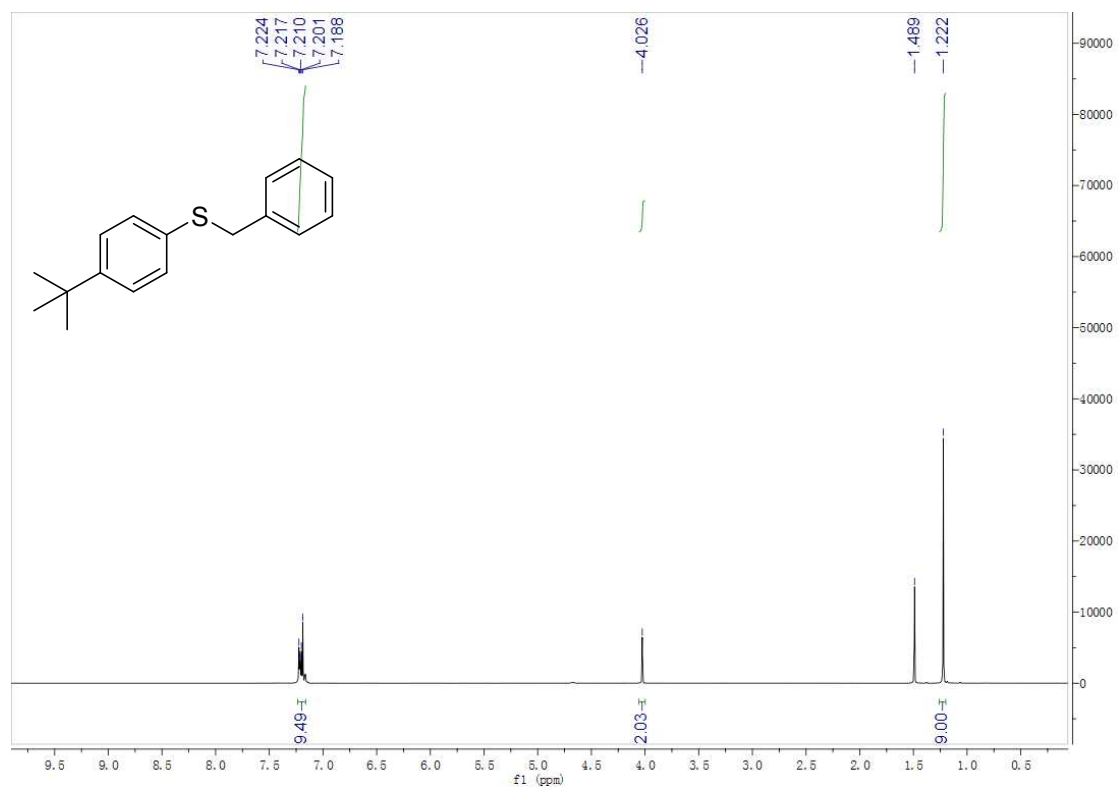

### 2c <sup>13</sup>C NMR

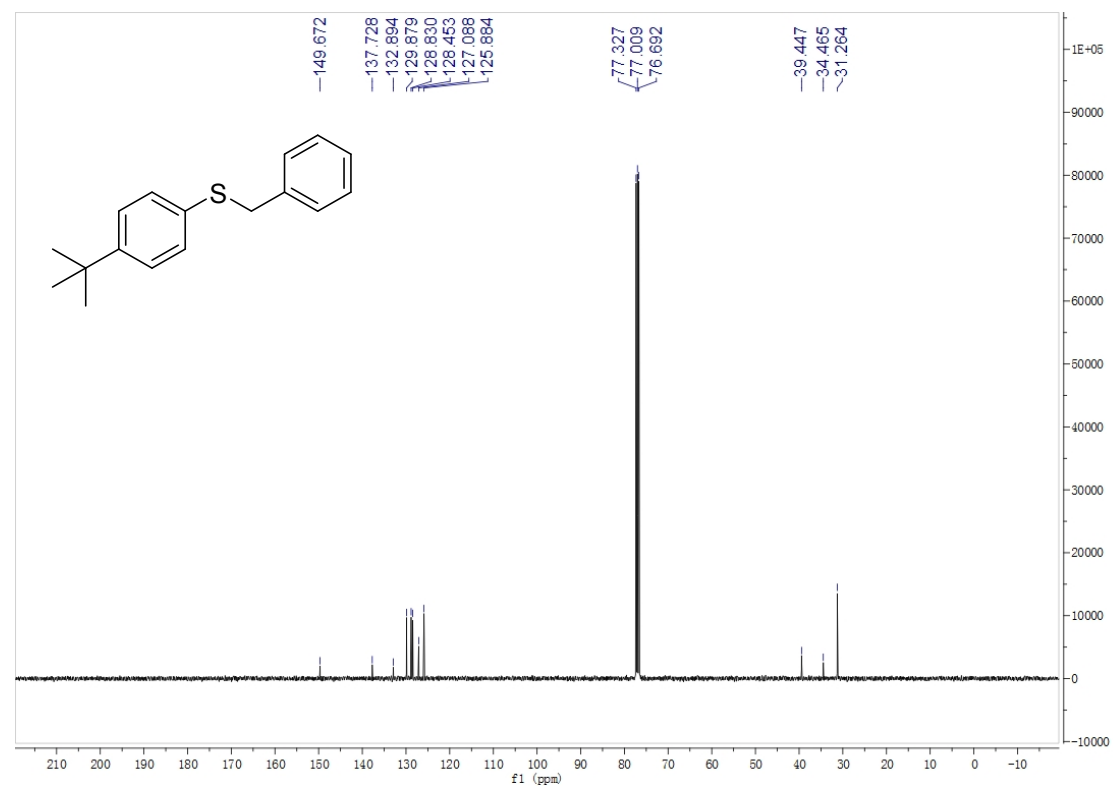

## 2d <sup>1</sup>H NMR

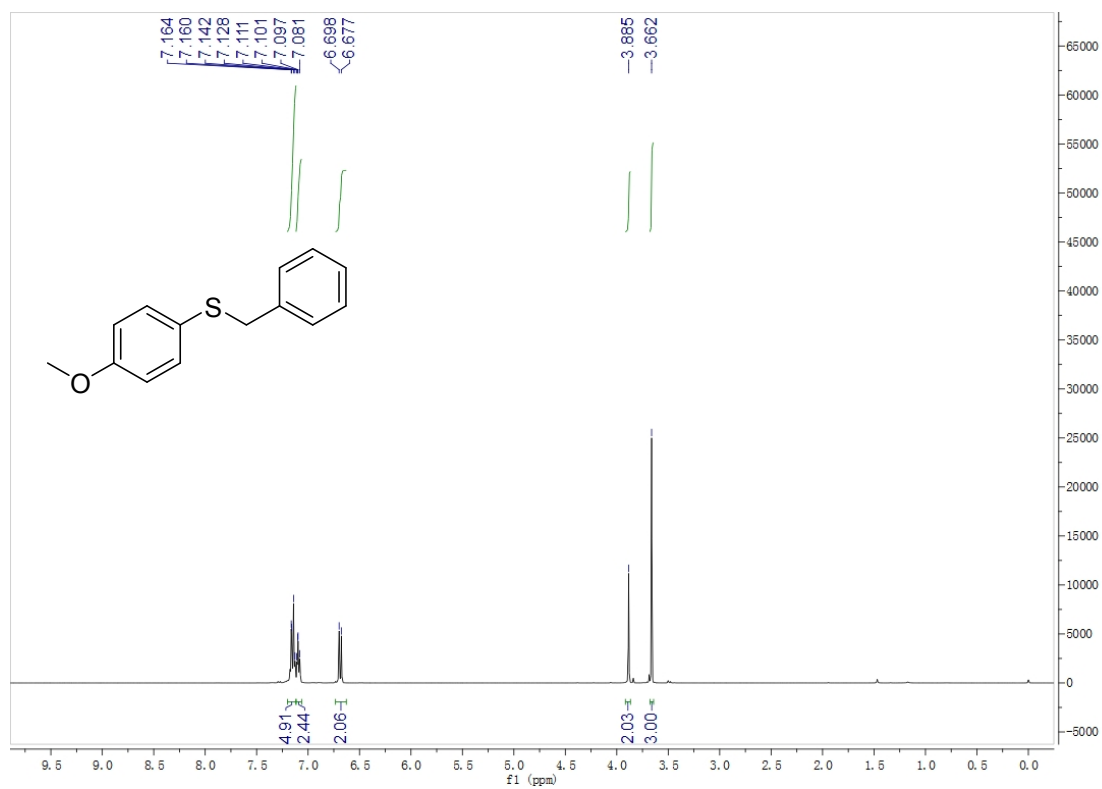

## 2d <sup>13</sup>C NMR

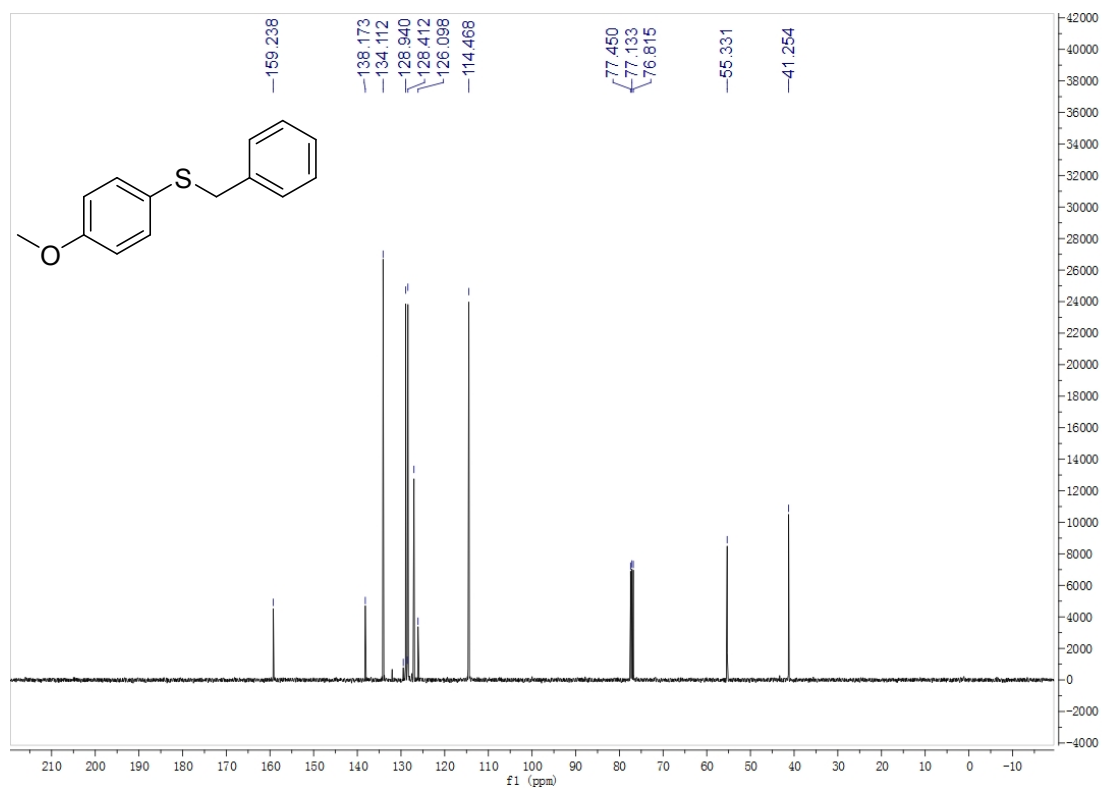



### 2e <sup>1</sup>H NMR

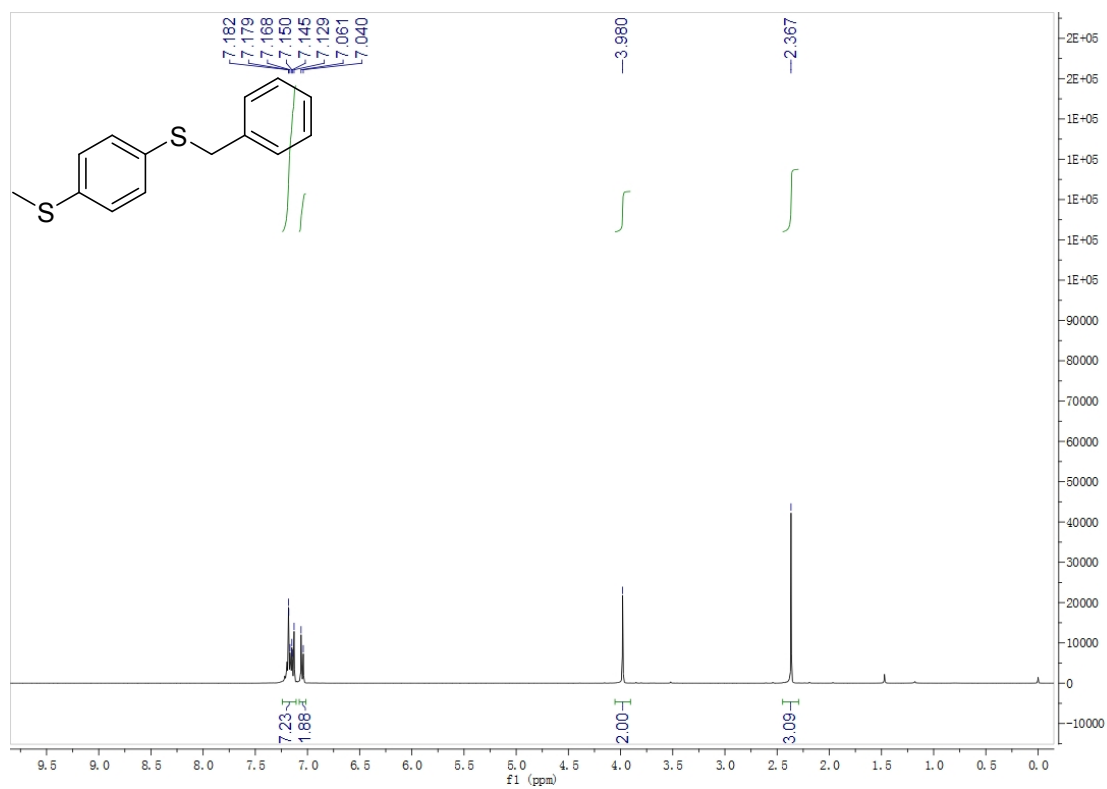

### 2e <sup>13</sup>C NMR

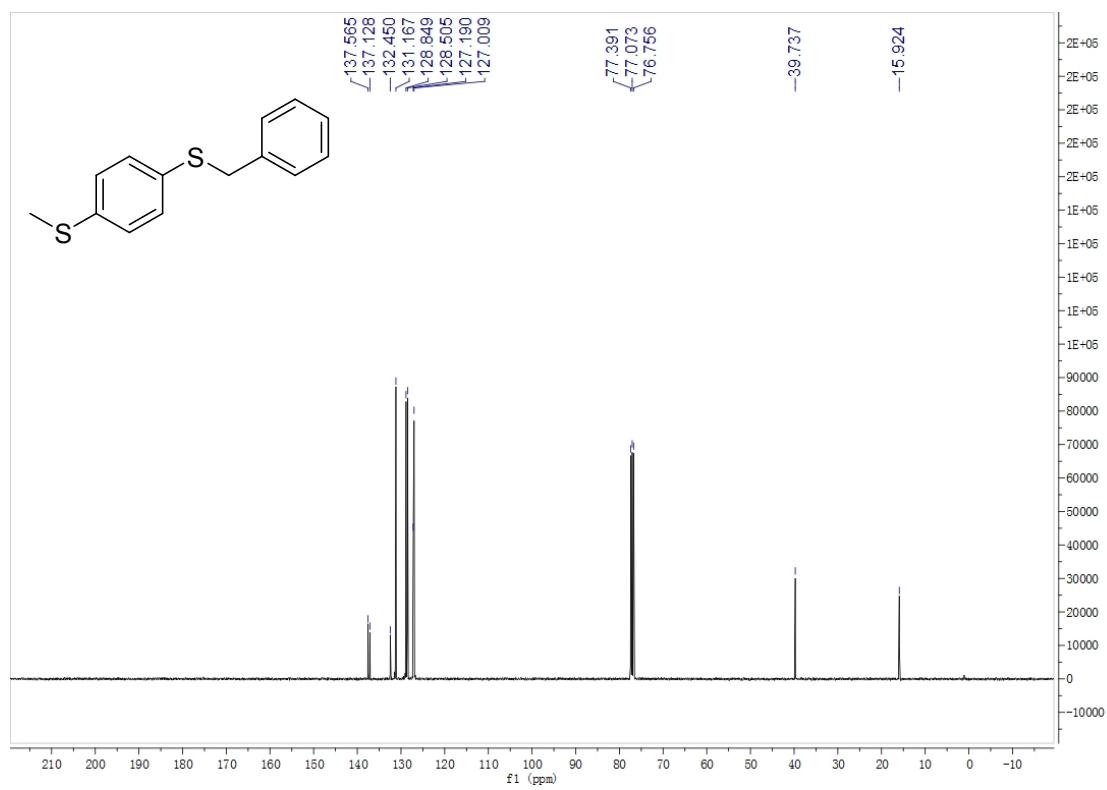

## 2f <sup>1</sup>H NMR

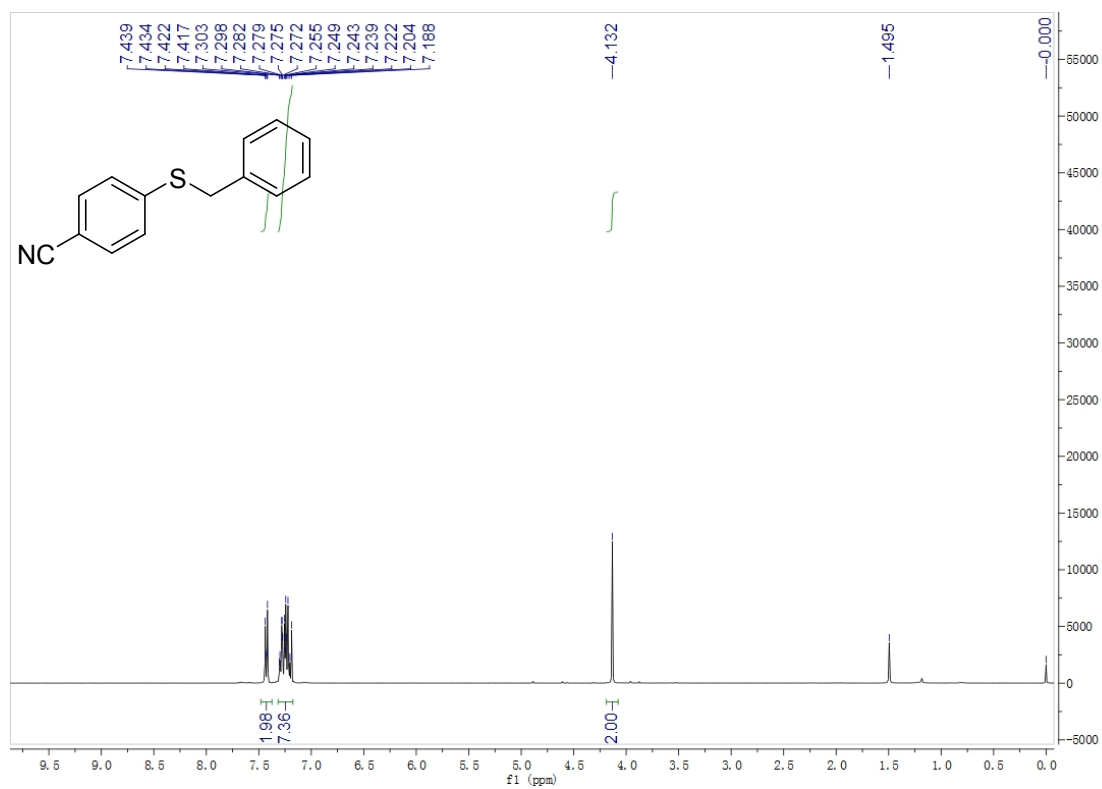

## 2f <sup>13</sup>C NMR

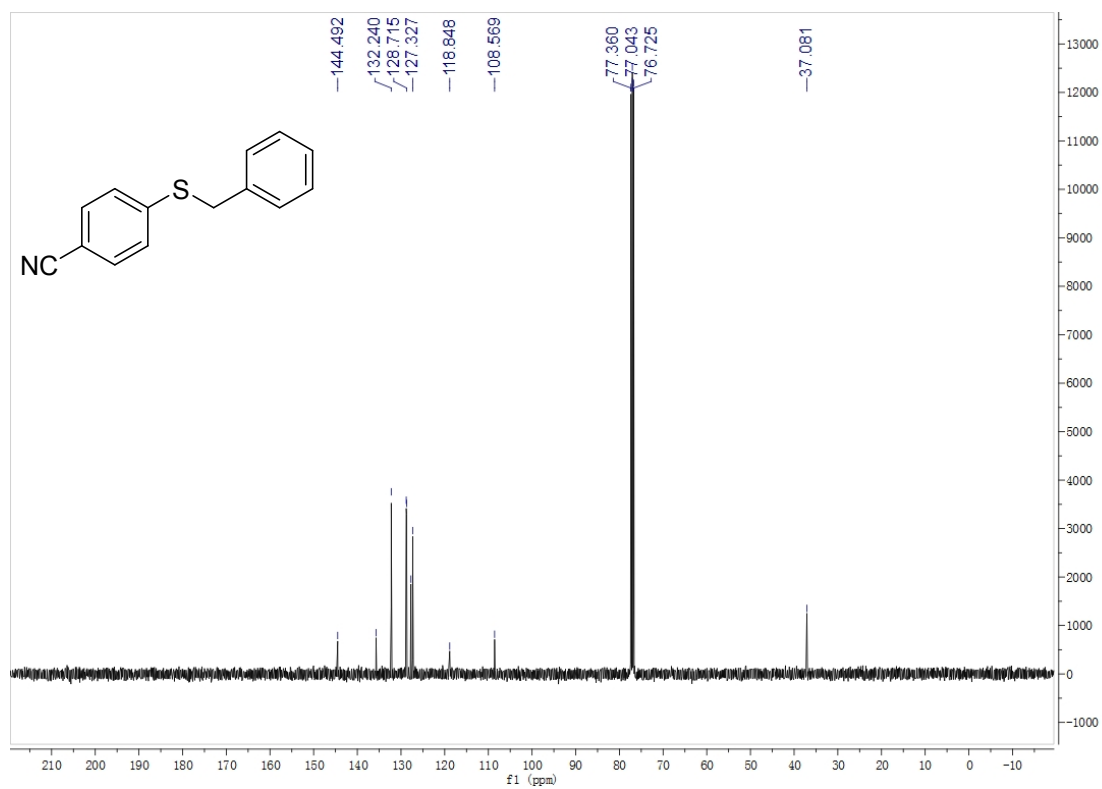

### 2g <sup>1</sup>H NMR

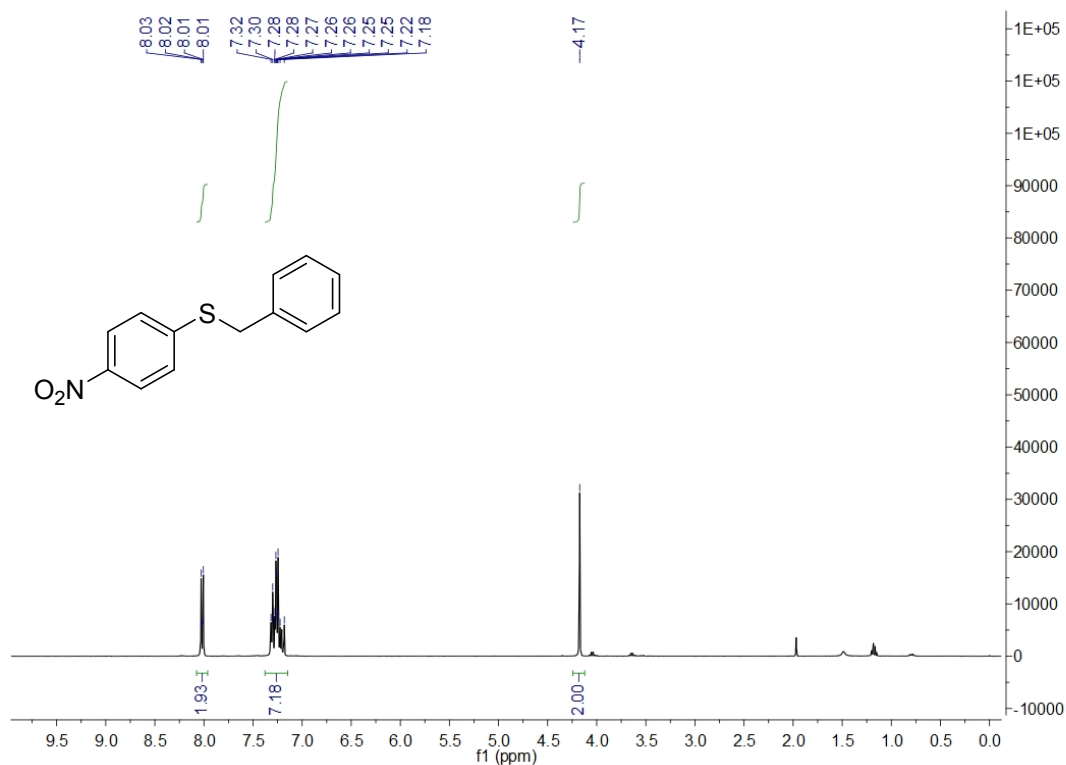

### 2g <sup>13</sup>C NMR

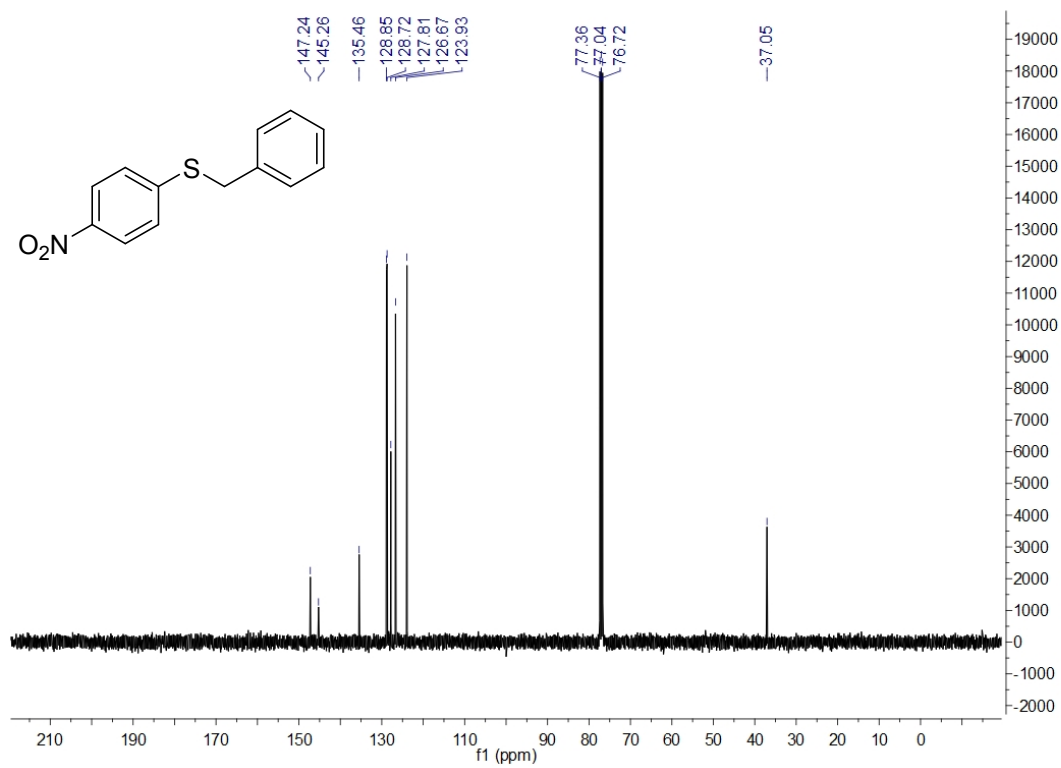

## 2h <sup>1</sup>H NMR

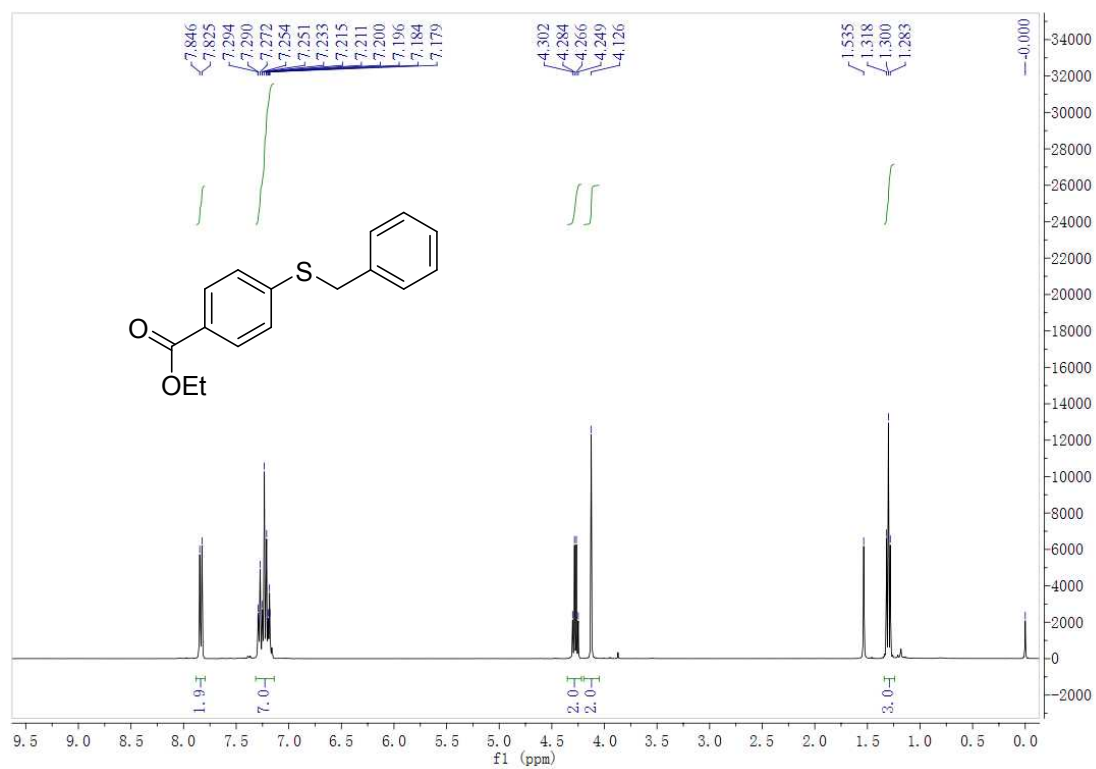

## 2h <sup>13</sup>C NMR

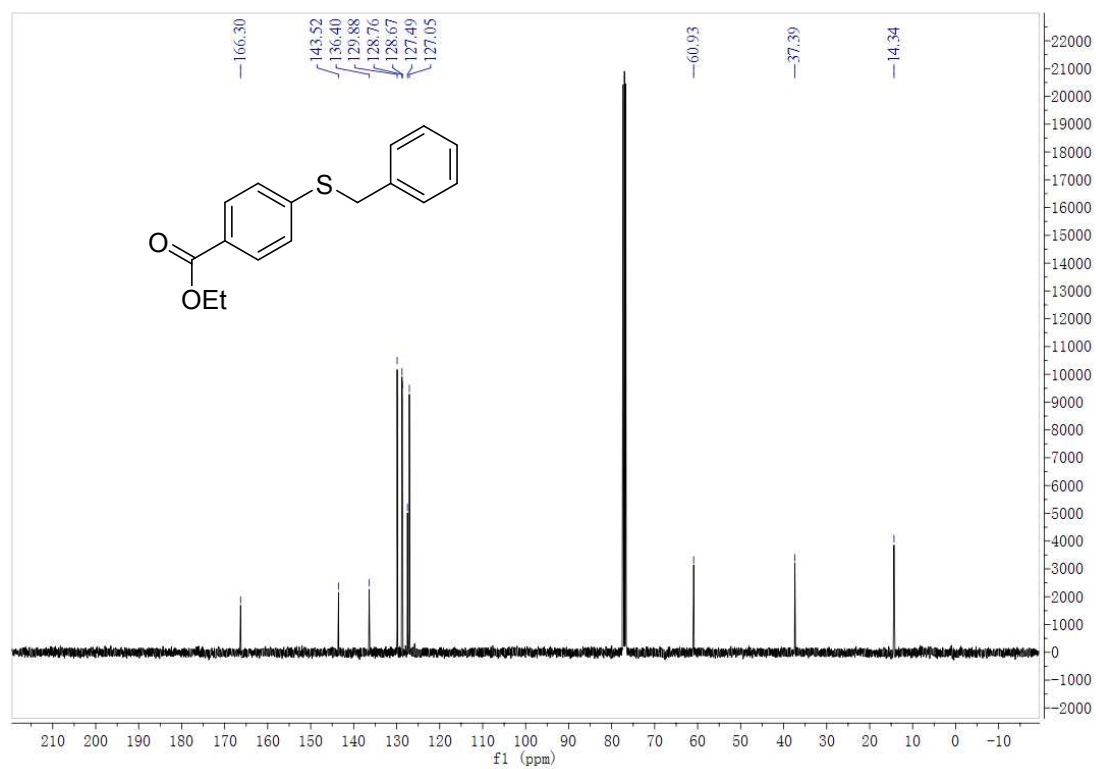

## 2i <sup>1</sup>H NMR

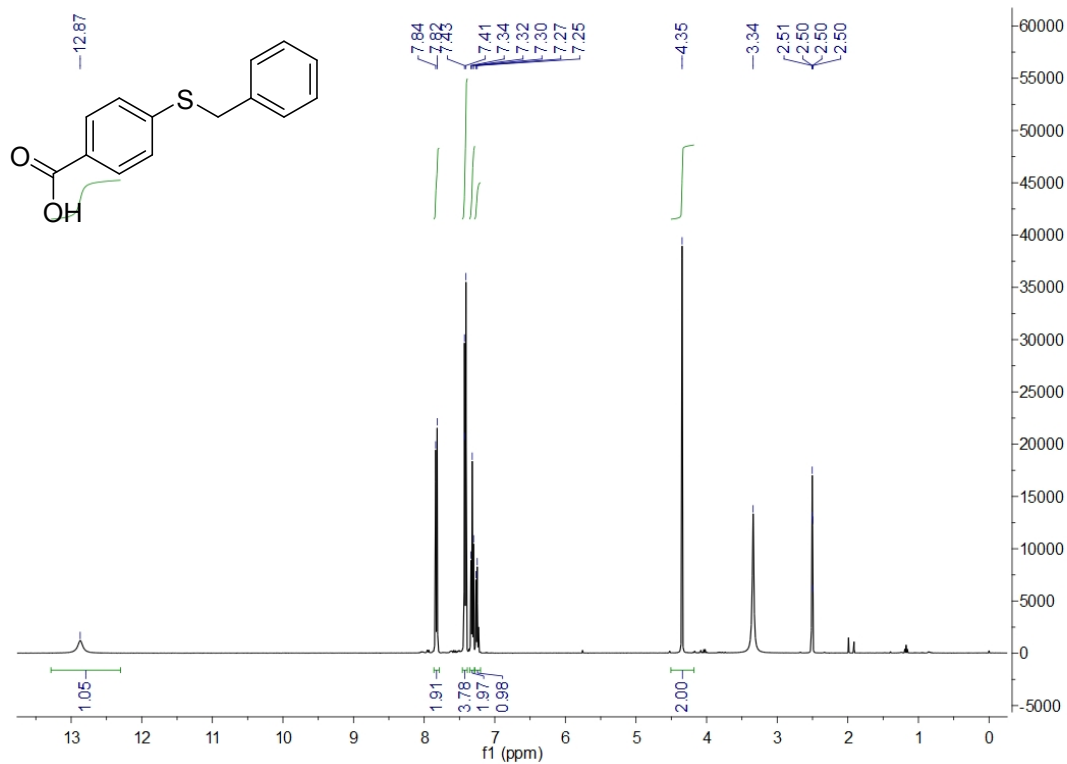

## 2i <sup>13</sup>C NMR

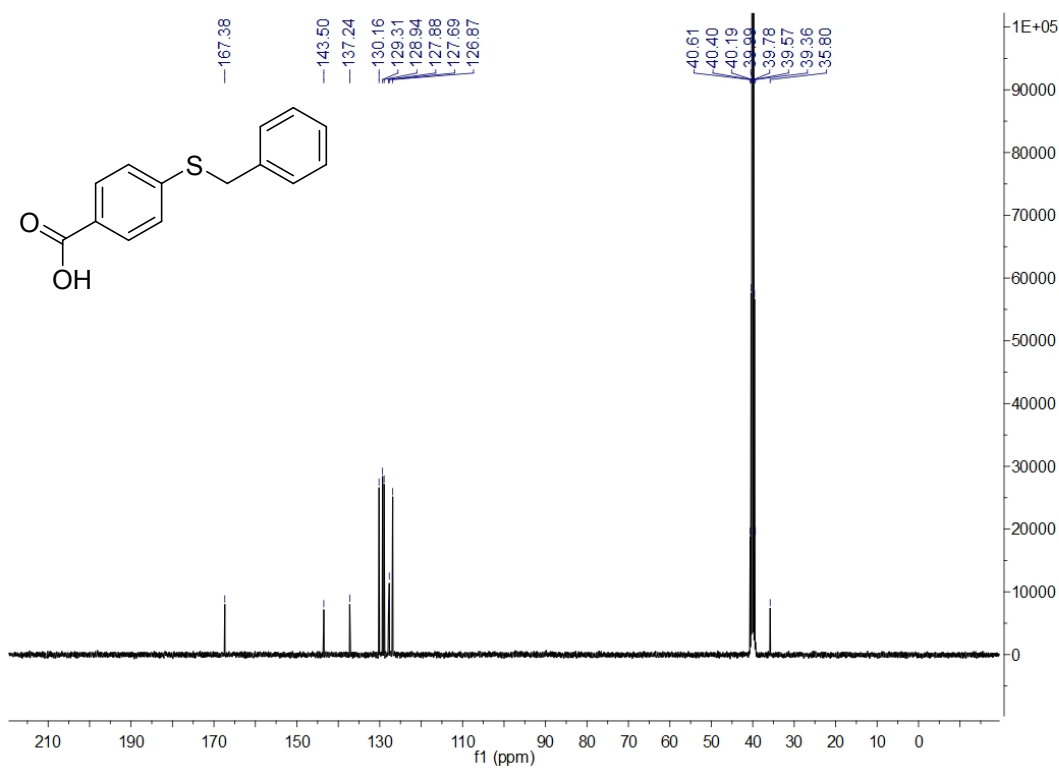

## 2j <sup>1</sup>H NMR

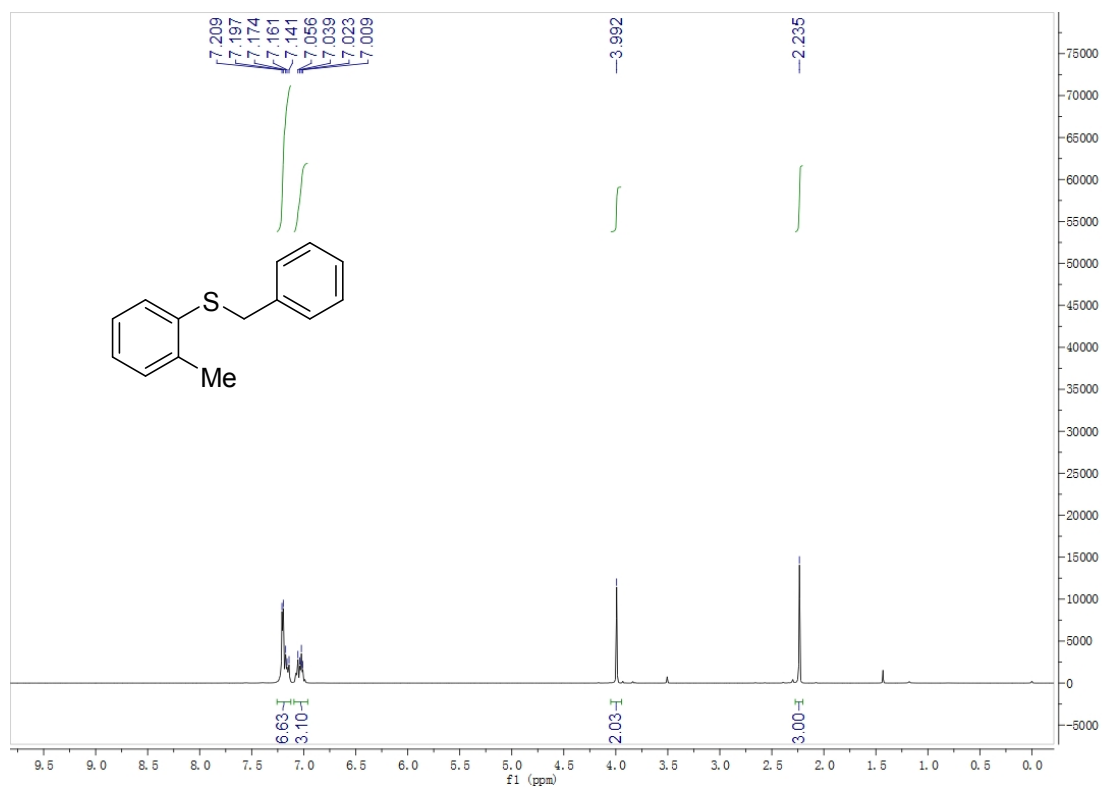

## 2j <sup>13</sup>C NMR

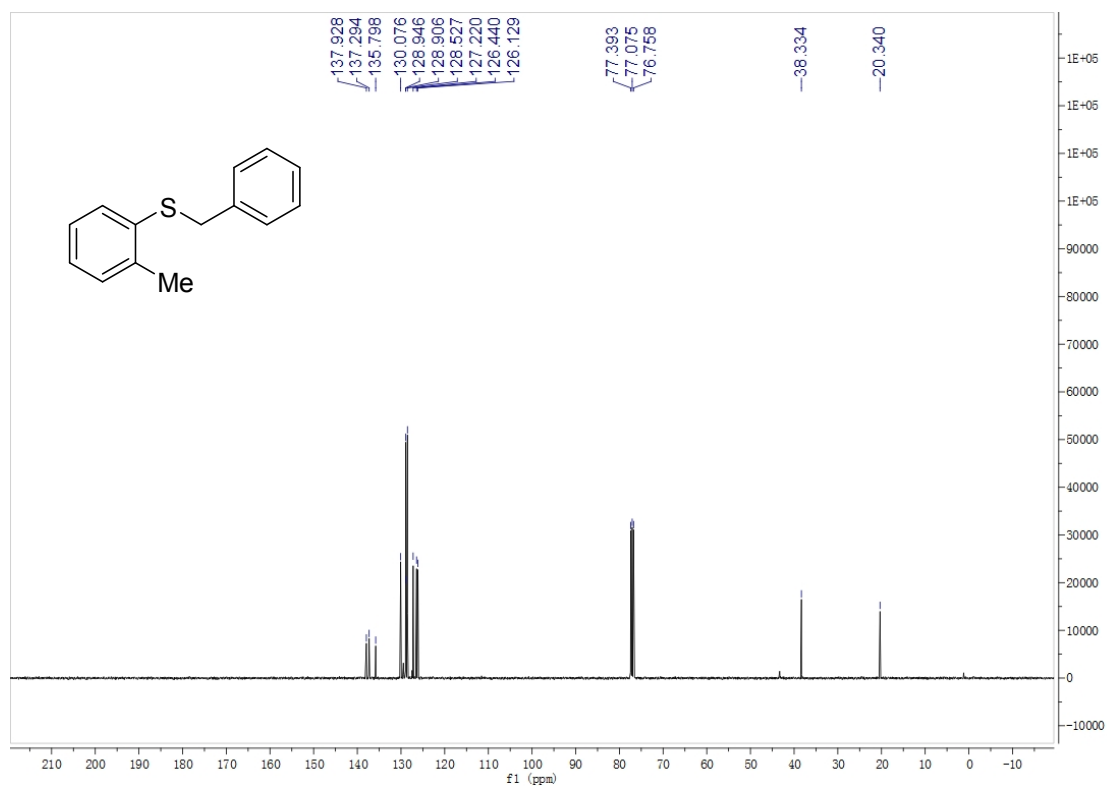

### 2k <sup>1</sup>H NMR

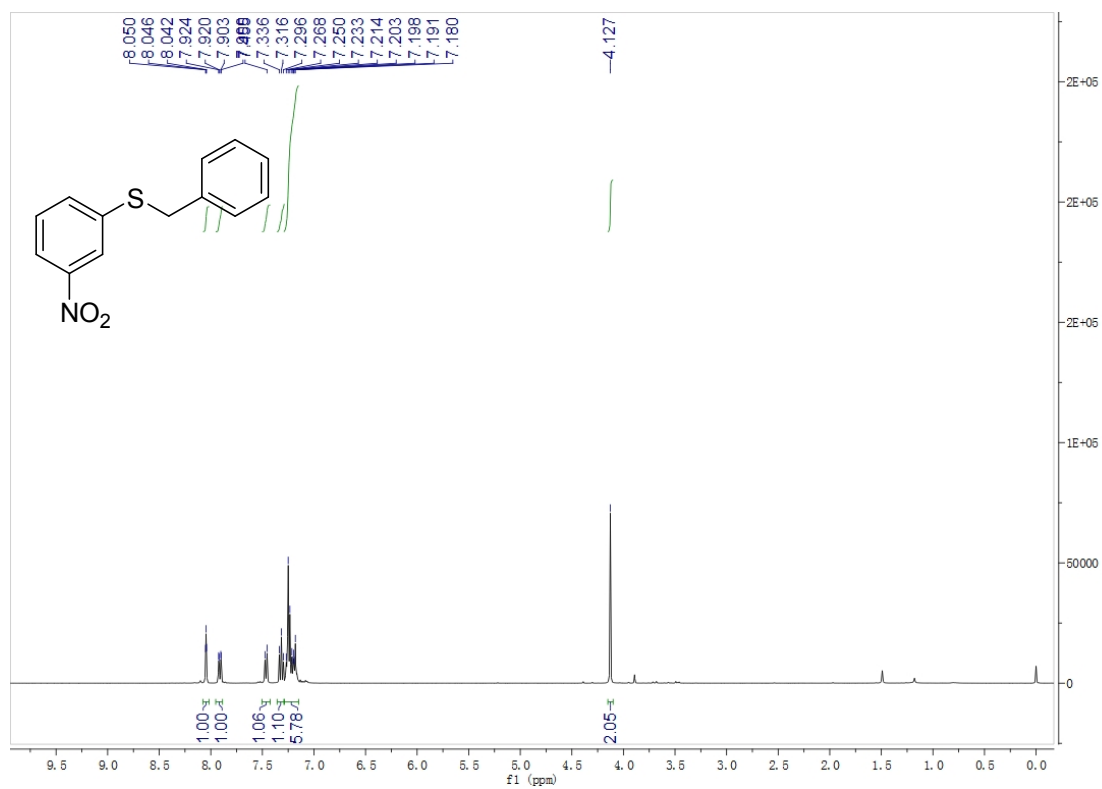

### 2k <sup>13</sup>C NMR

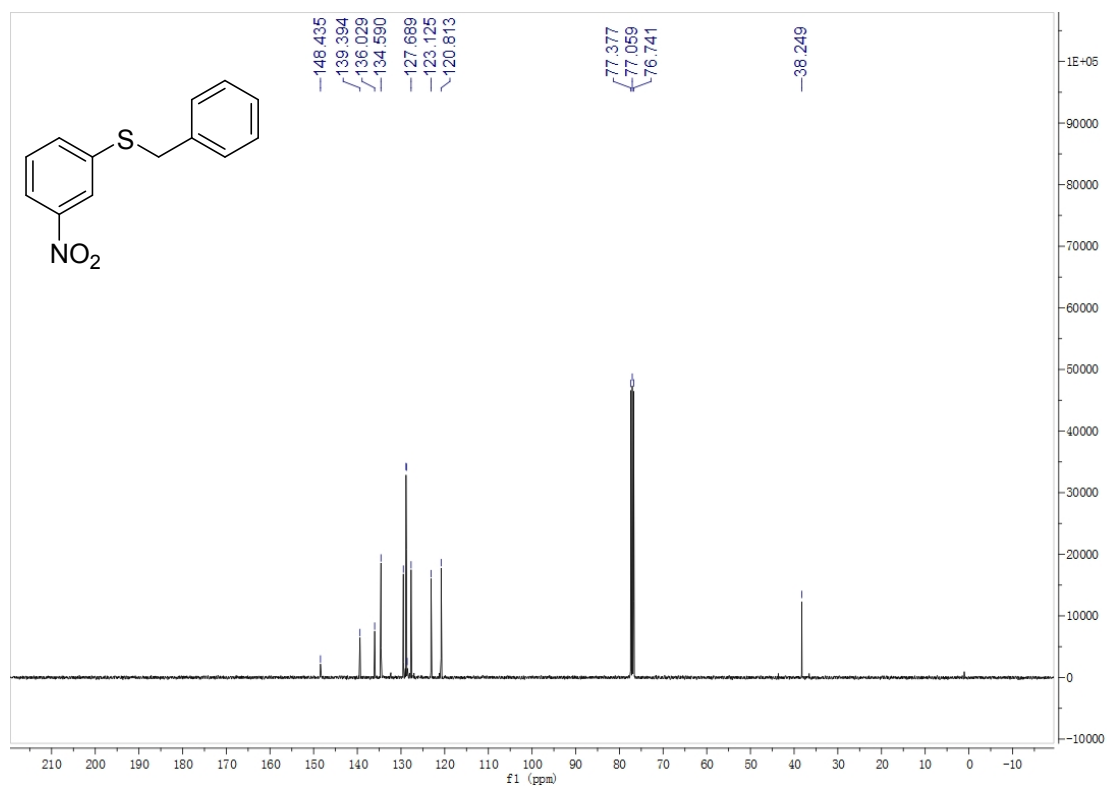

## 21 <sup>1</sup>H NMR

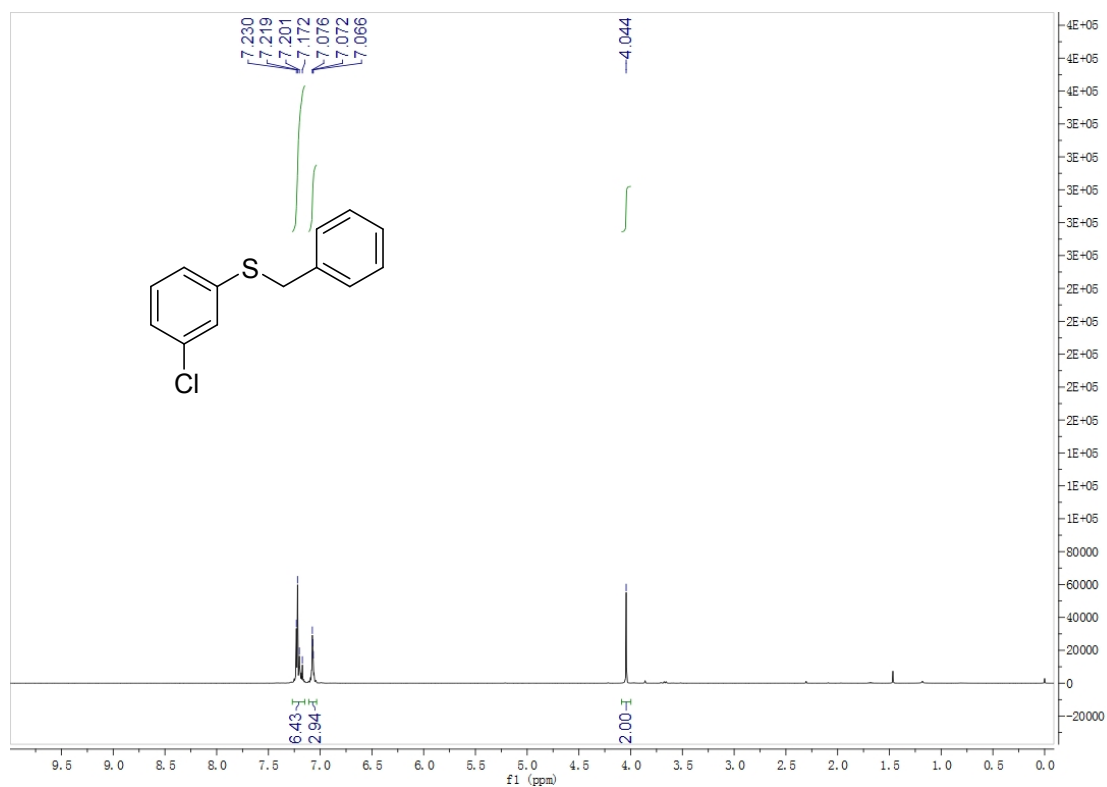

## 21 <sup>13</sup>C NMR

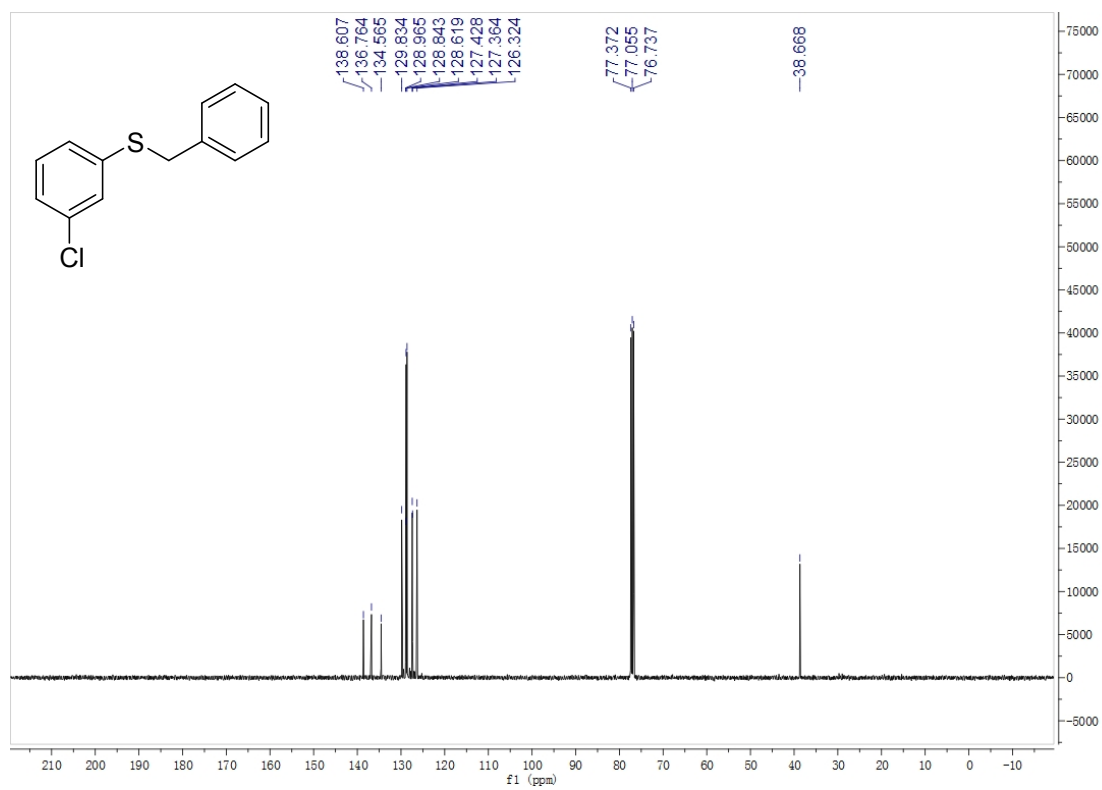



### 2m <sup>1</sup>H NMR

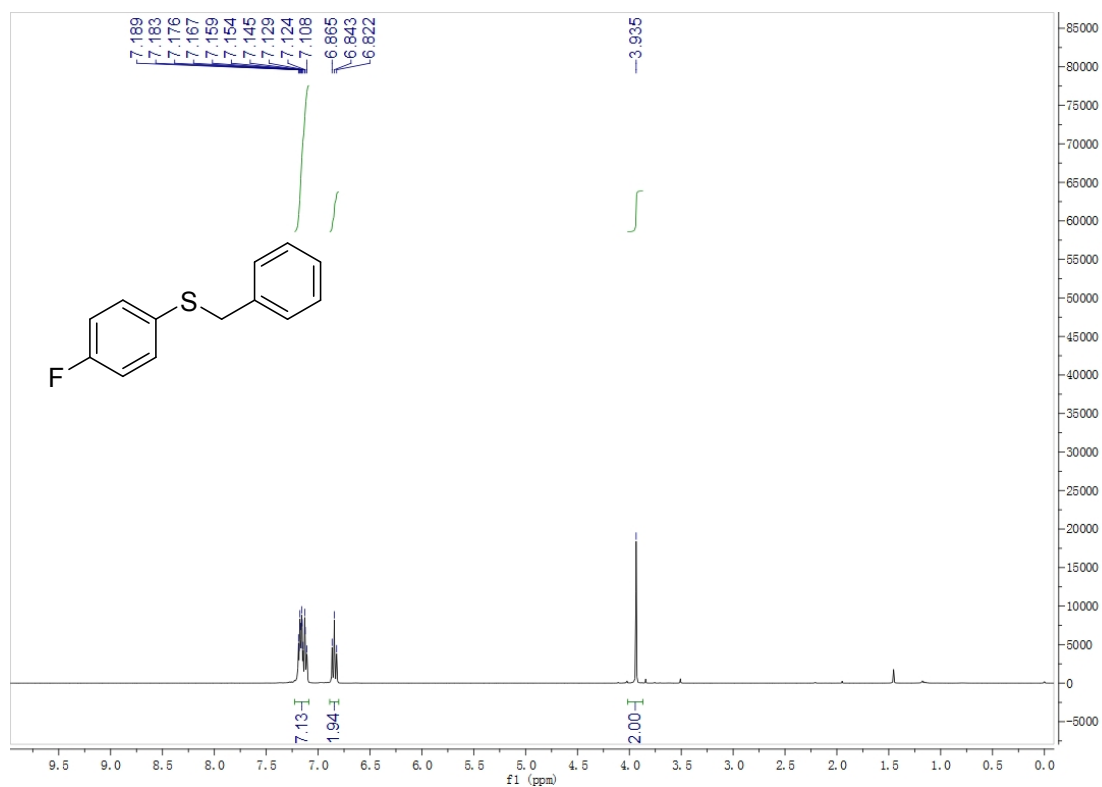

### 2m <sup>13</sup>C NMR

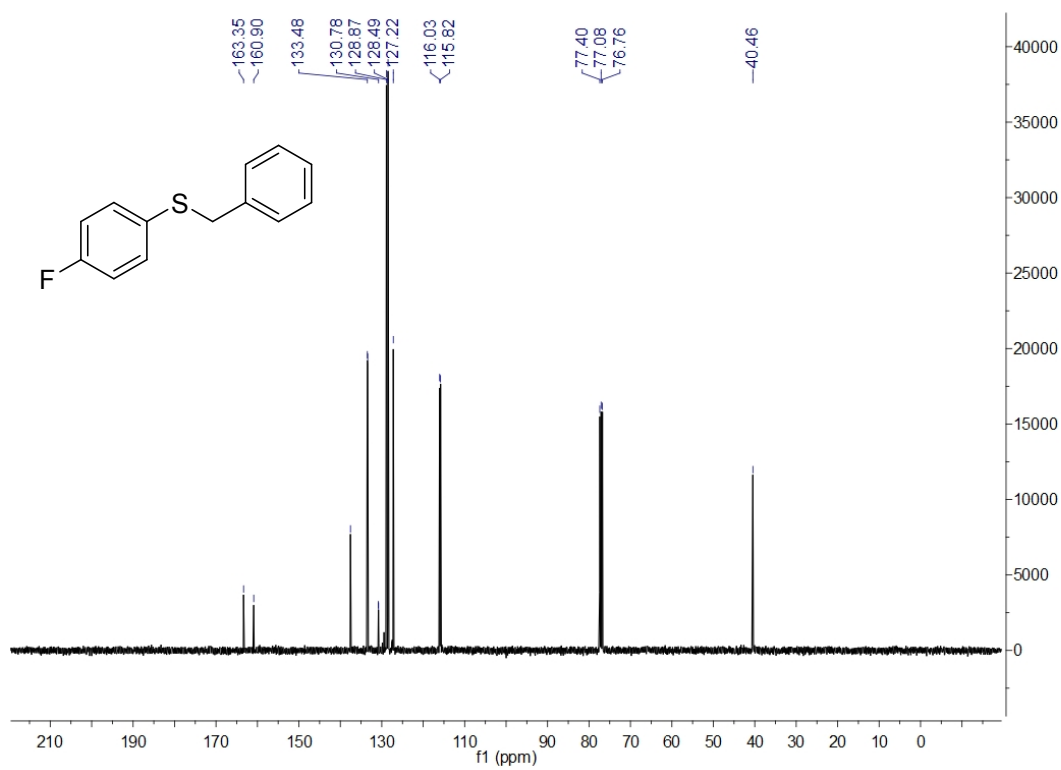

### 2m <sup>19</sup>F NMR

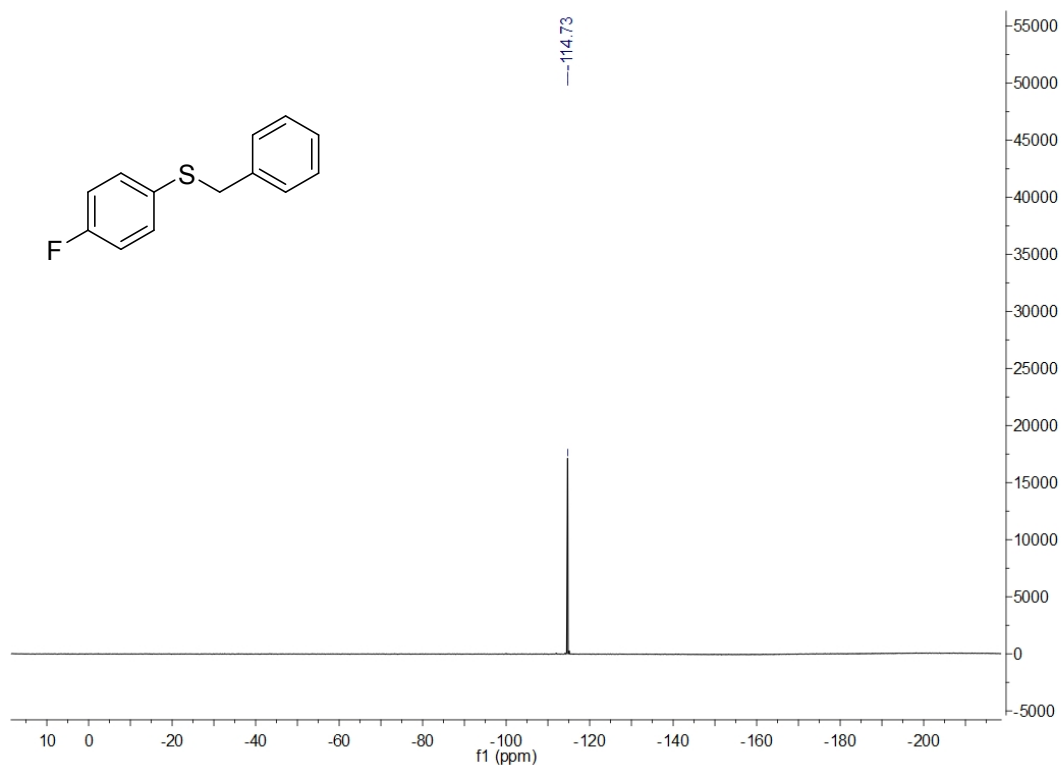

### 2n <sup>1</sup>H NMR

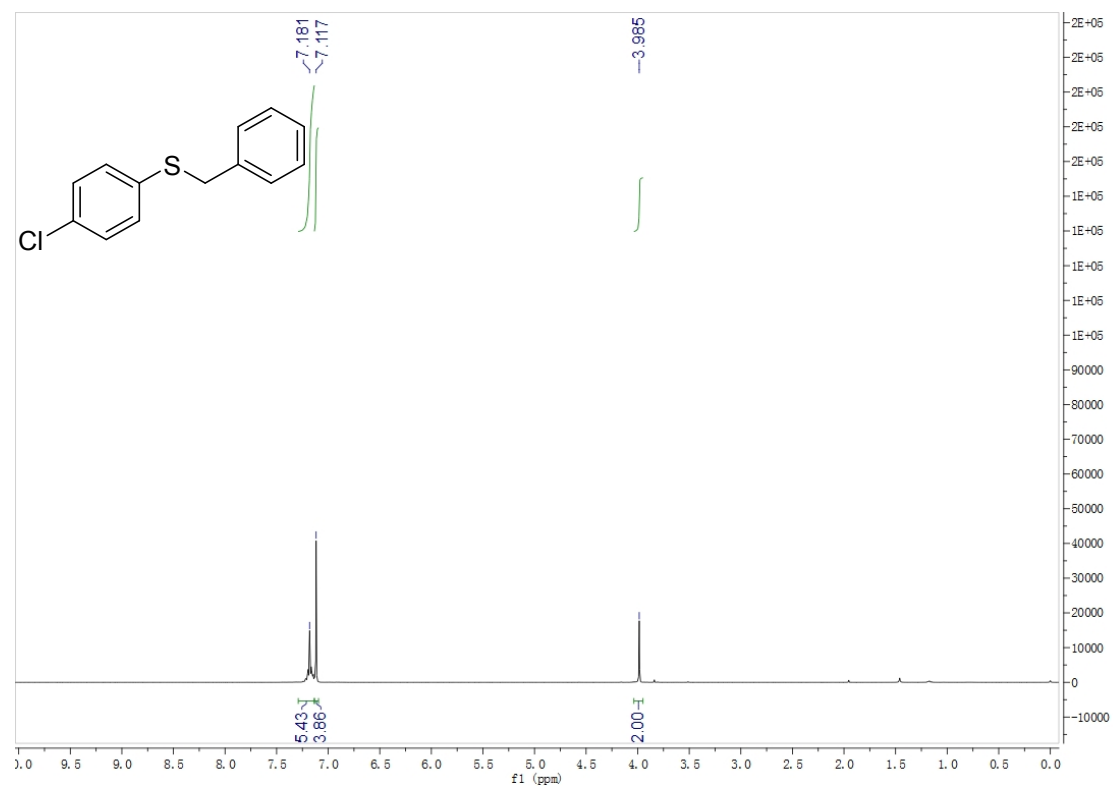

**2n**  $^{13}\text{C}$  NMR

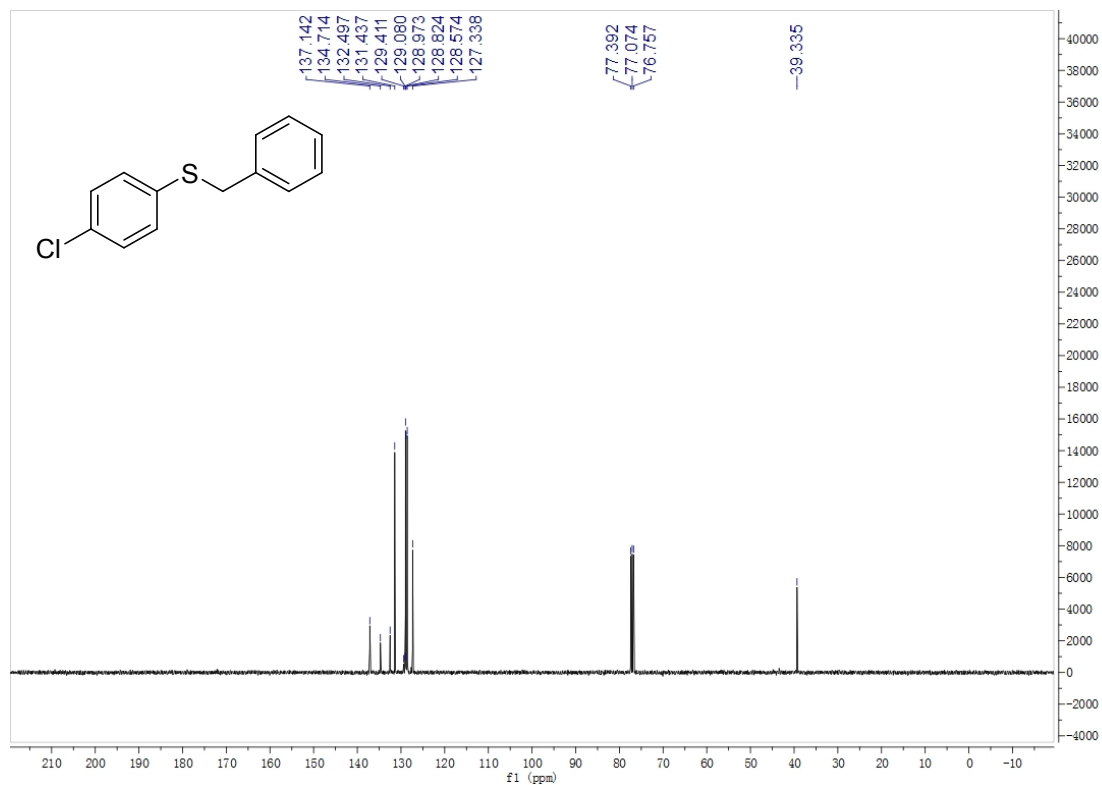

**2o**  $^1\text{H}$  NMR

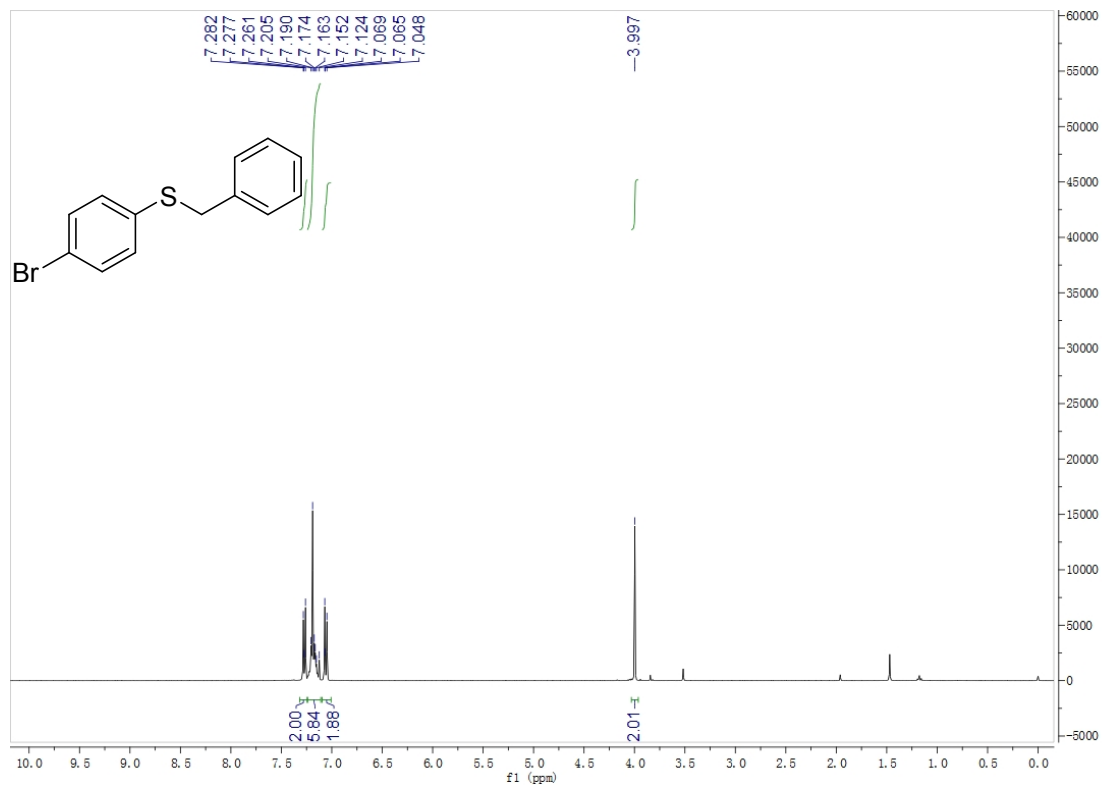

## 2o <sup>13</sup>C NMR

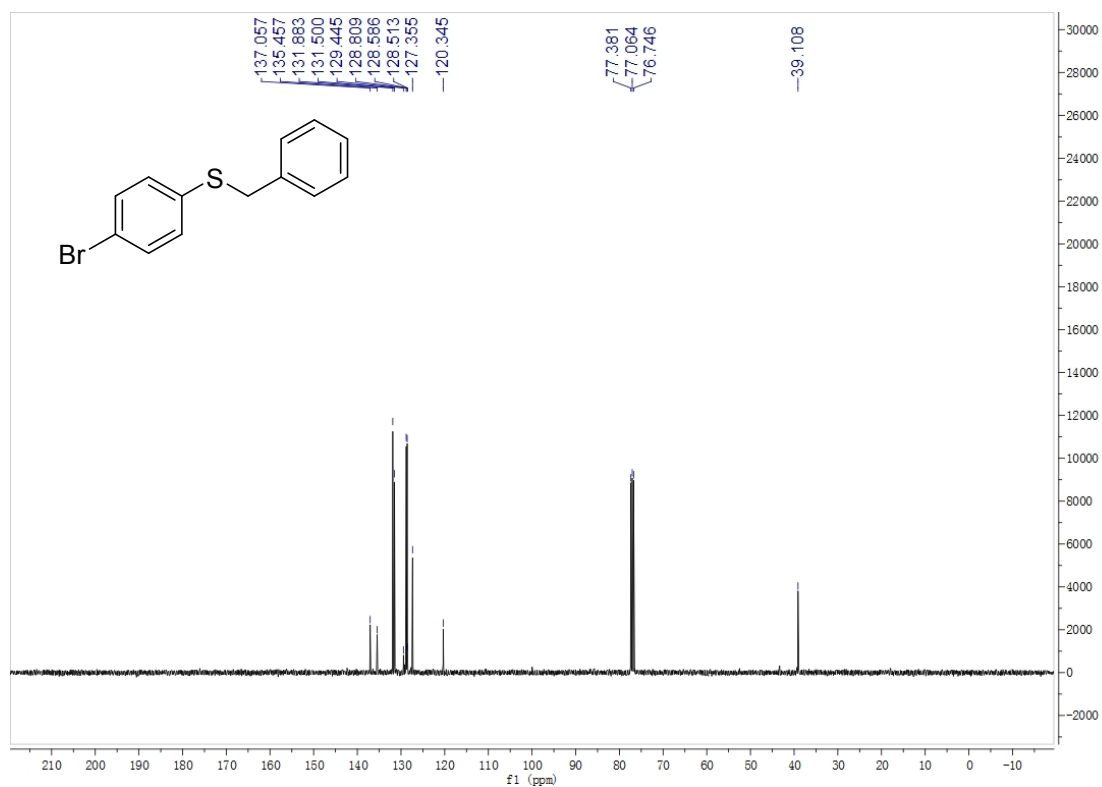

## 2p <sup>1</sup>H NMR

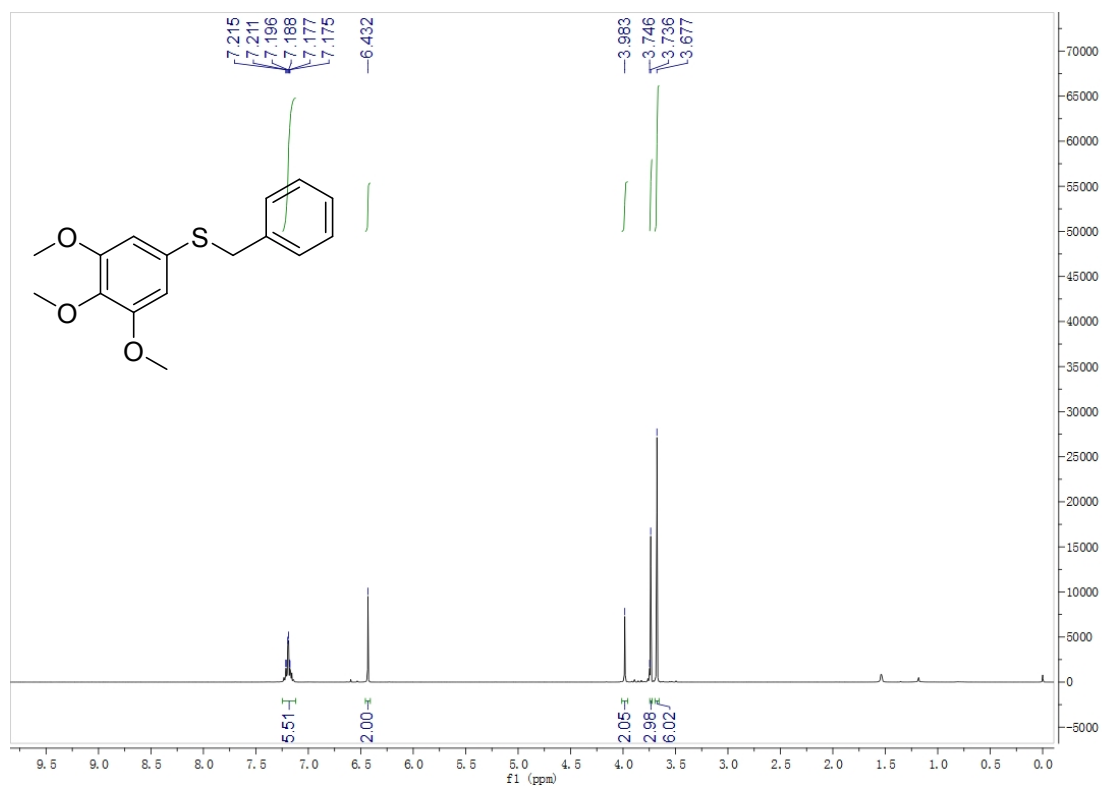

## 2p <sup>13</sup>C NMR

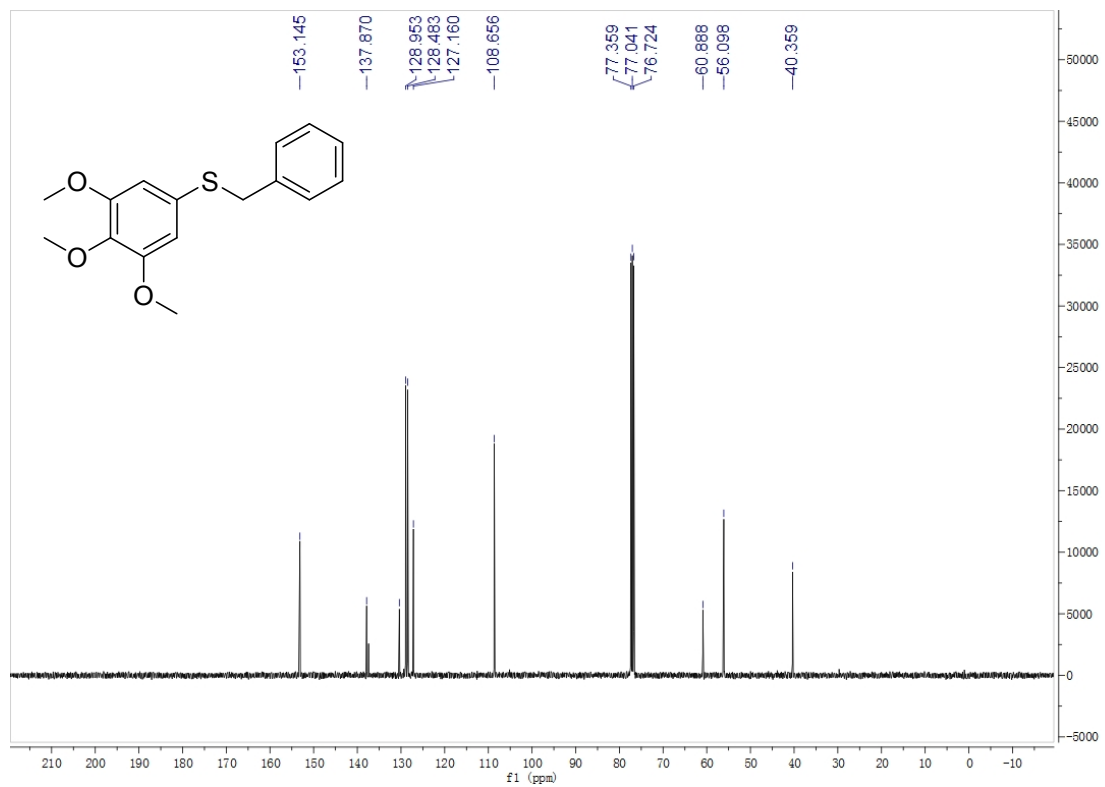

## 2q <sup>1</sup>H NMR

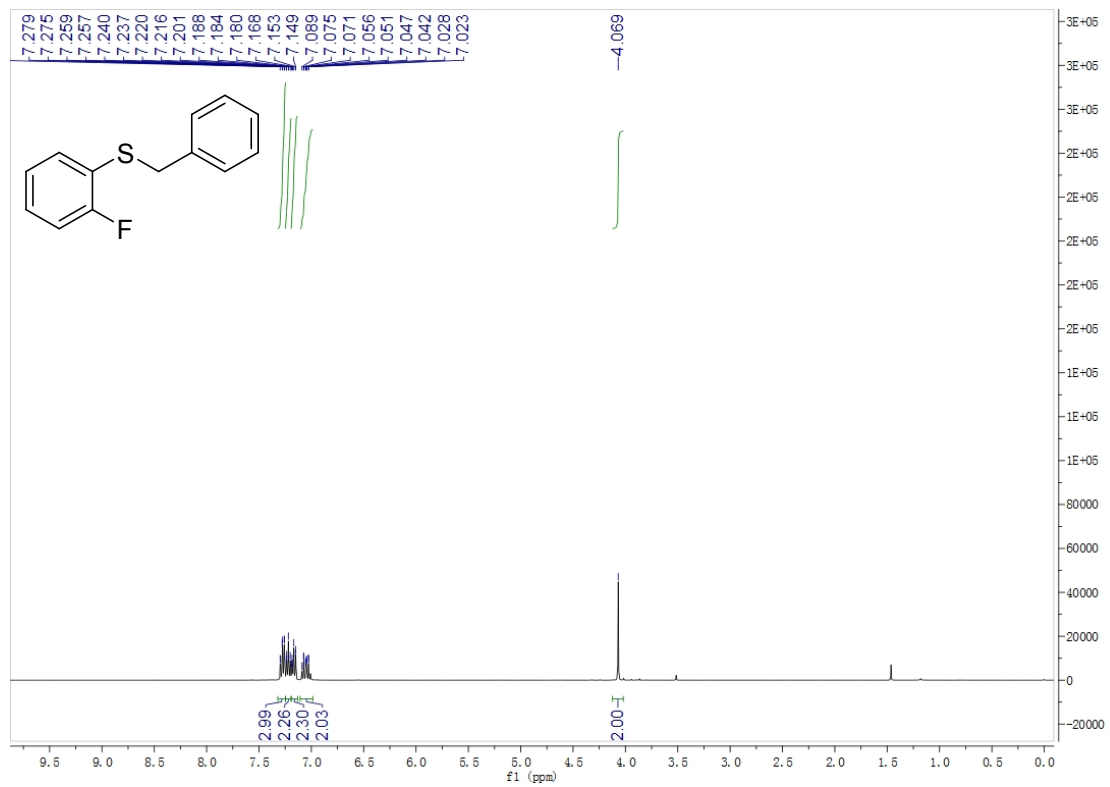

### 2q <sup>13</sup>C NMR

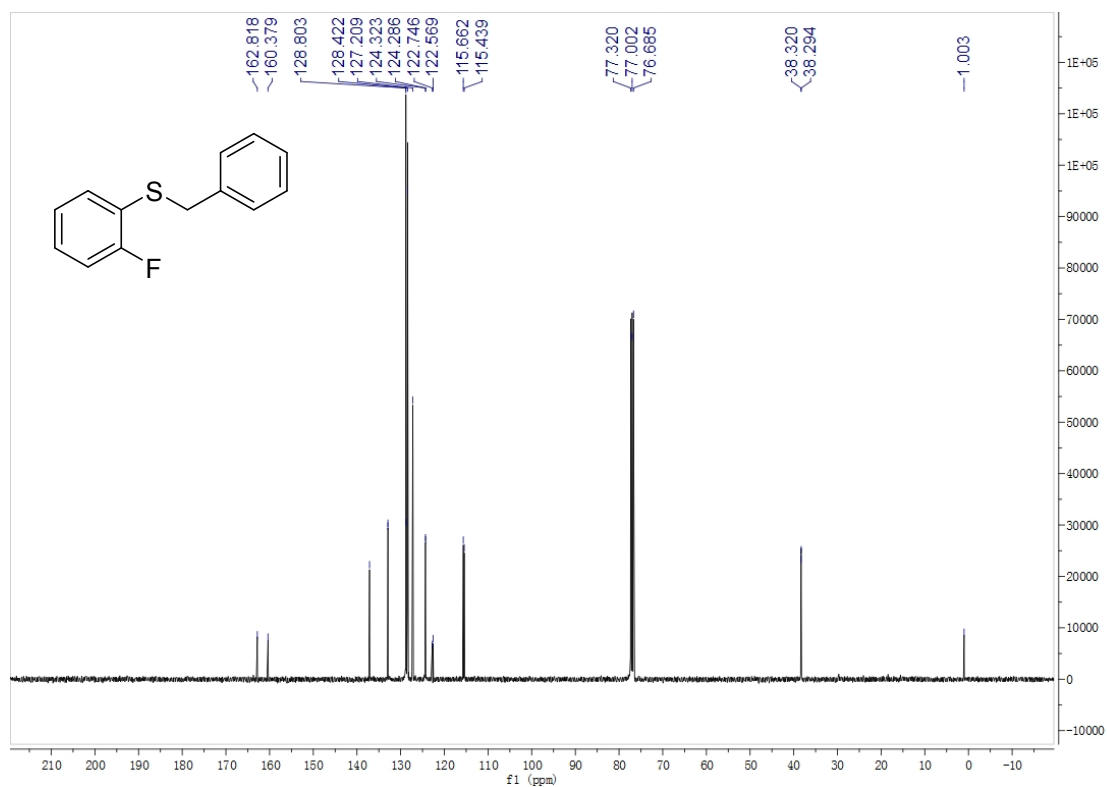

### 2q <sup>19</sup>F NMR

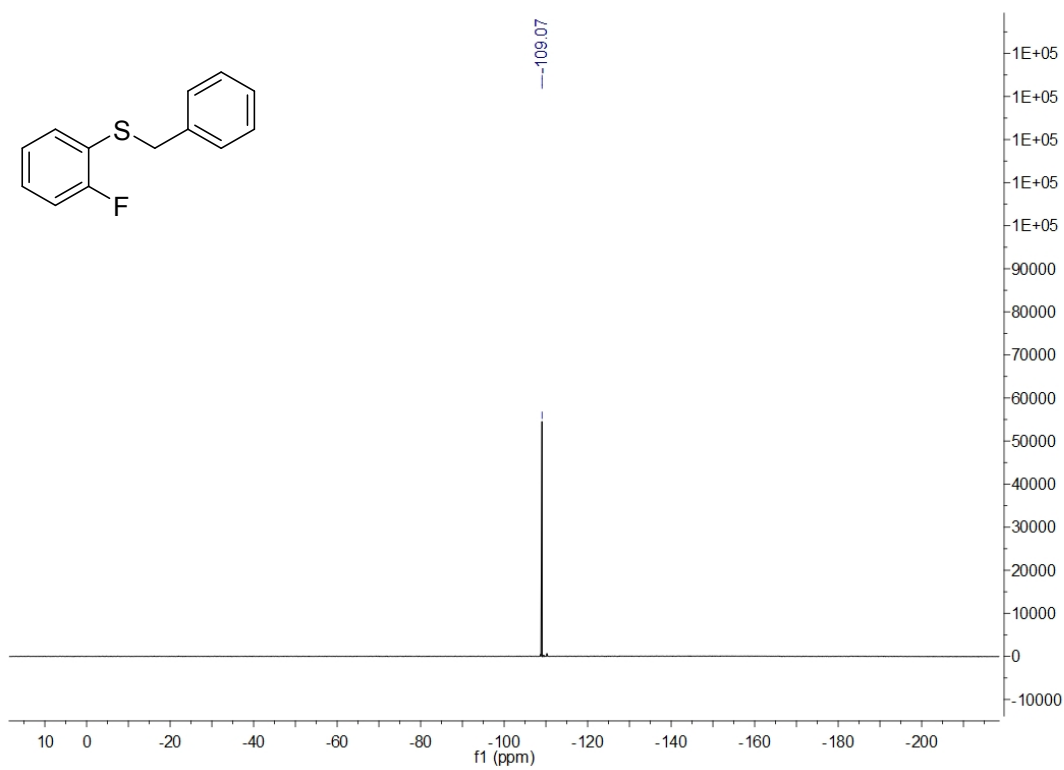

## 2r <sup>1</sup>H NMR

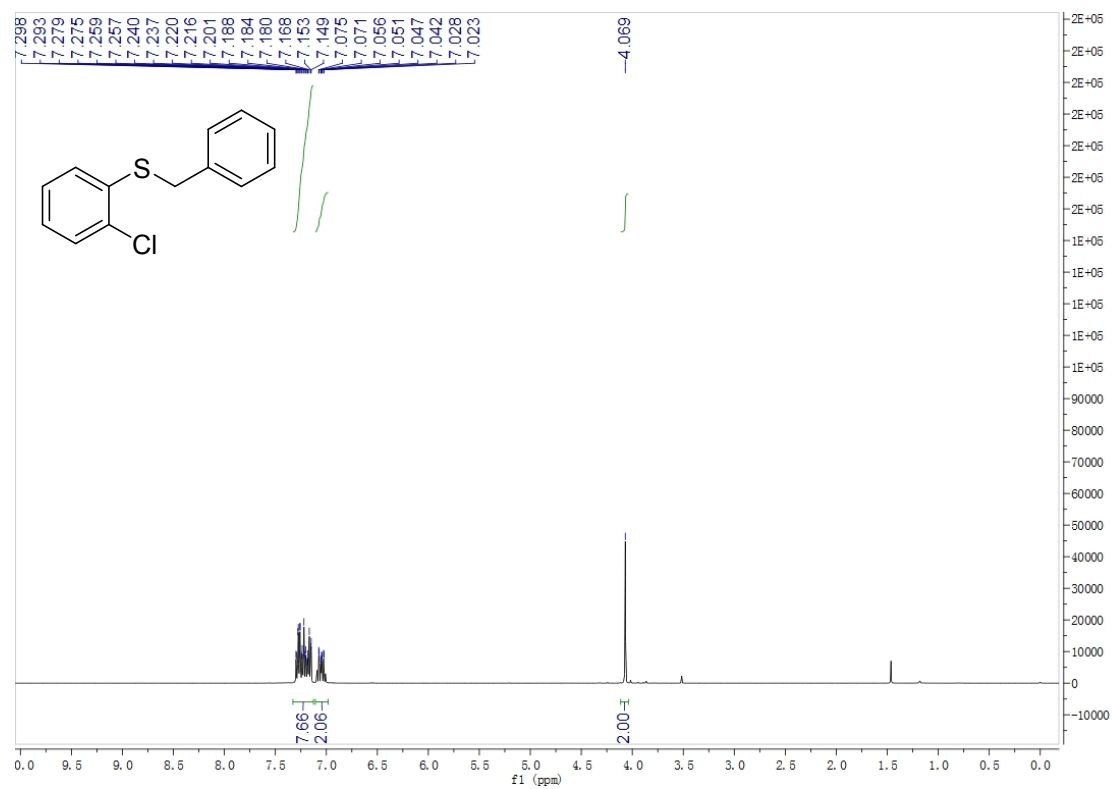

## 2r <sup>13</sup>C NMR

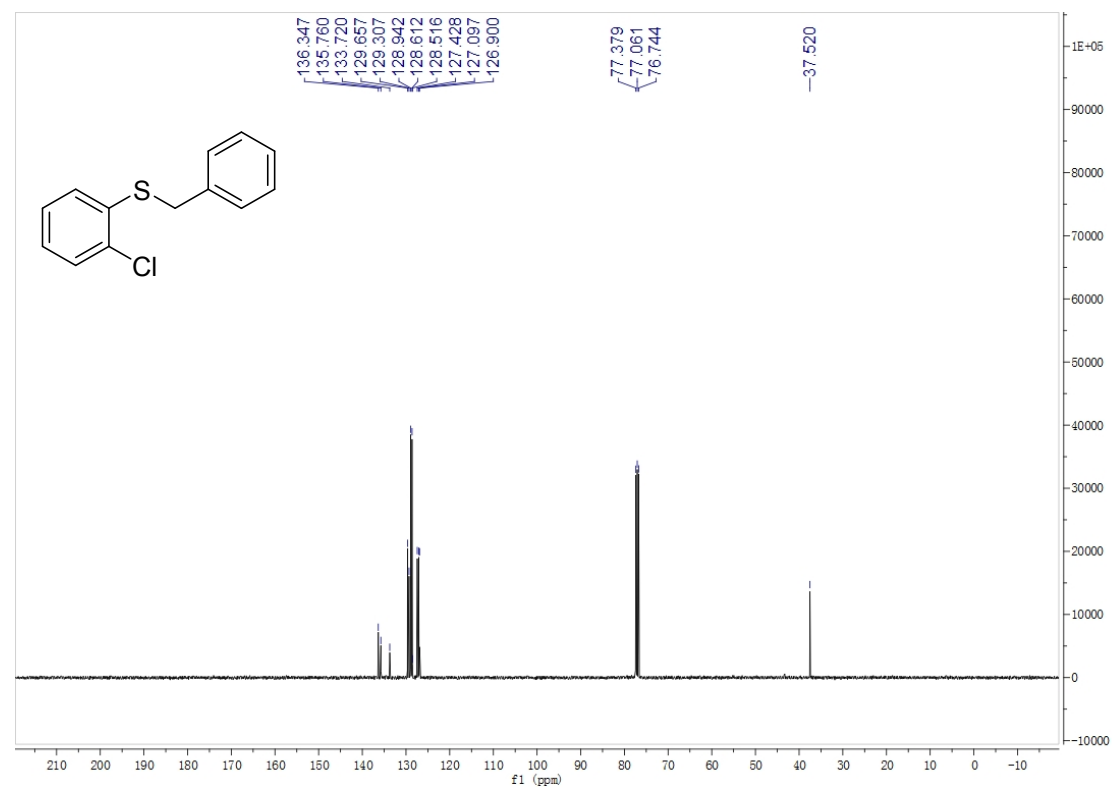

### 2s <sup>1</sup>H NMR

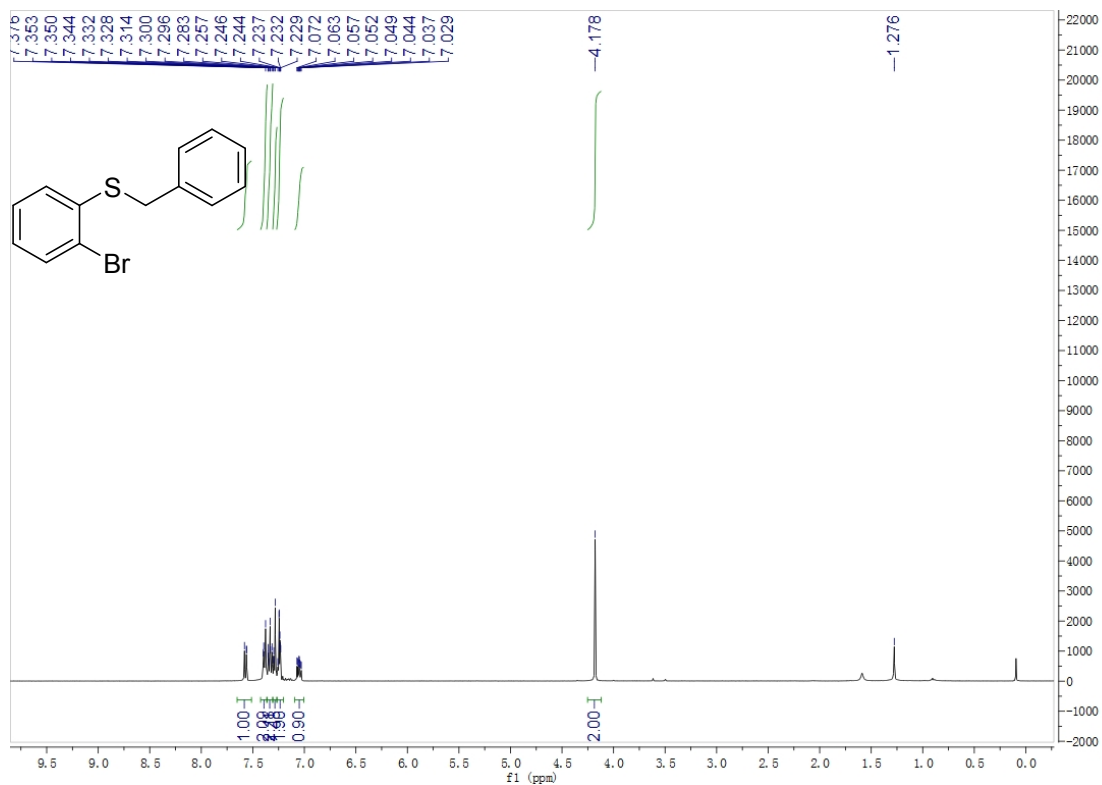

### 2s <sup>13</sup>C NMR

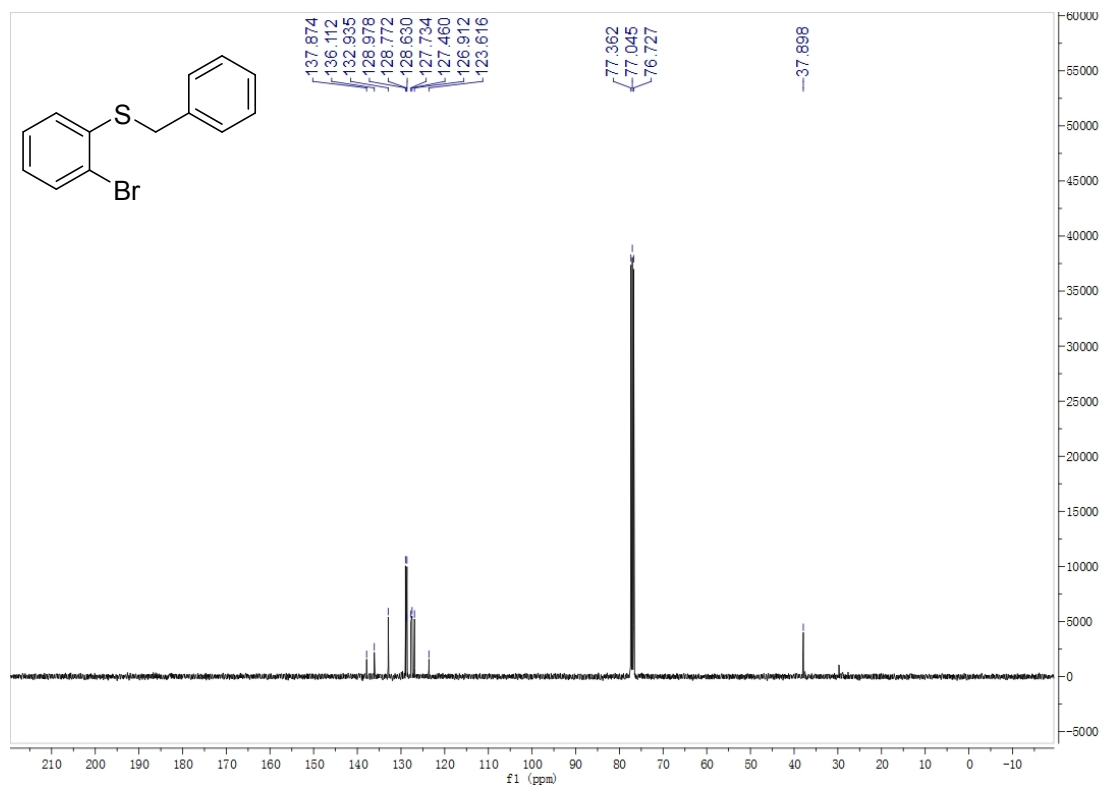



## 2t <sup>1</sup>H NMR

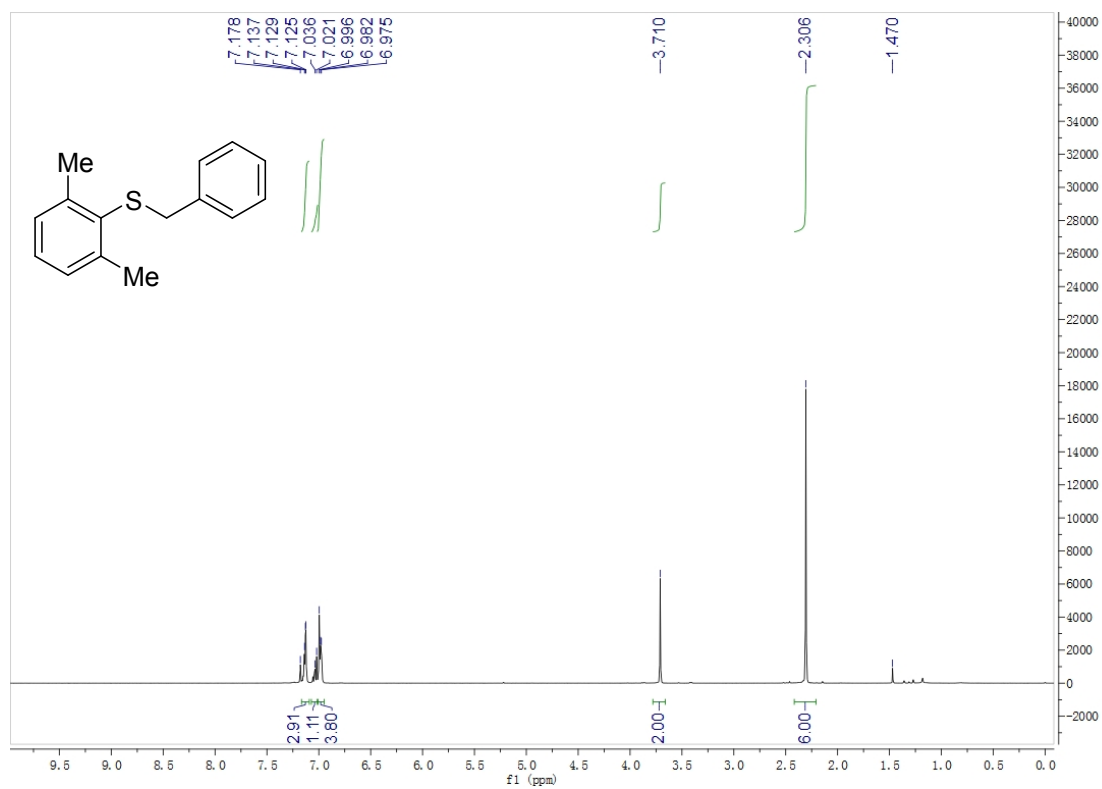

## 2t <sup>13</sup>C NMR

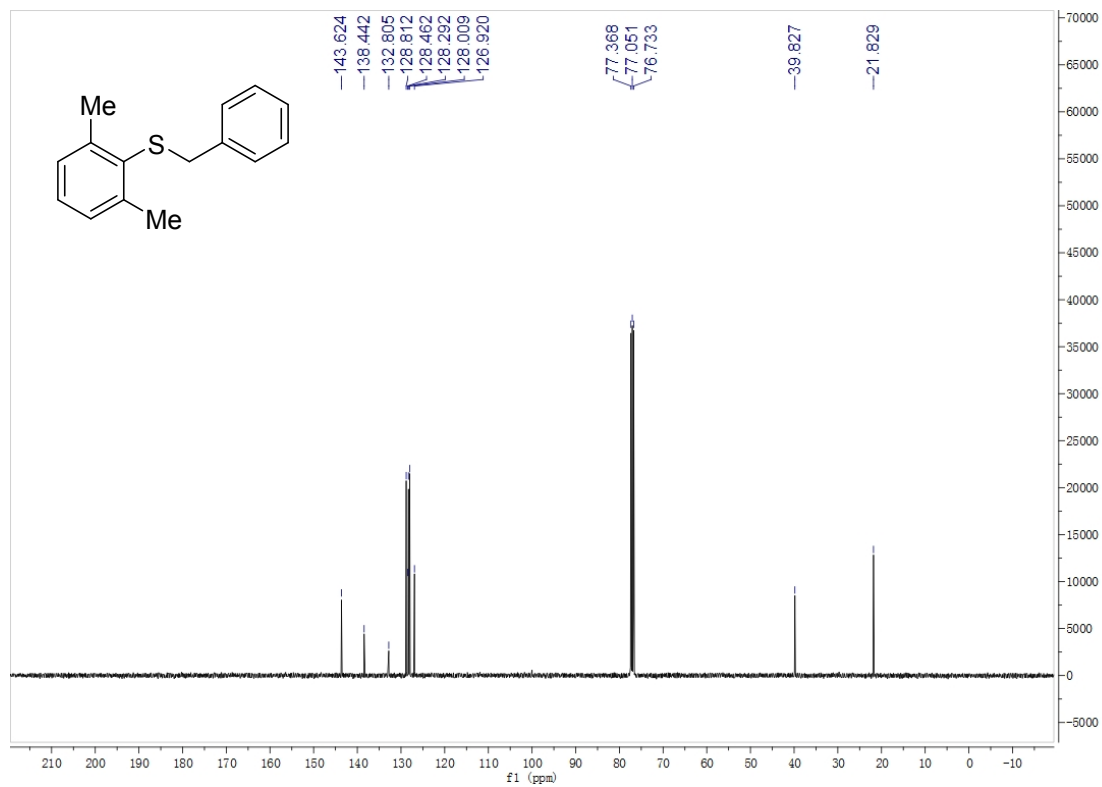

## 2u <sup>1</sup>H NMR

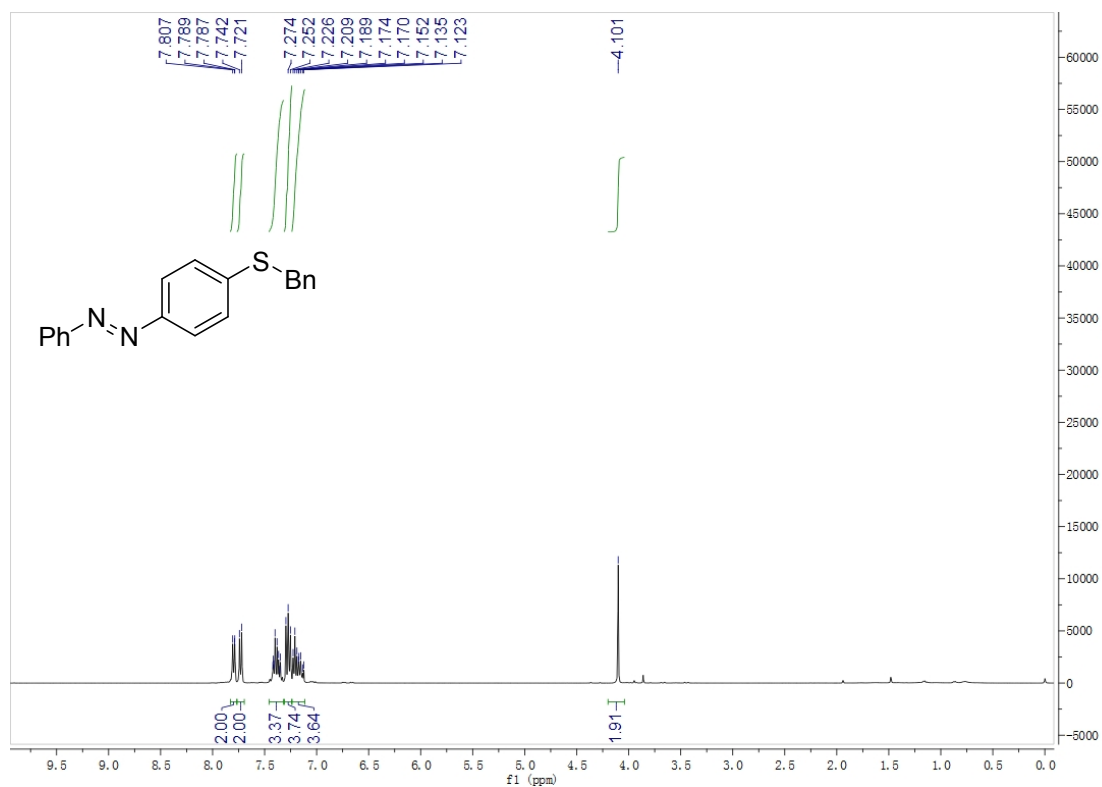

## 2u <sup>13</sup>C NMR

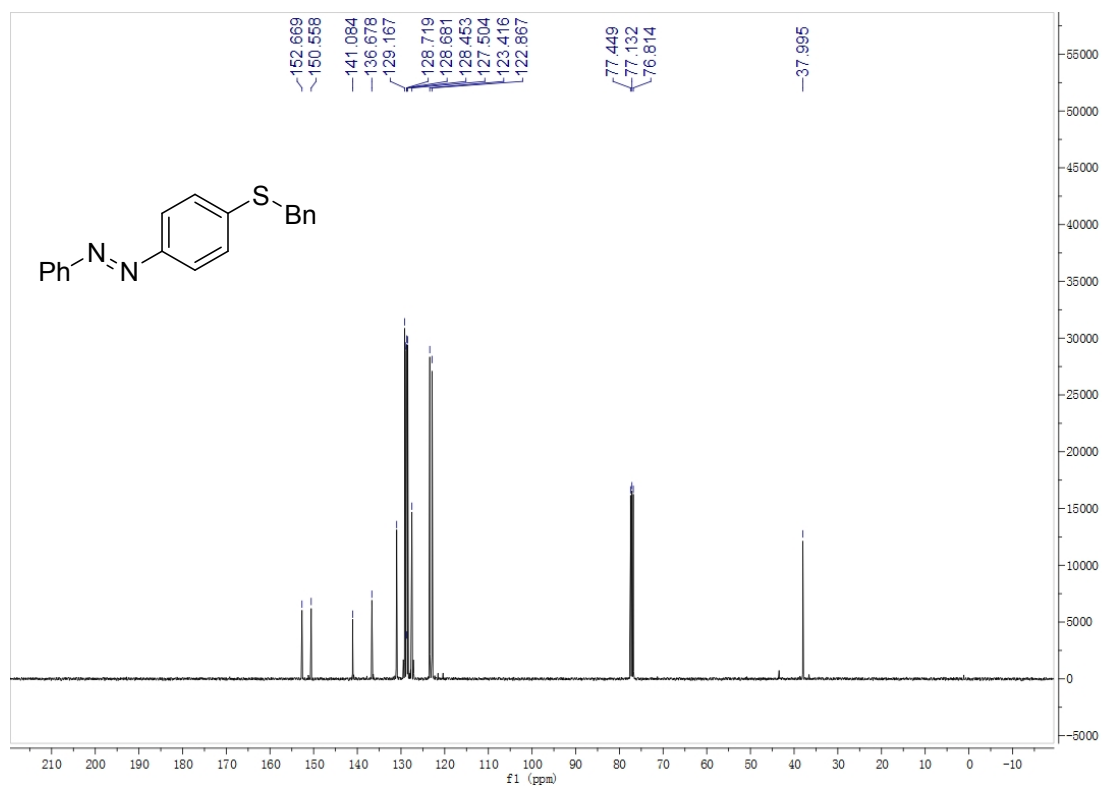

2v <sup>1</sup>H NMR

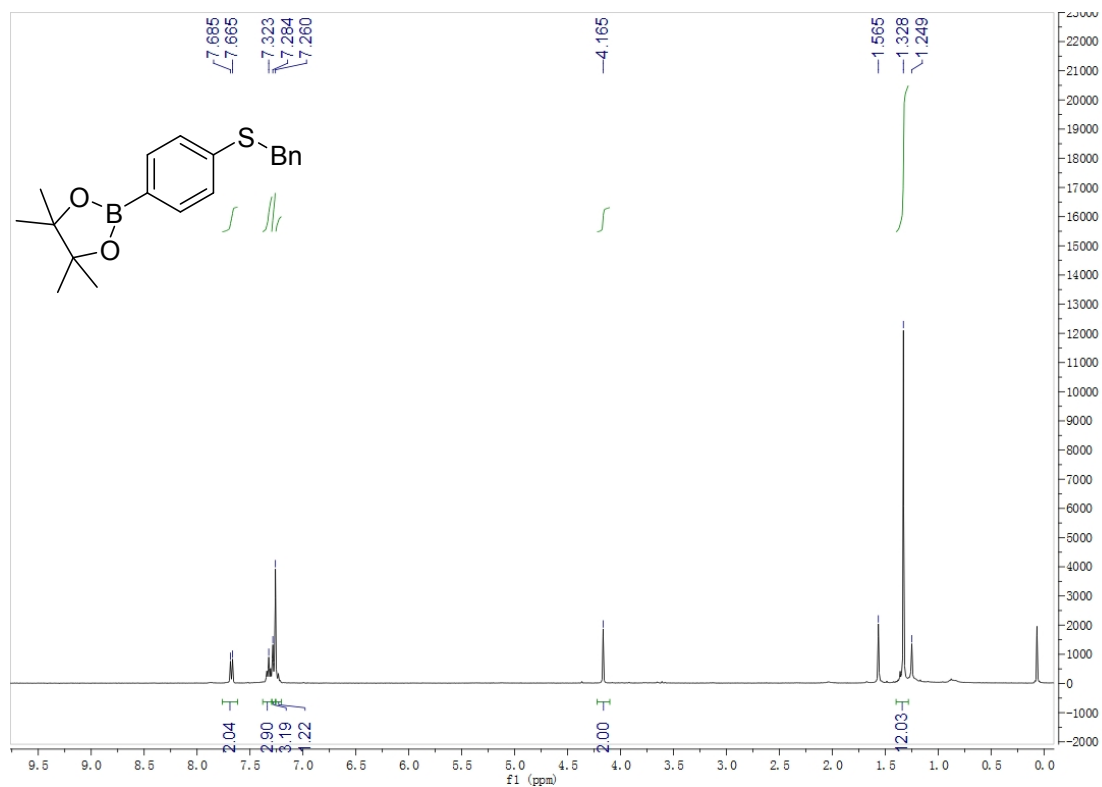

2v <sup>13</sup>C NMR

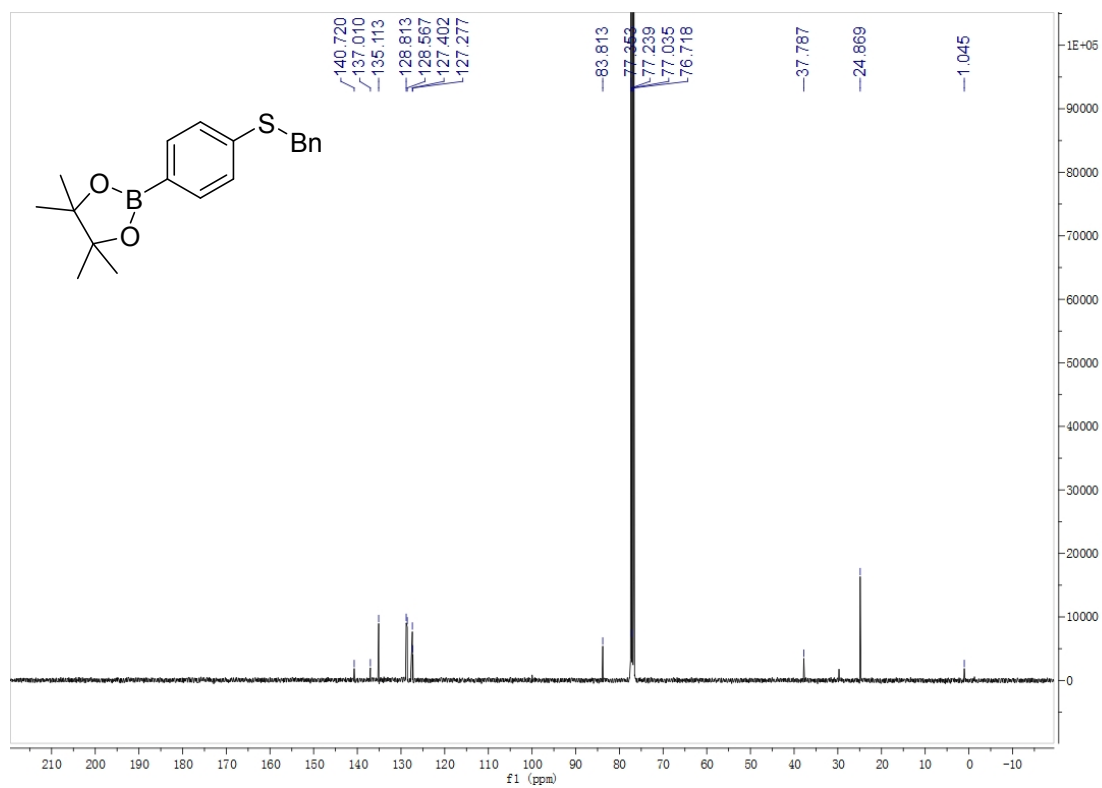

### 2w <sup>1</sup>H NMR

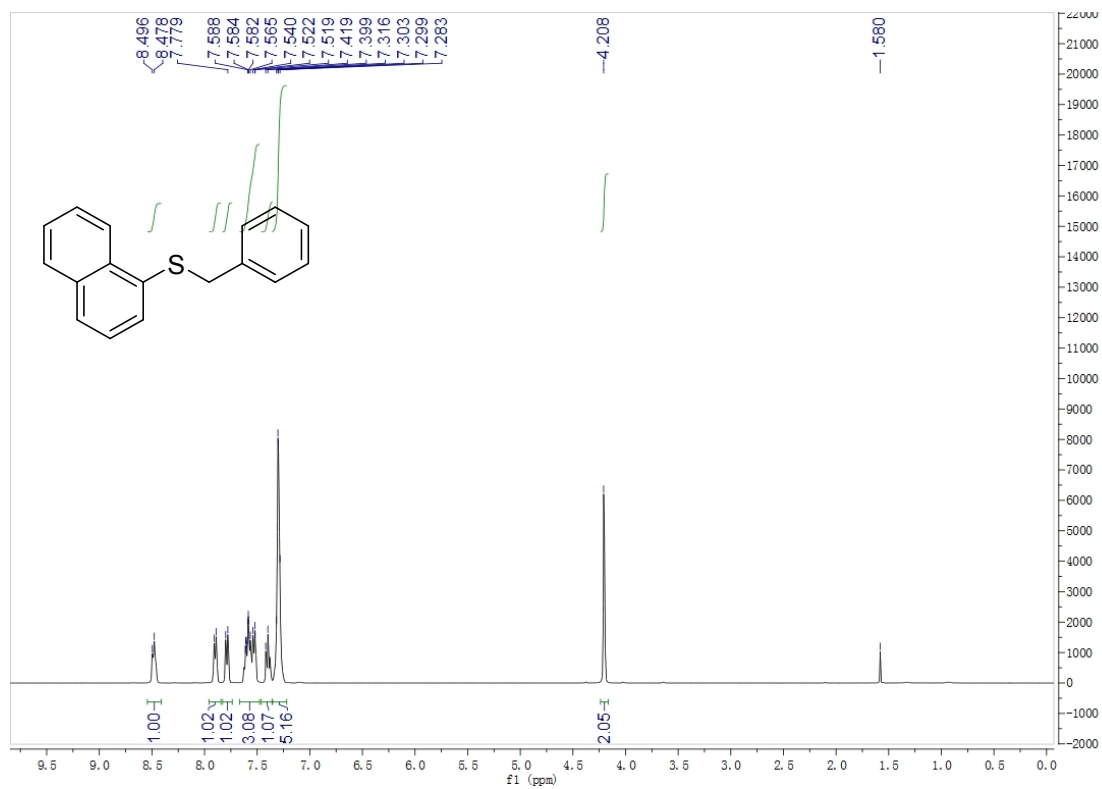

### 2w <sup>13</sup>C NMR

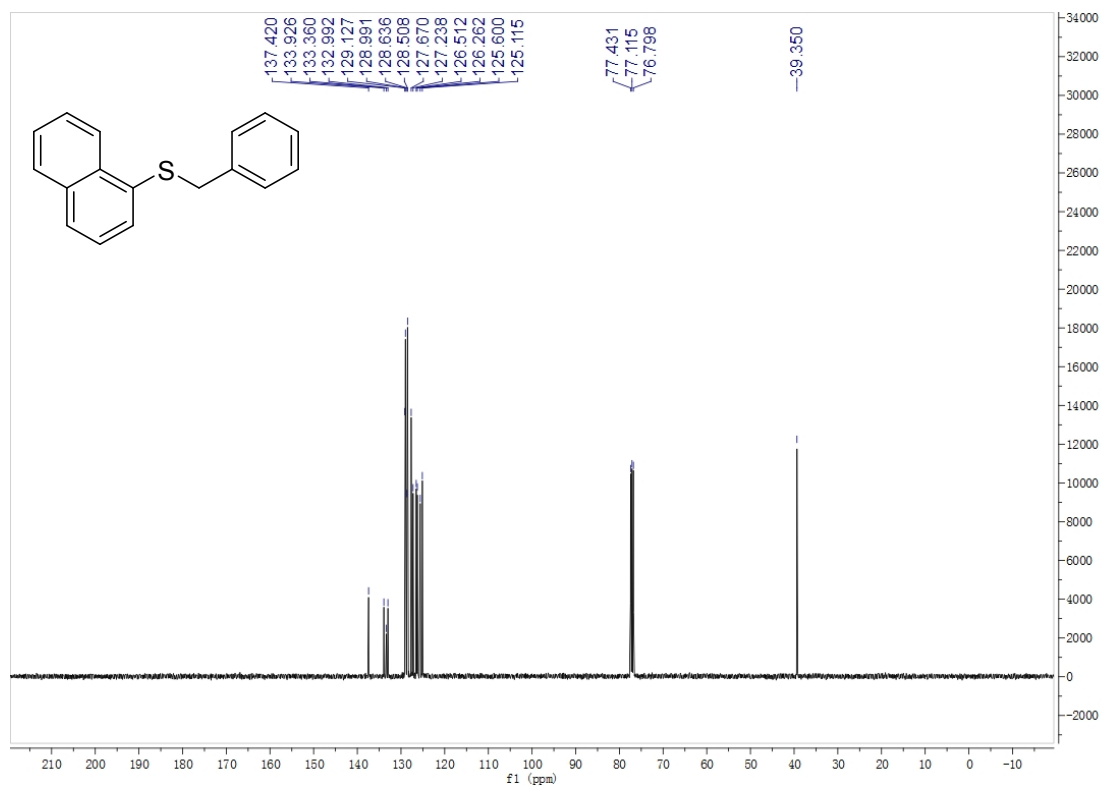

## 2x <sup>1</sup>H NMR

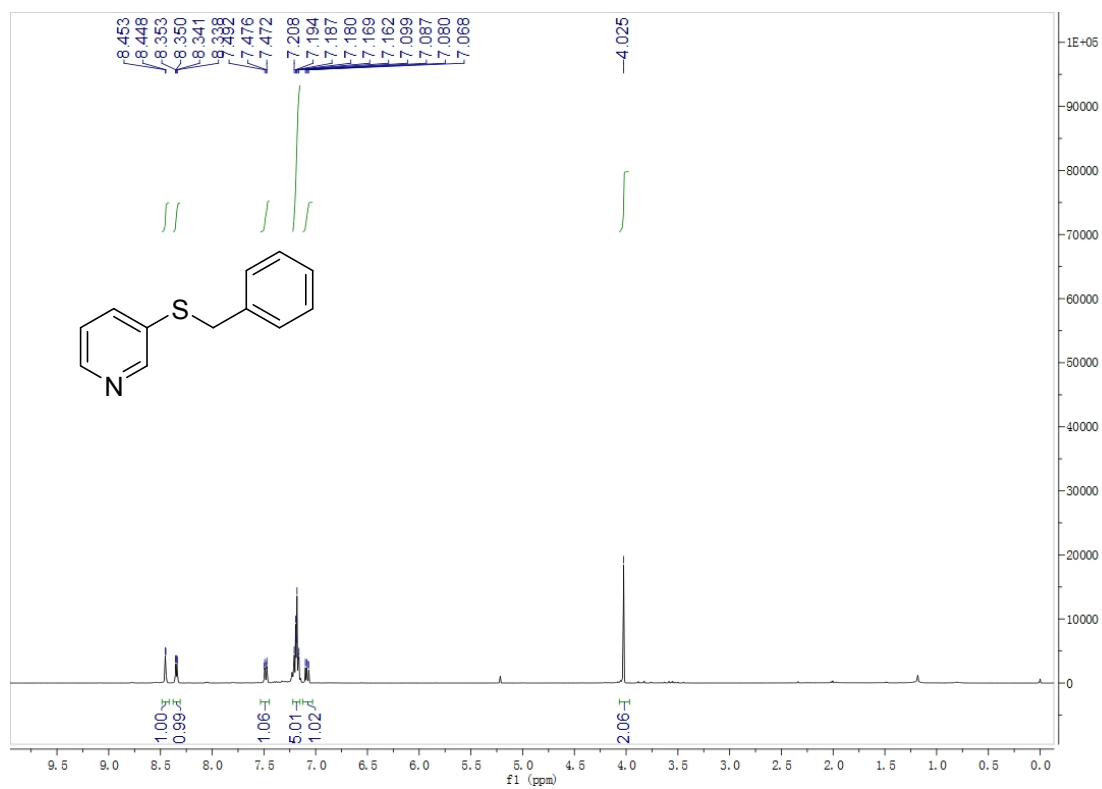

## 2x <sup>13</sup>C NMR

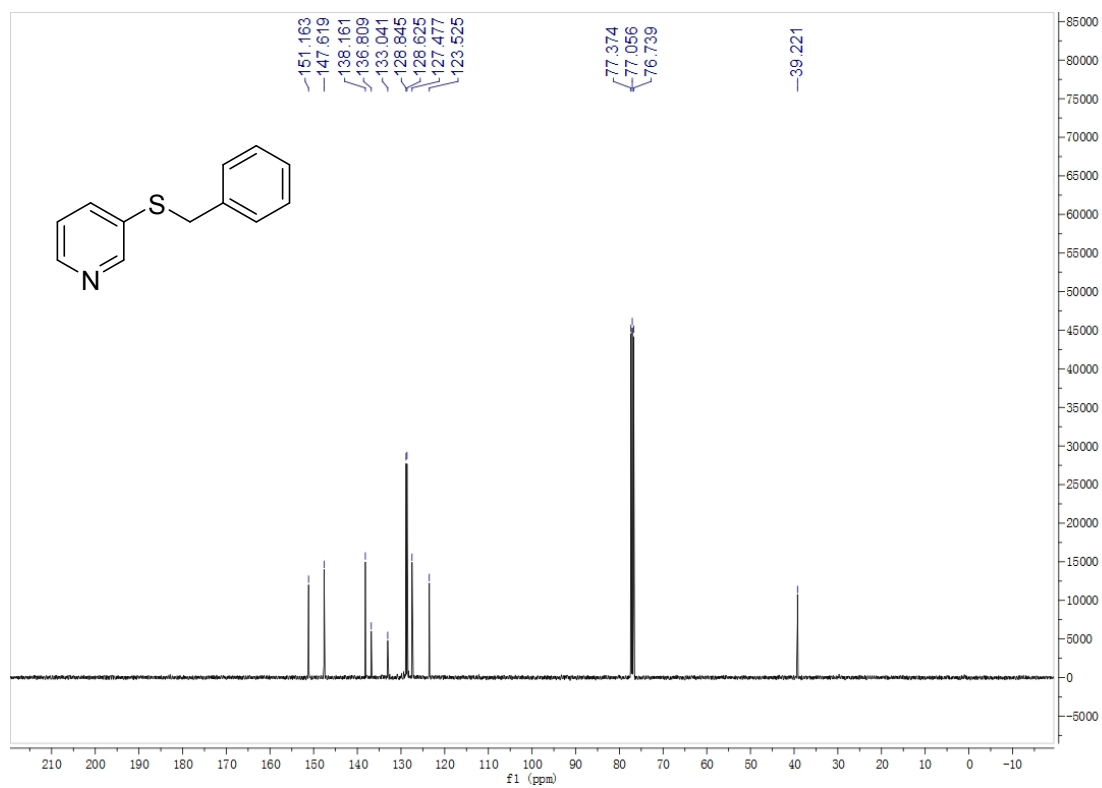

## 2y <sup>1</sup>H NMR

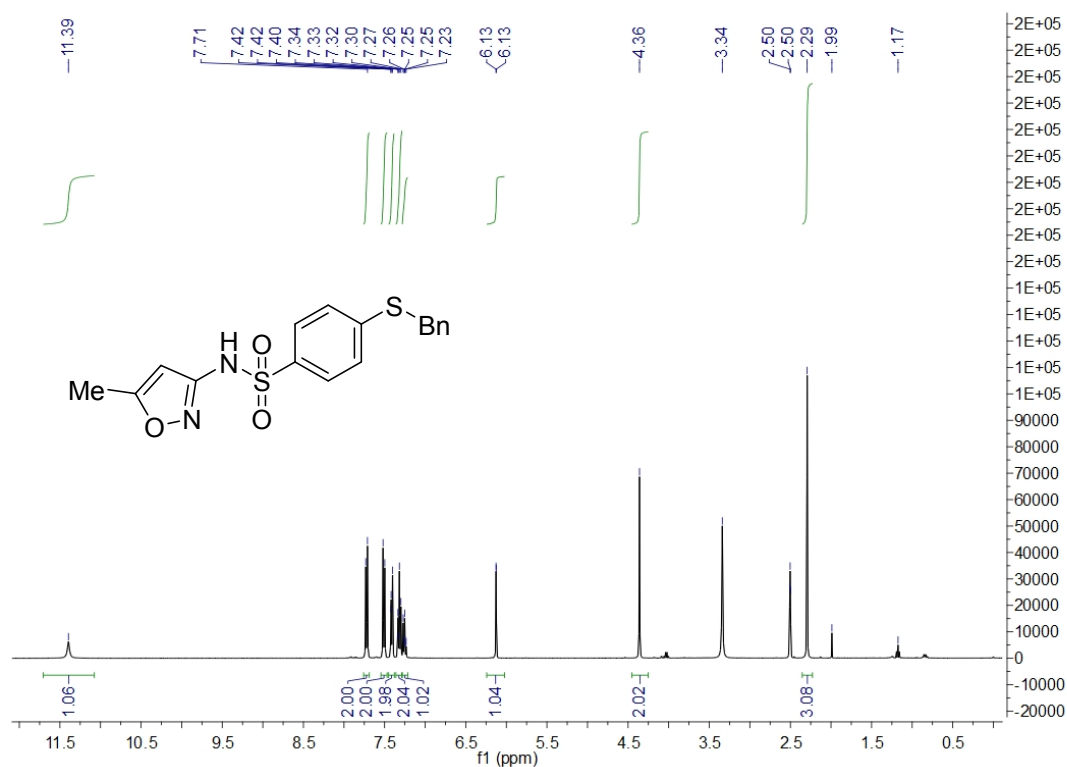

## 2y <sup>13</sup>C NMR

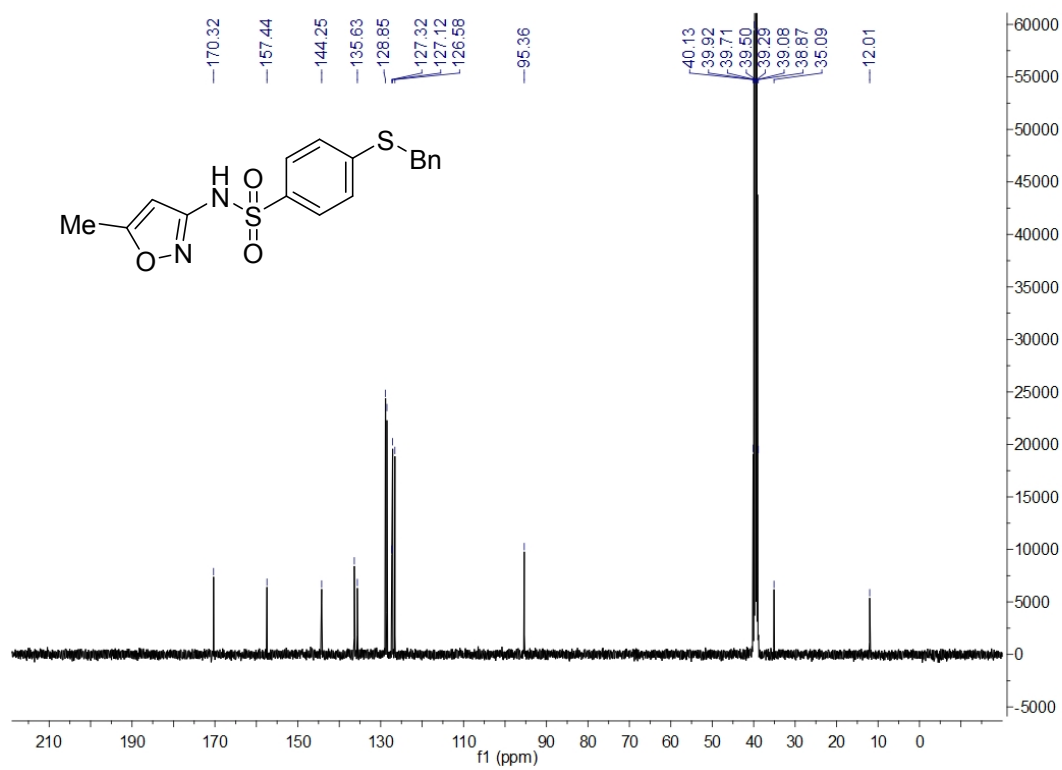

### 3a <sup>1</sup>H NMR

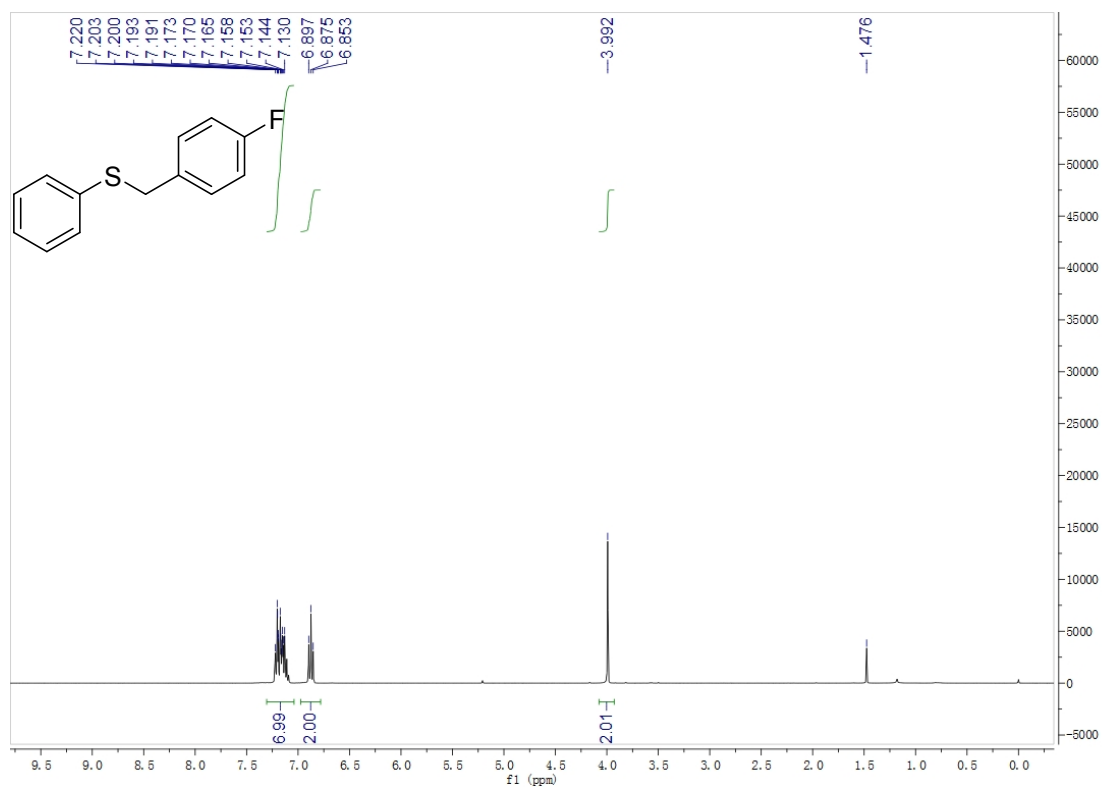

### 3a <sup>13</sup>C NMR

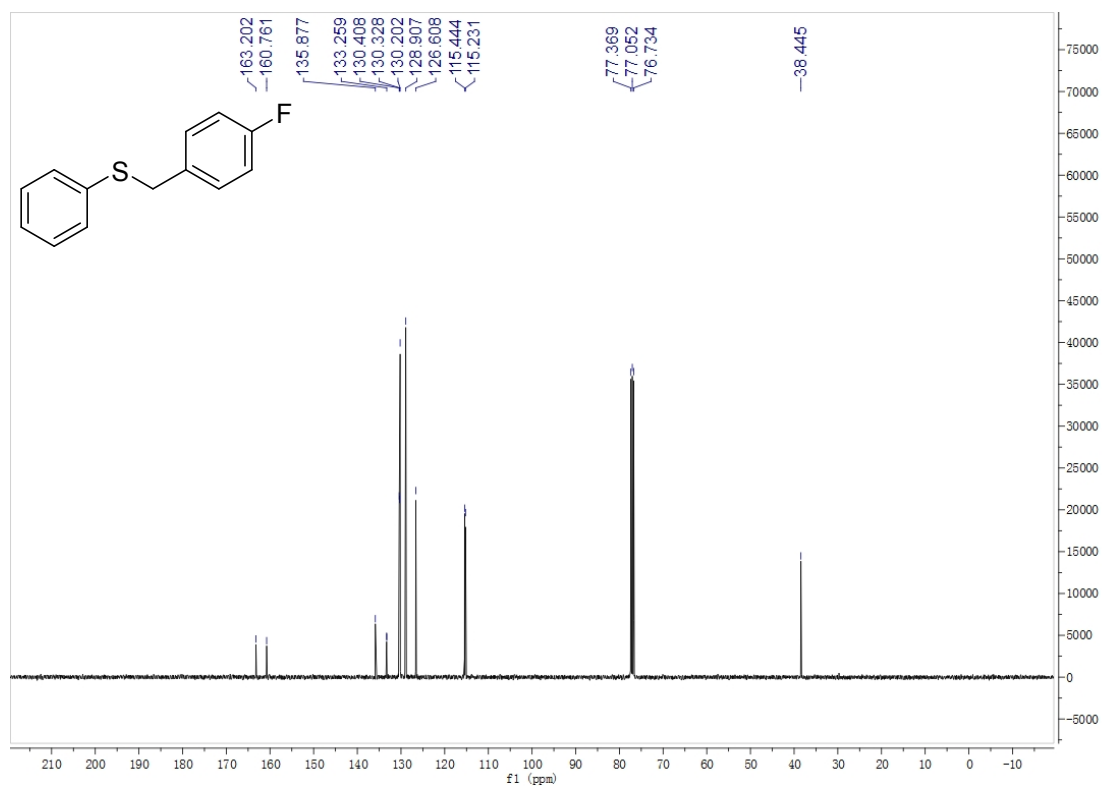

### 3a <sup>19</sup>F NMR

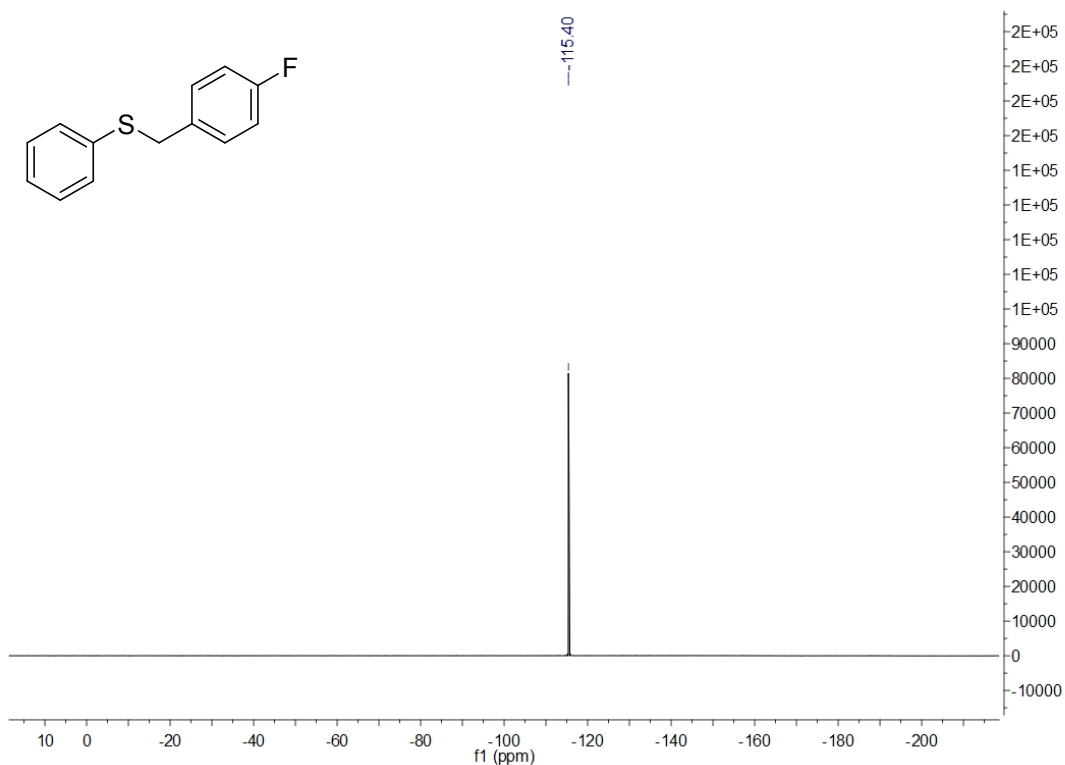

### 3b <sup>1</sup>H NMR

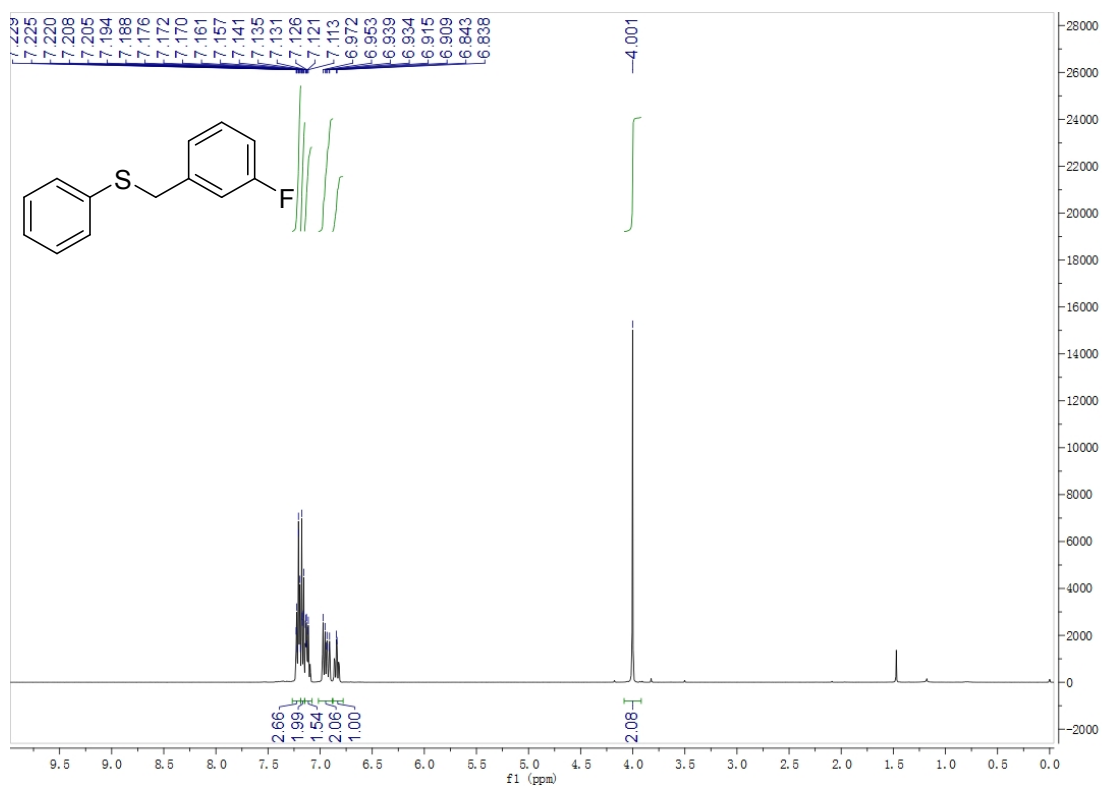



### 3b <sup>13</sup>C NMR

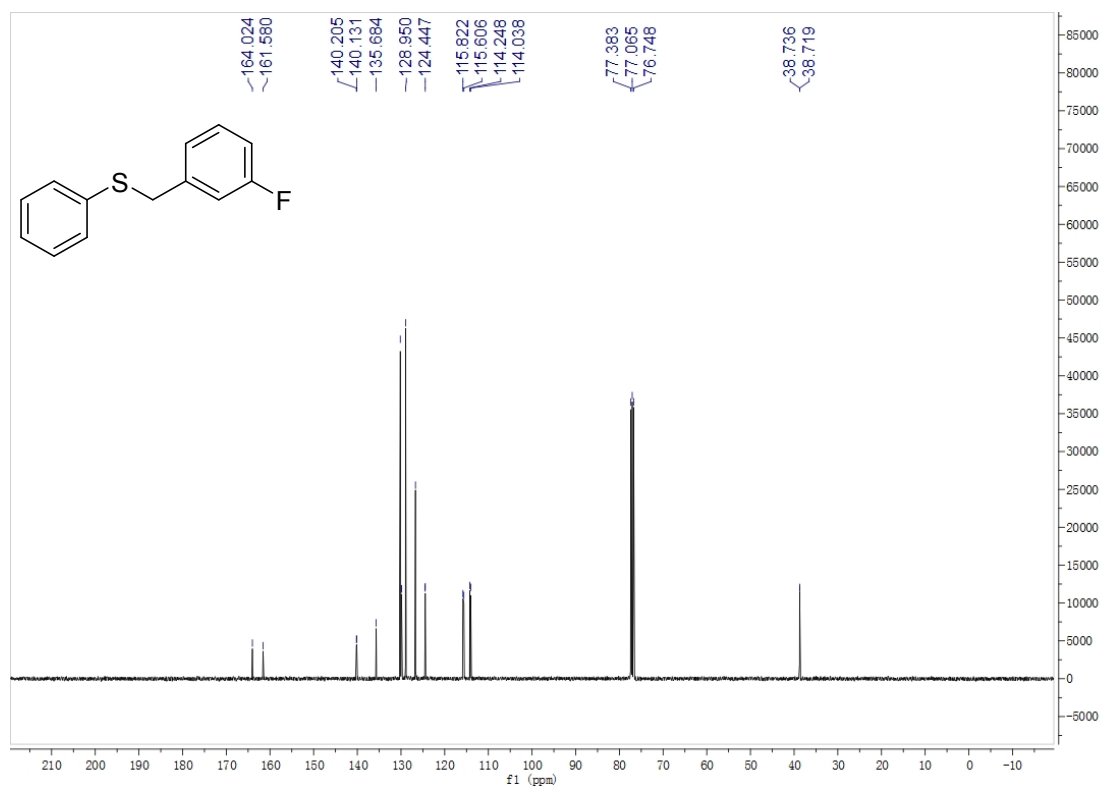

### 3b <sup>19</sup>F NMR

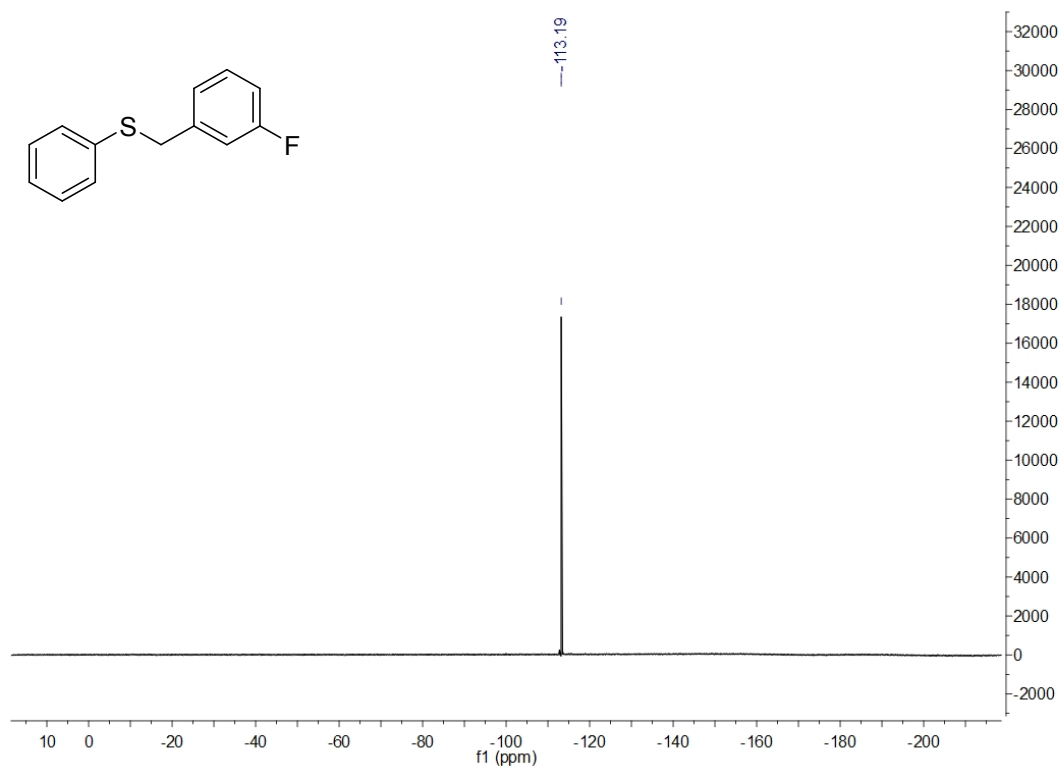

### 3c <sup>1</sup>H NMR

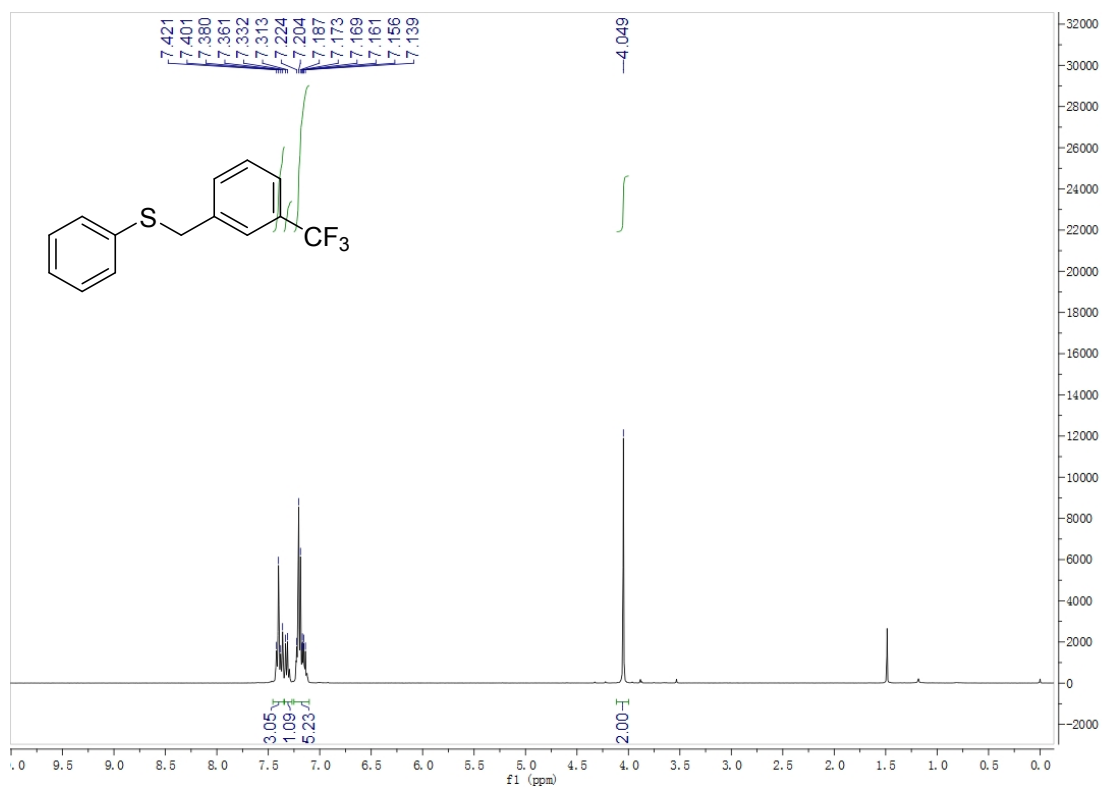

### 3c <sup>13</sup>C NMR

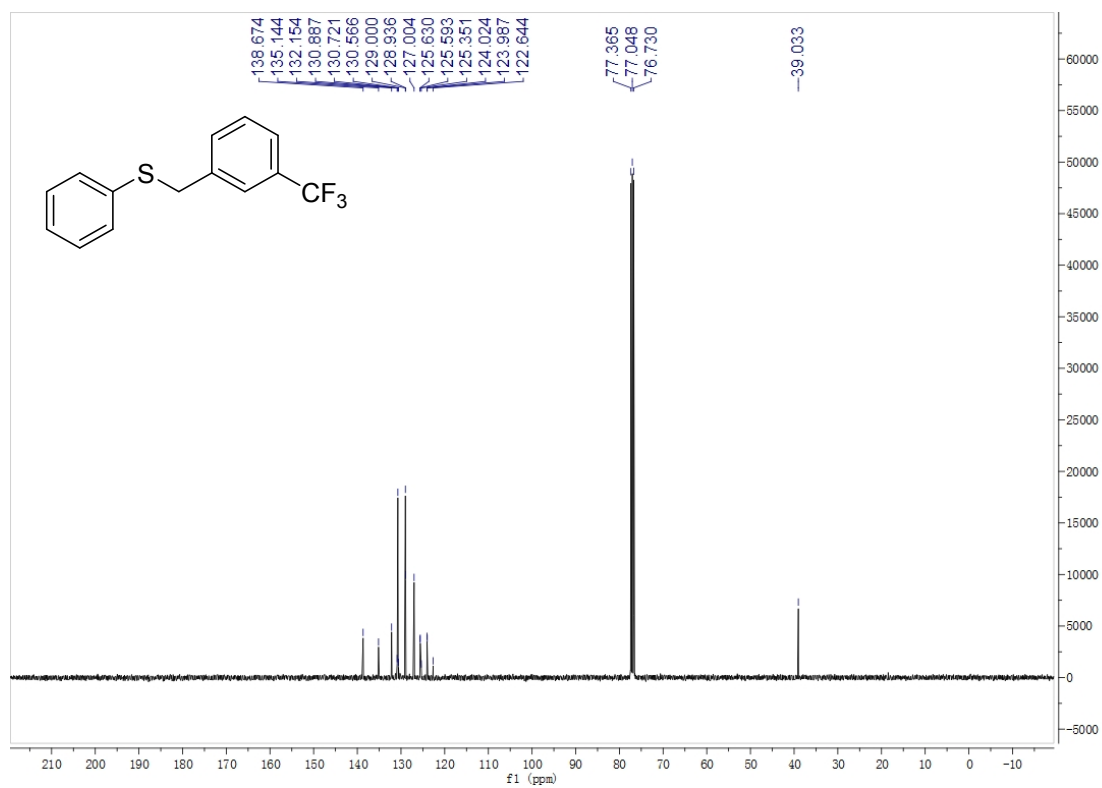

### 3c <sup>19</sup>F NMR

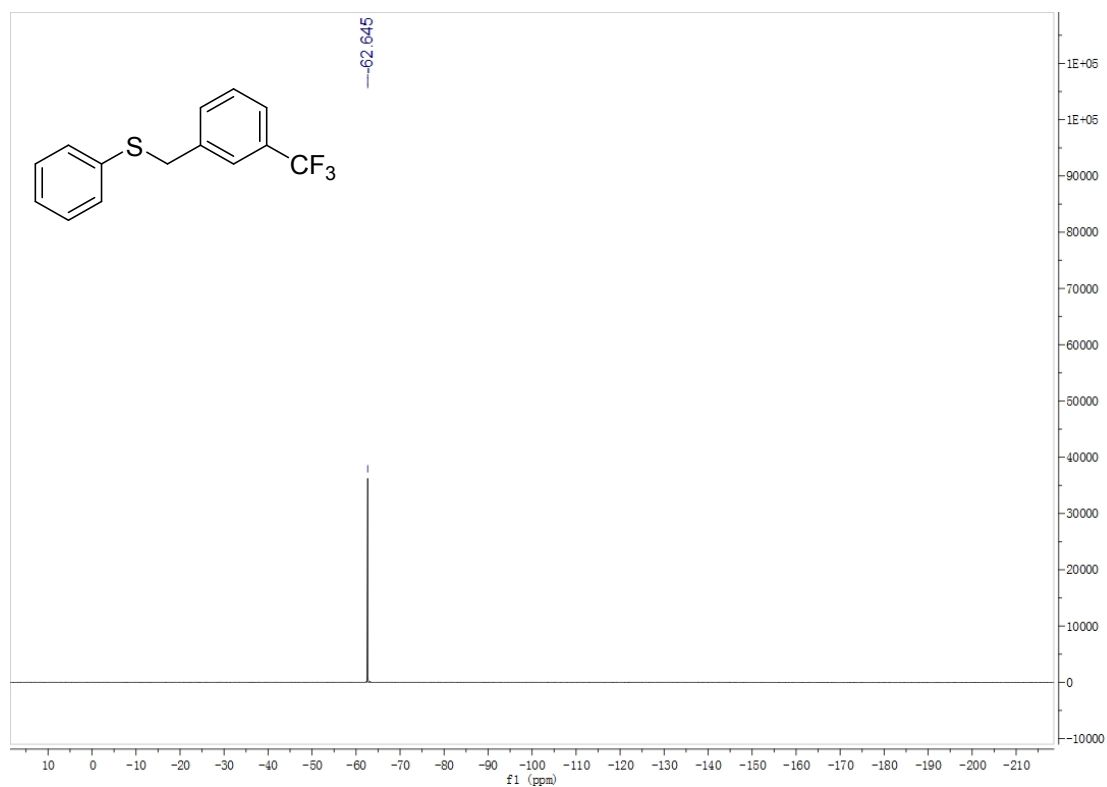

### 3d <sup>1</sup>H NMR

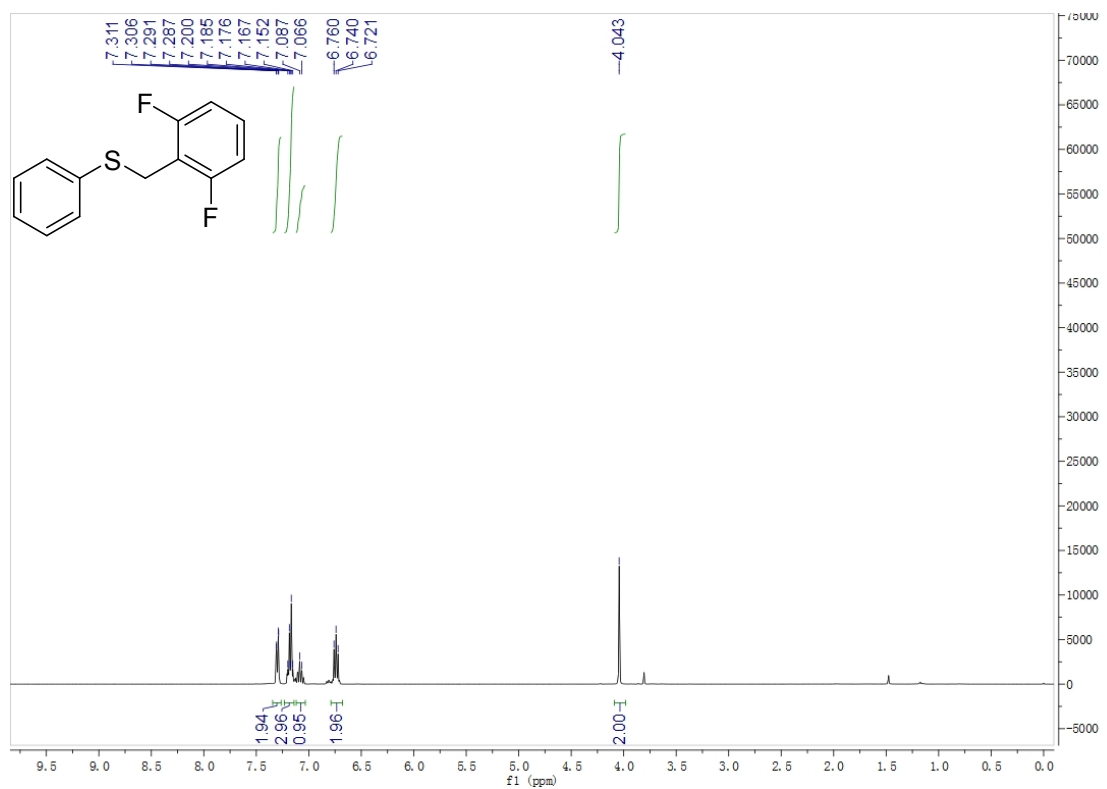

### 3d <sup>13</sup>C NMR

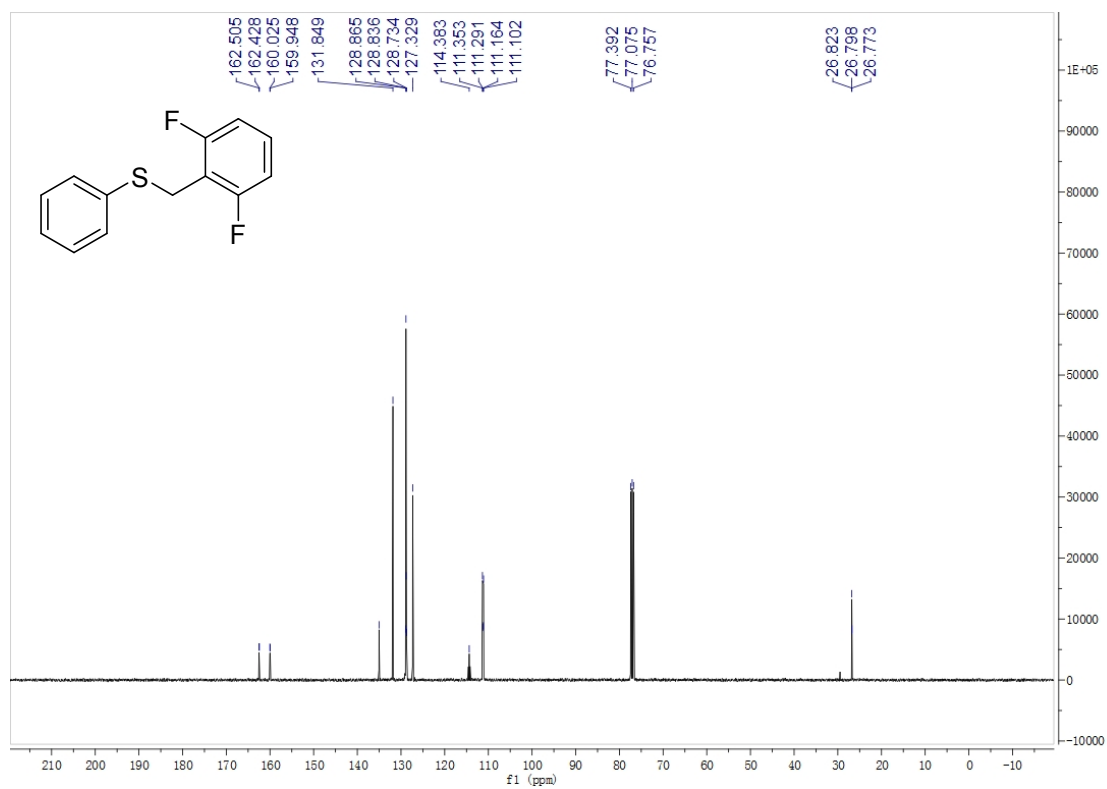

### 3d <sup>19</sup>F NMR

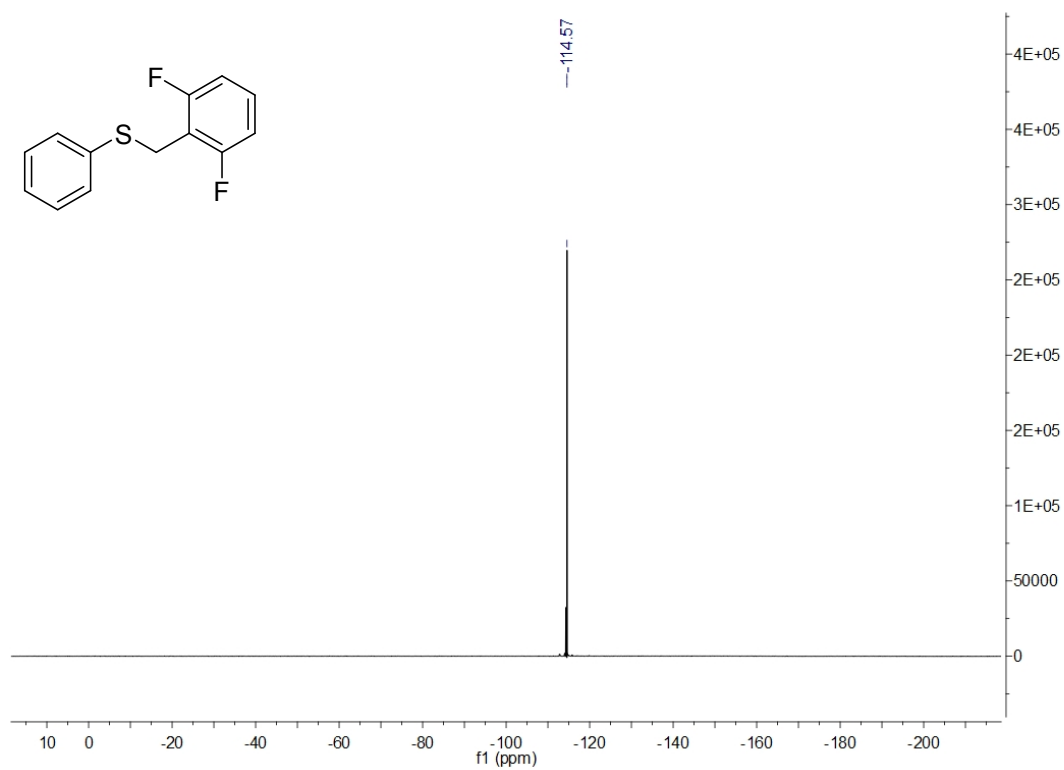

### 3e <sup>1</sup>H NMR

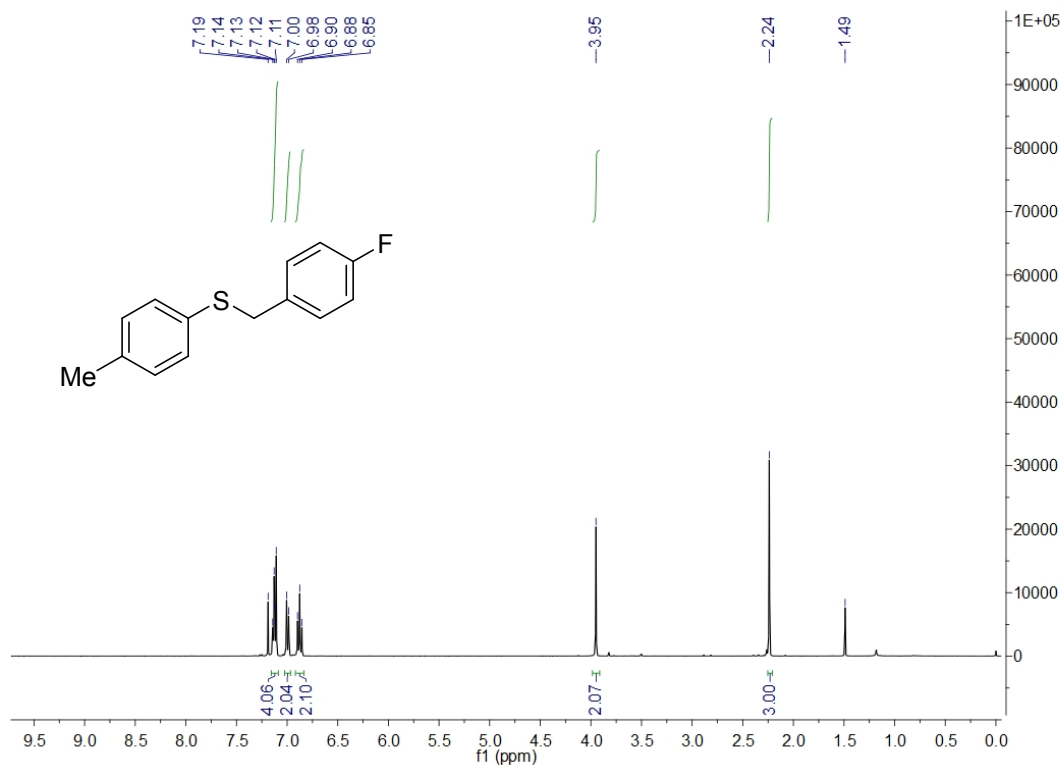

### 3e <sup>13</sup>C NMR

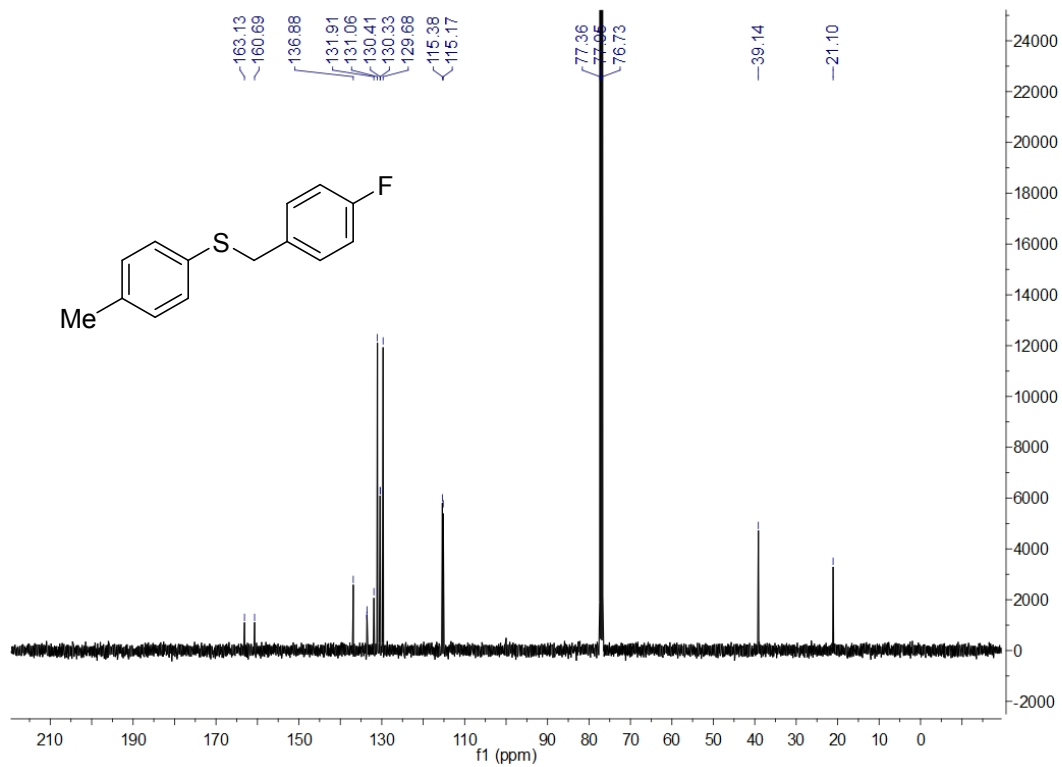

### 3e <sup>19</sup>F NMR

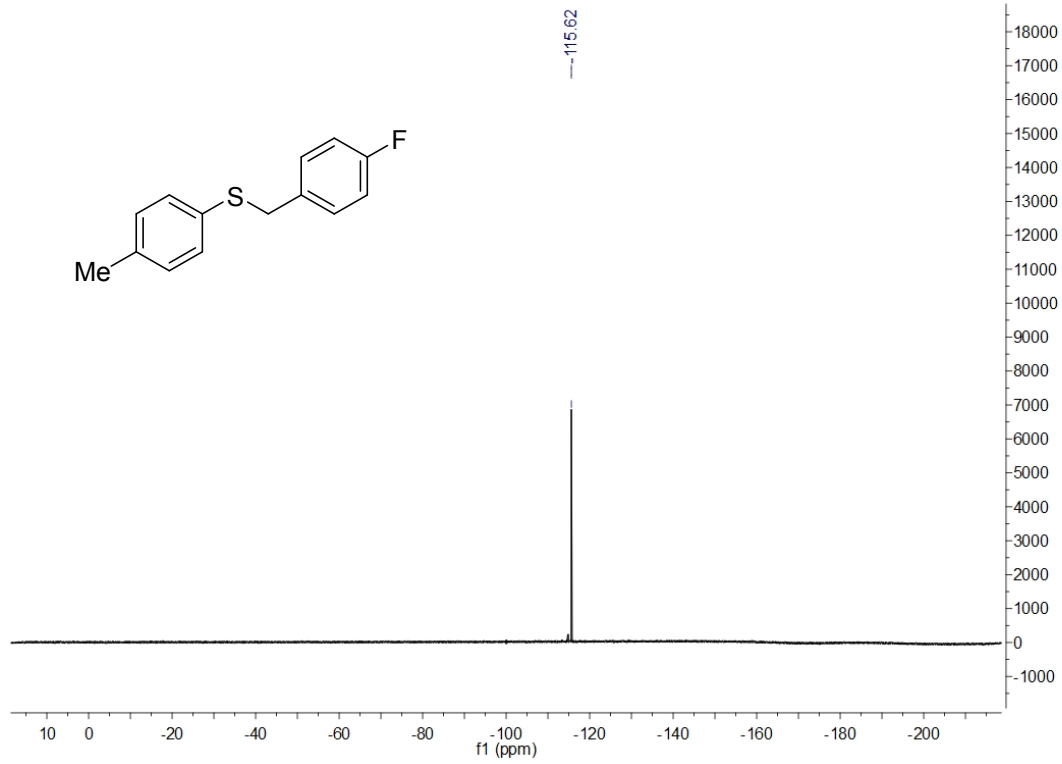

### 3f <sup>1</sup>H NMR

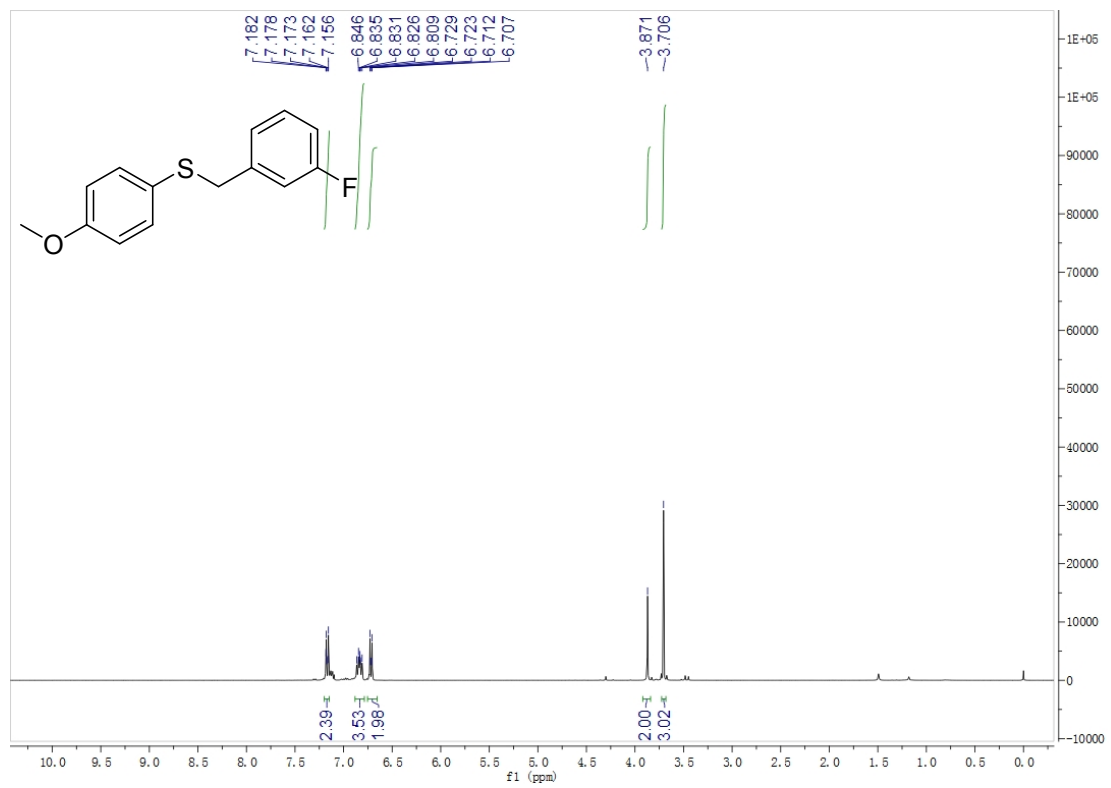

### 3f <sup>13</sup>C NMR

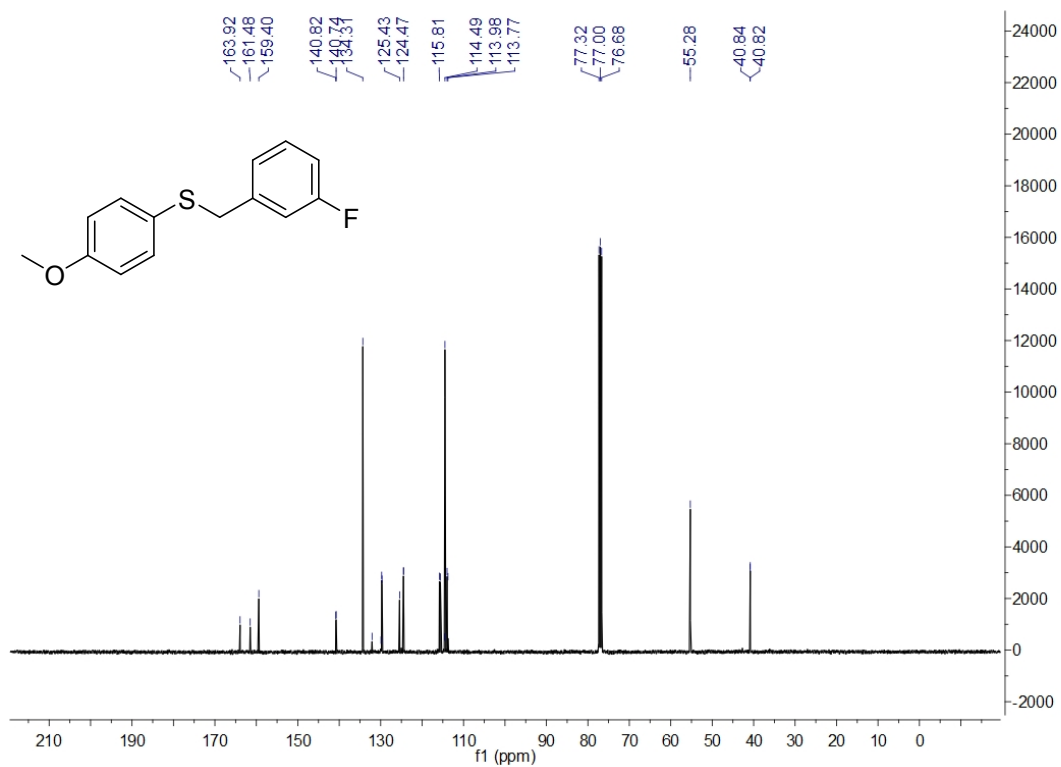

### 3f <sup>19</sup>F NMR

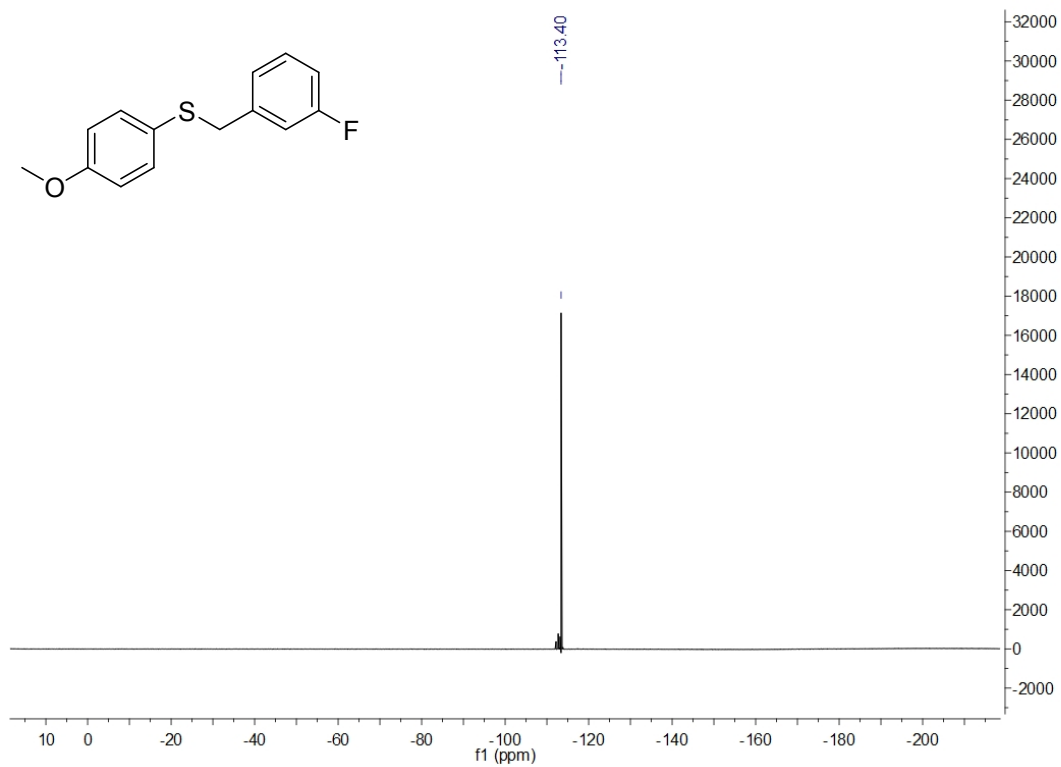

### 3g <sup>1</sup>H NMR

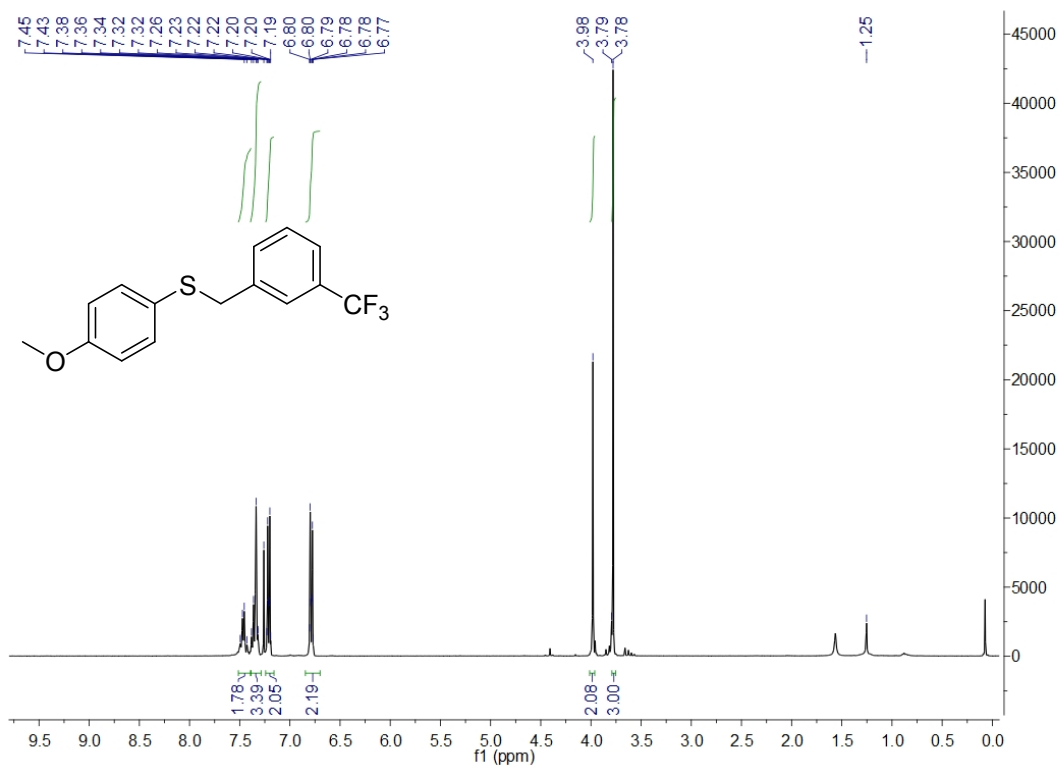

### 3g <sup>13</sup>C NMR

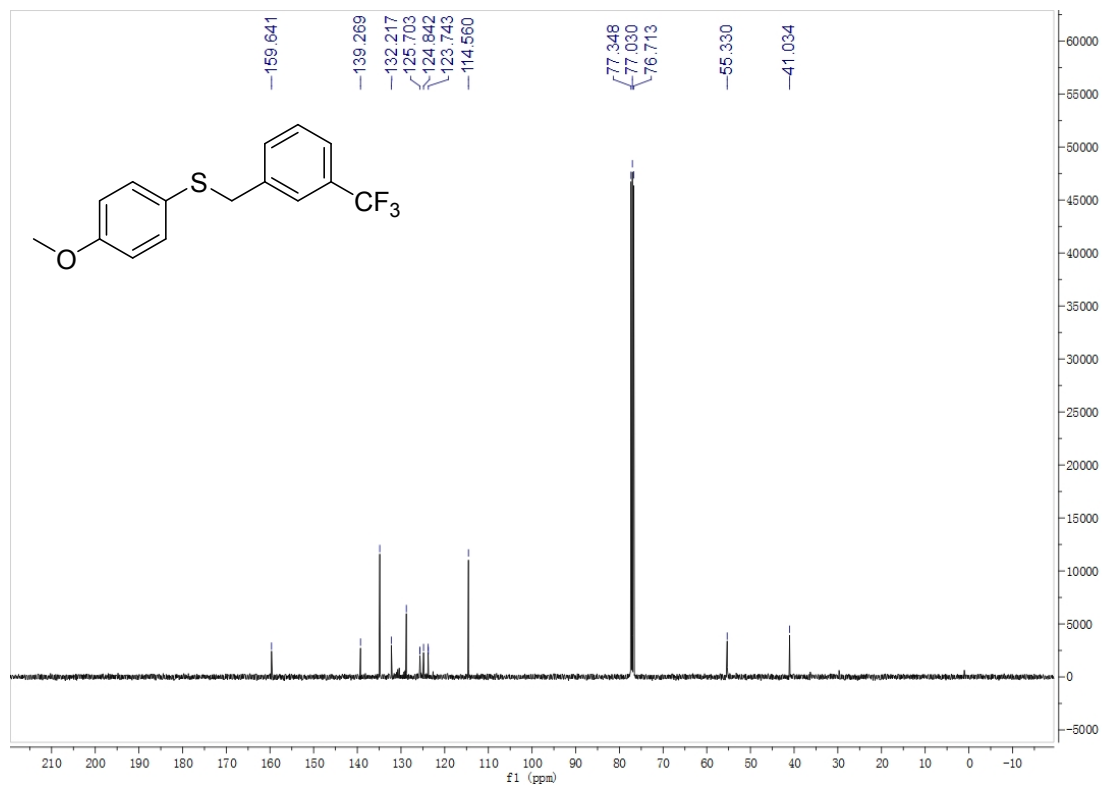



### 3g <sup>19</sup>F NMR

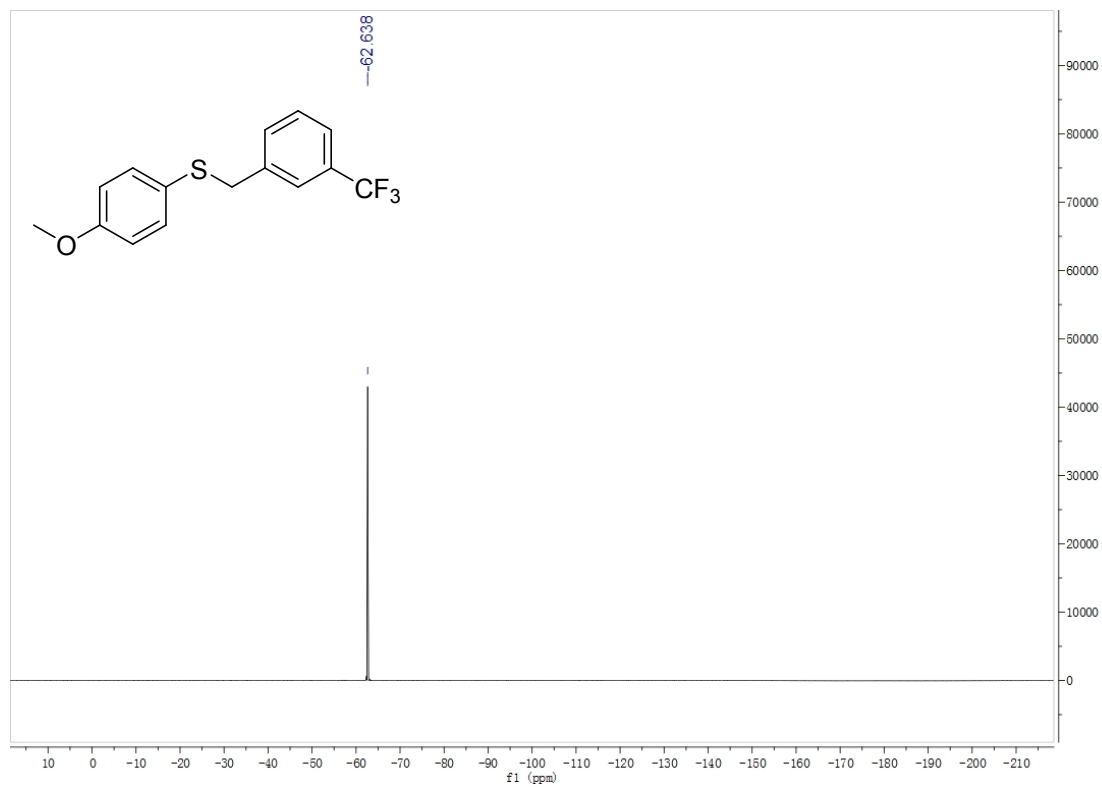

### 3h <sup>1</sup>H NMR

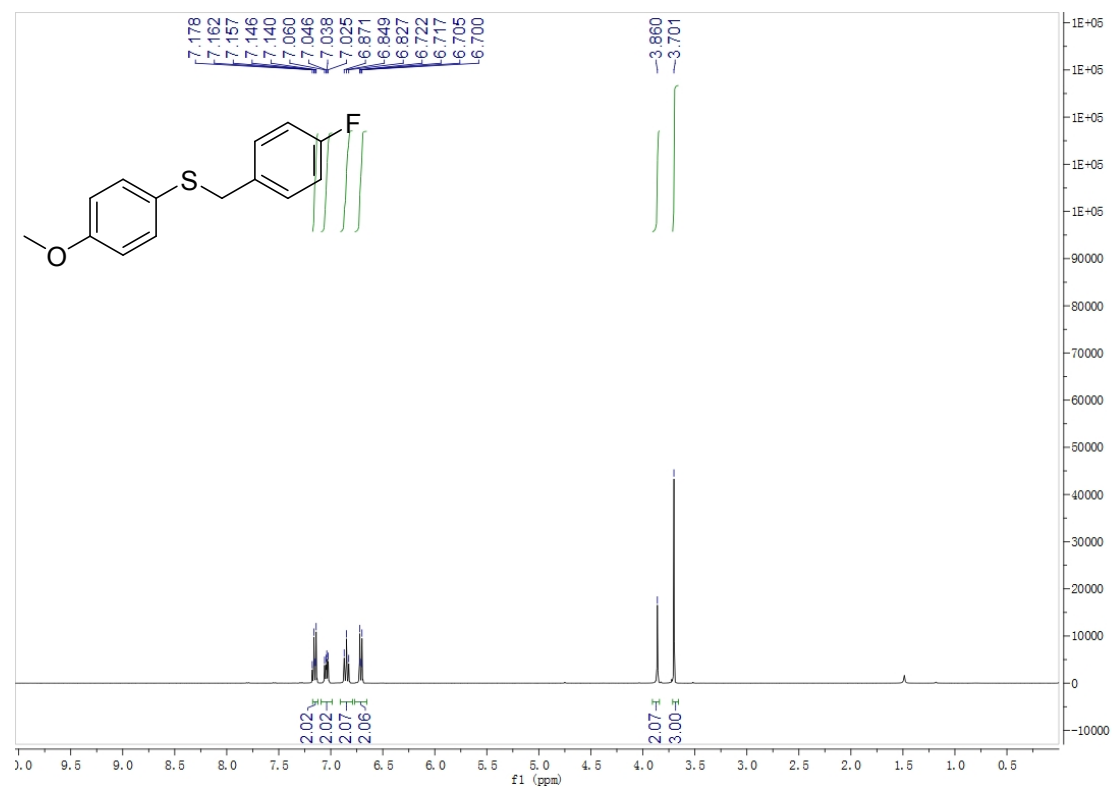

### 3h <sup>13</sup>C NMR

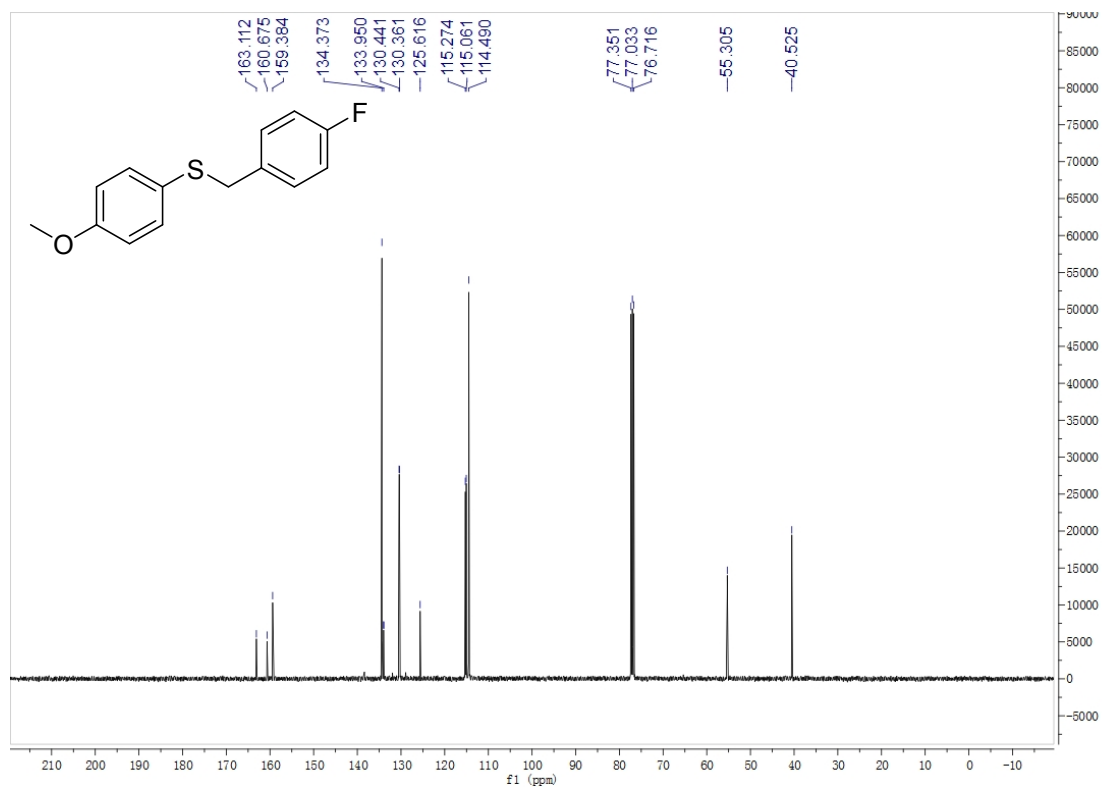

### 3h <sup>19</sup>F NMR

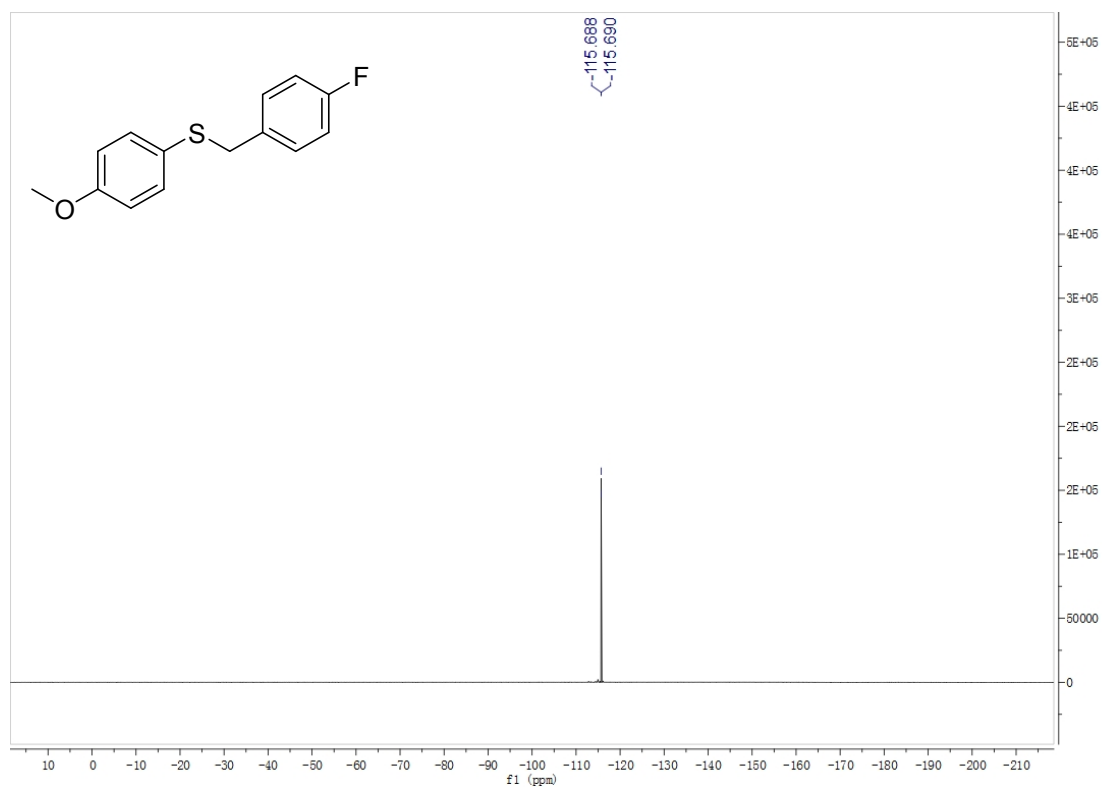

### 3i <sup>1</sup>H NMR

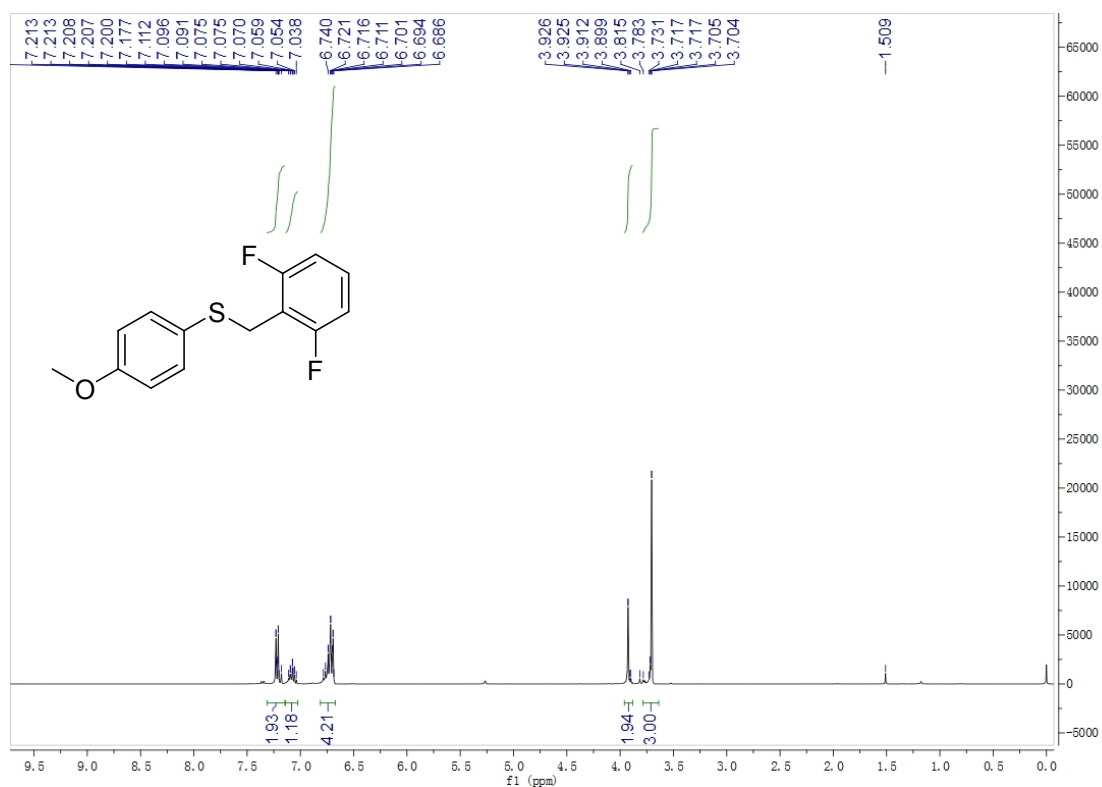

### 3i <sup>13</sup>C NMR

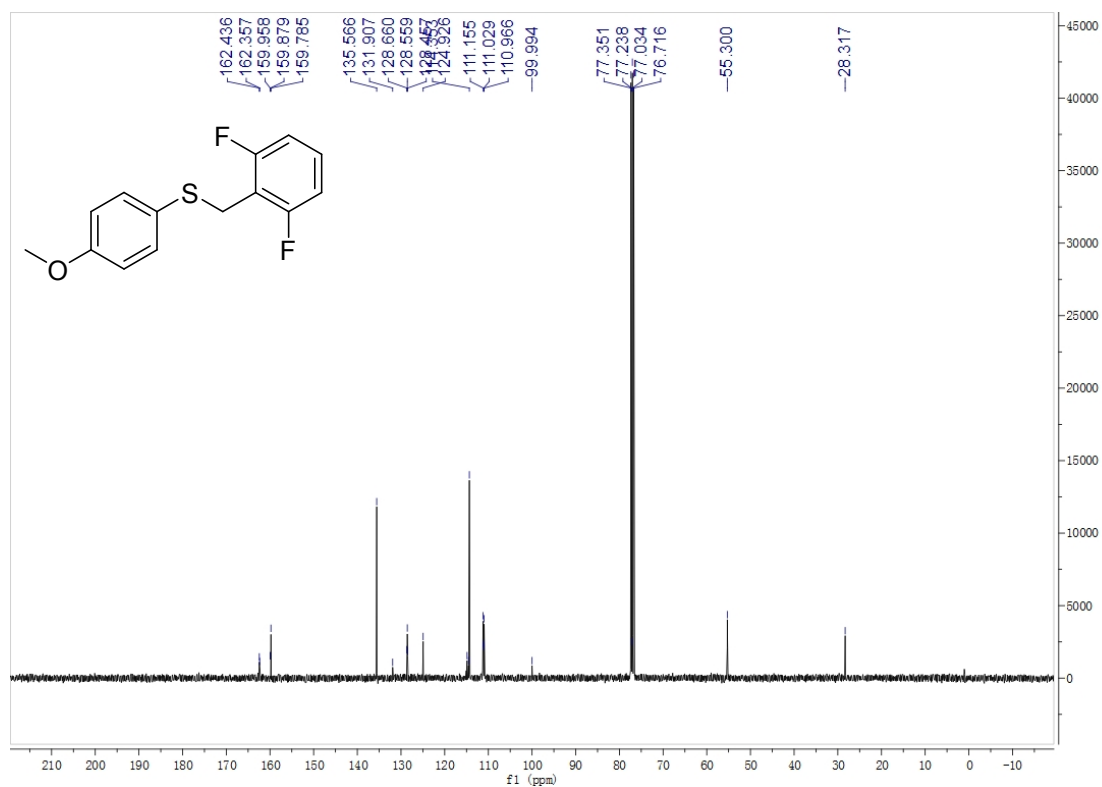

### 3i <sup>19</sup>F NMR

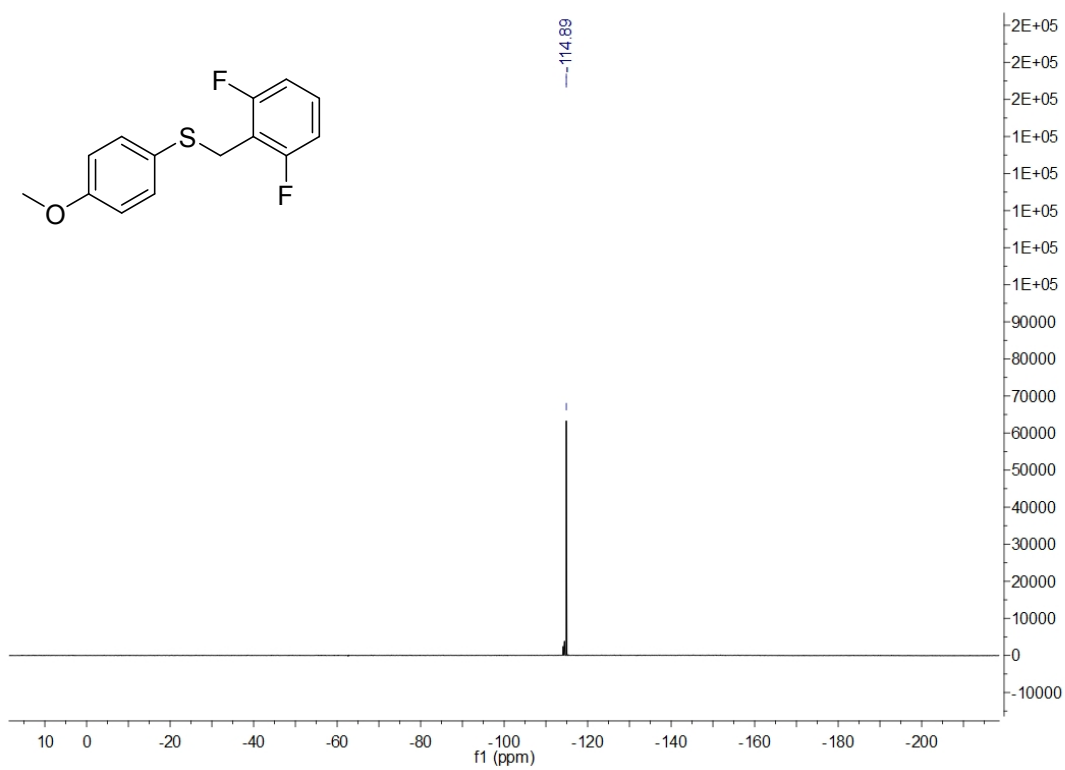

### 3j <sup>1</sup>H NMR

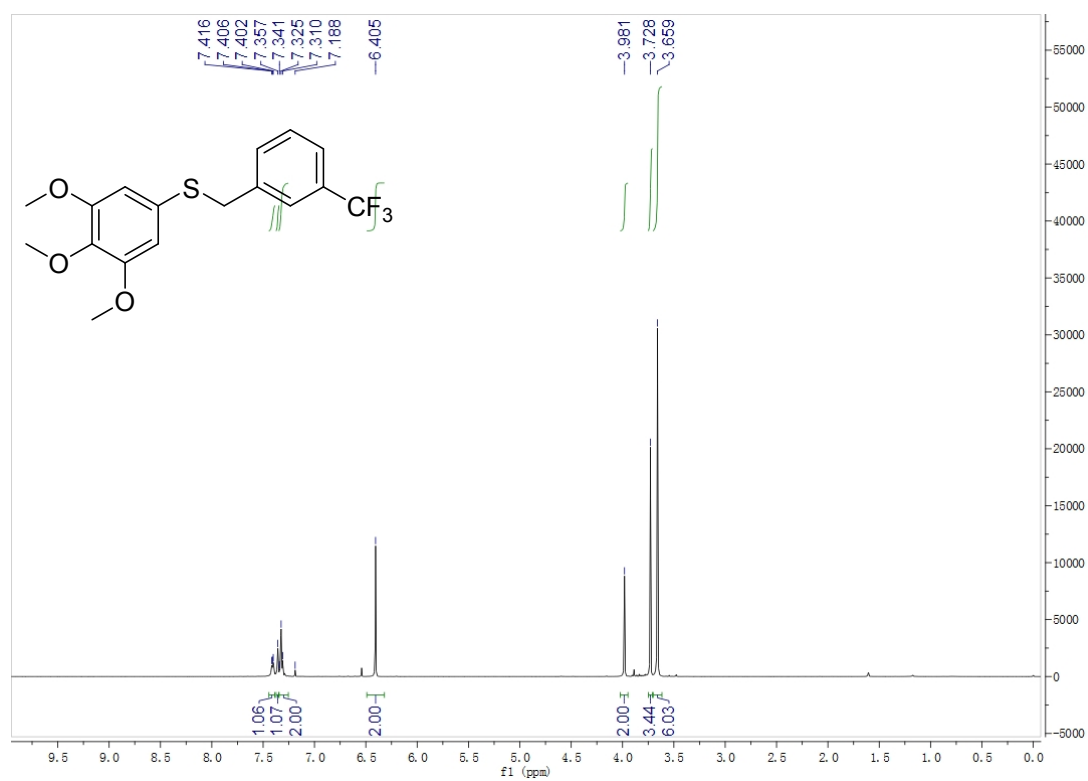

### 3j <sup>13</sup>C NMR

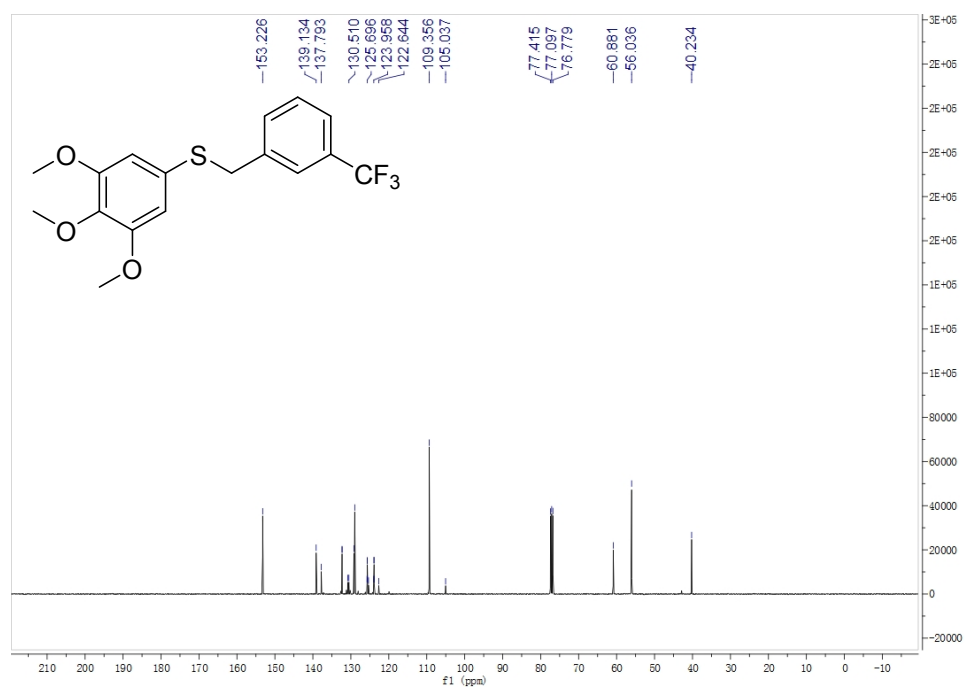

### 3j <sup>19</sup>F NMR

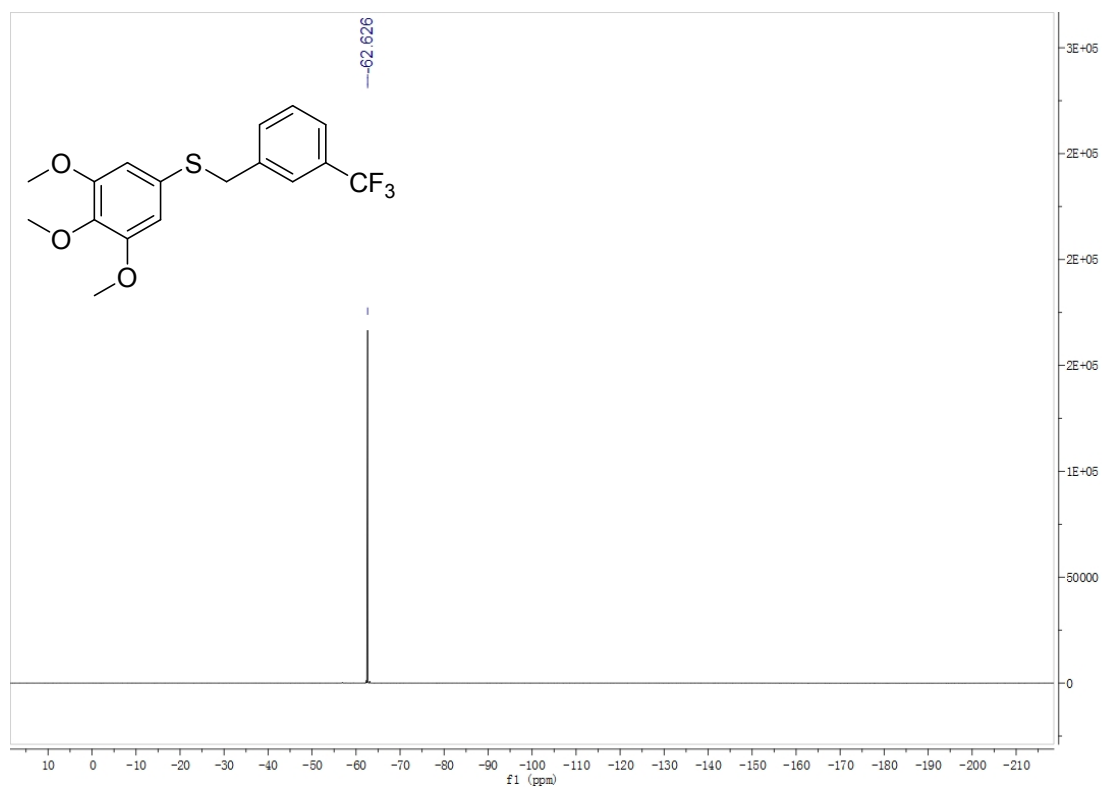

### 3k <sup>1</sup>H NMR

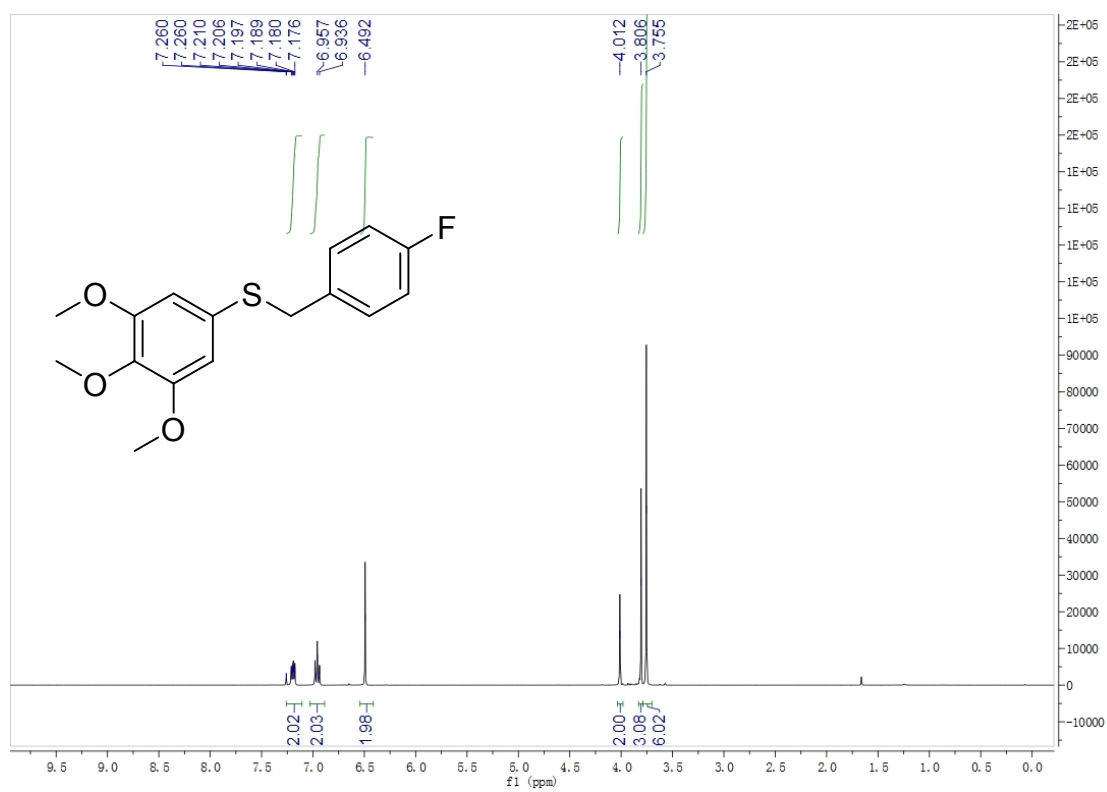

### 3k <sup>13</sup>C NMR

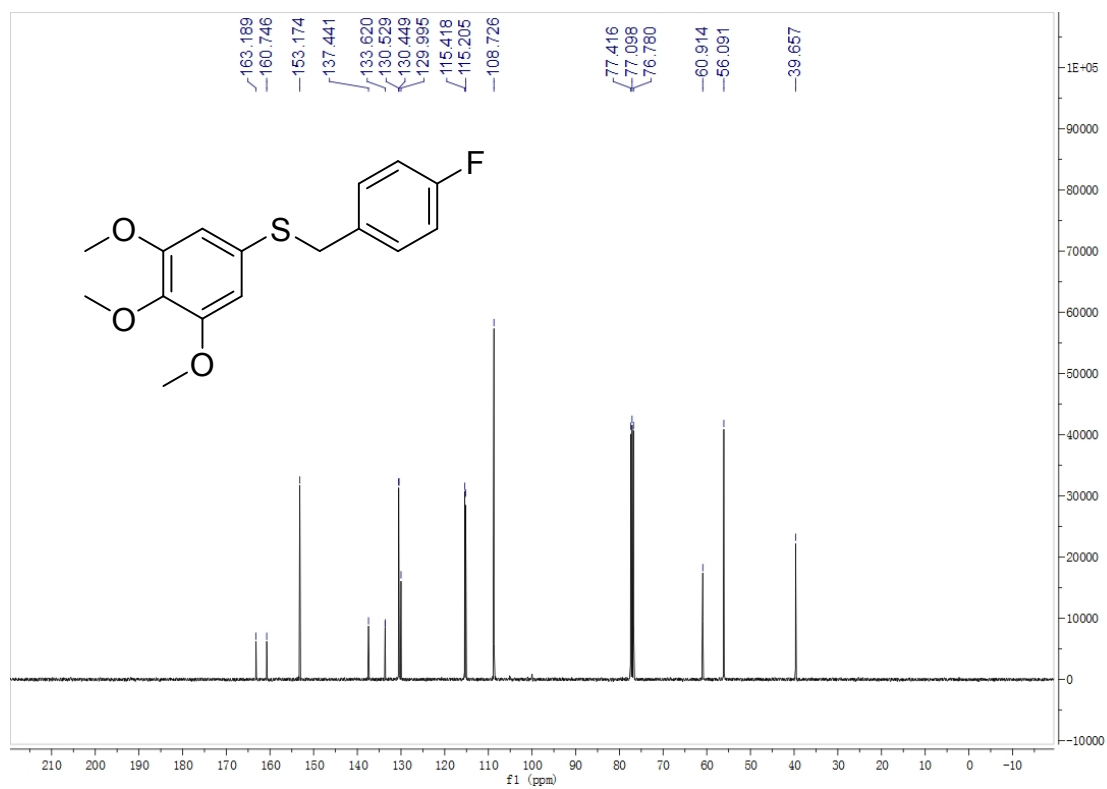

### 3k <sup>19</sup>F NMR

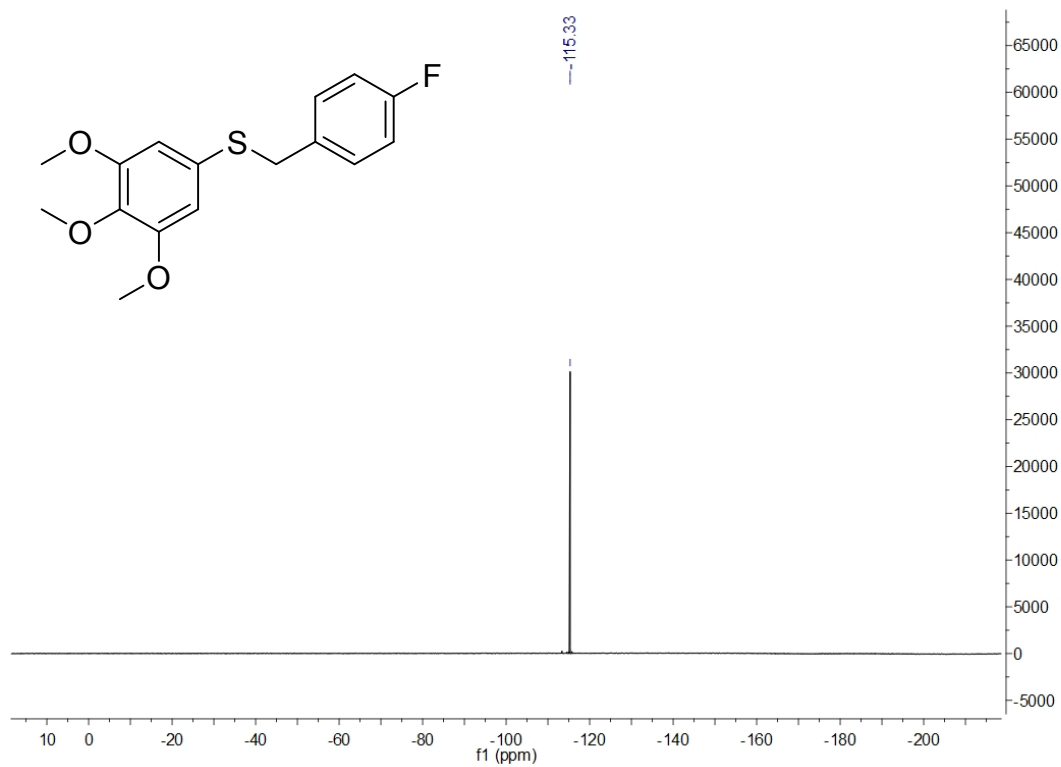

### 31 <sup>1</sup>H NMR

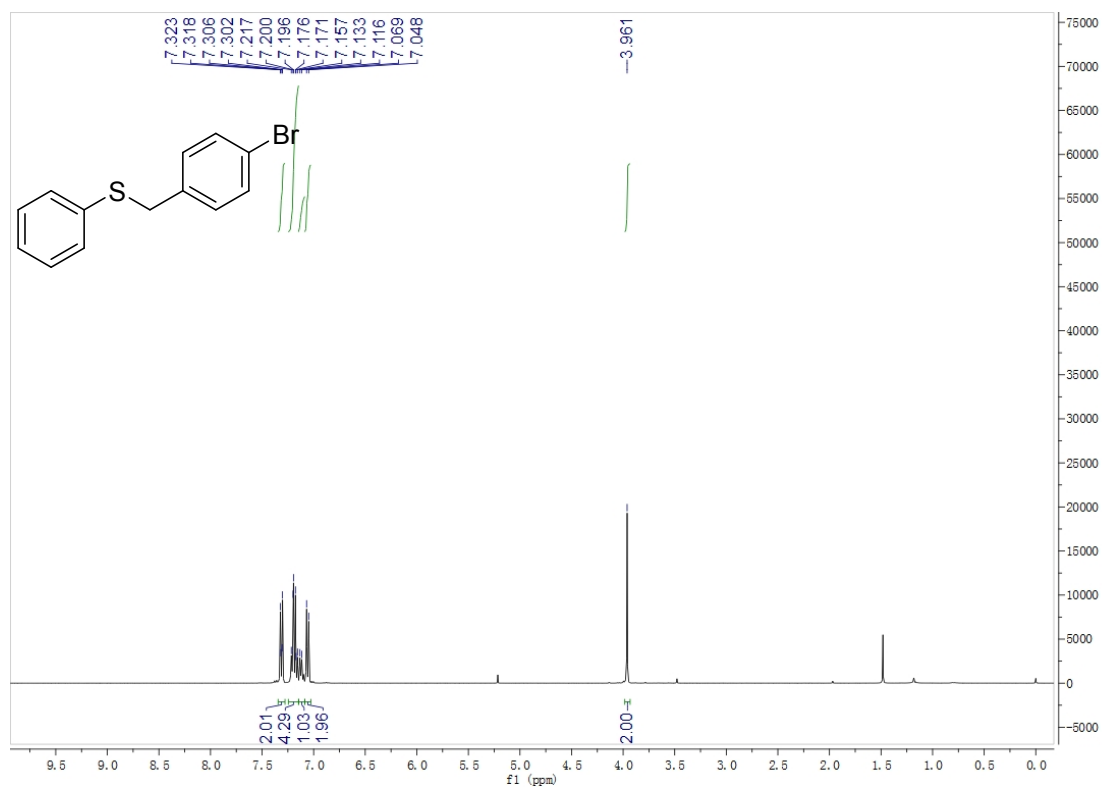

### 31 <sup>13</sup>C NMR

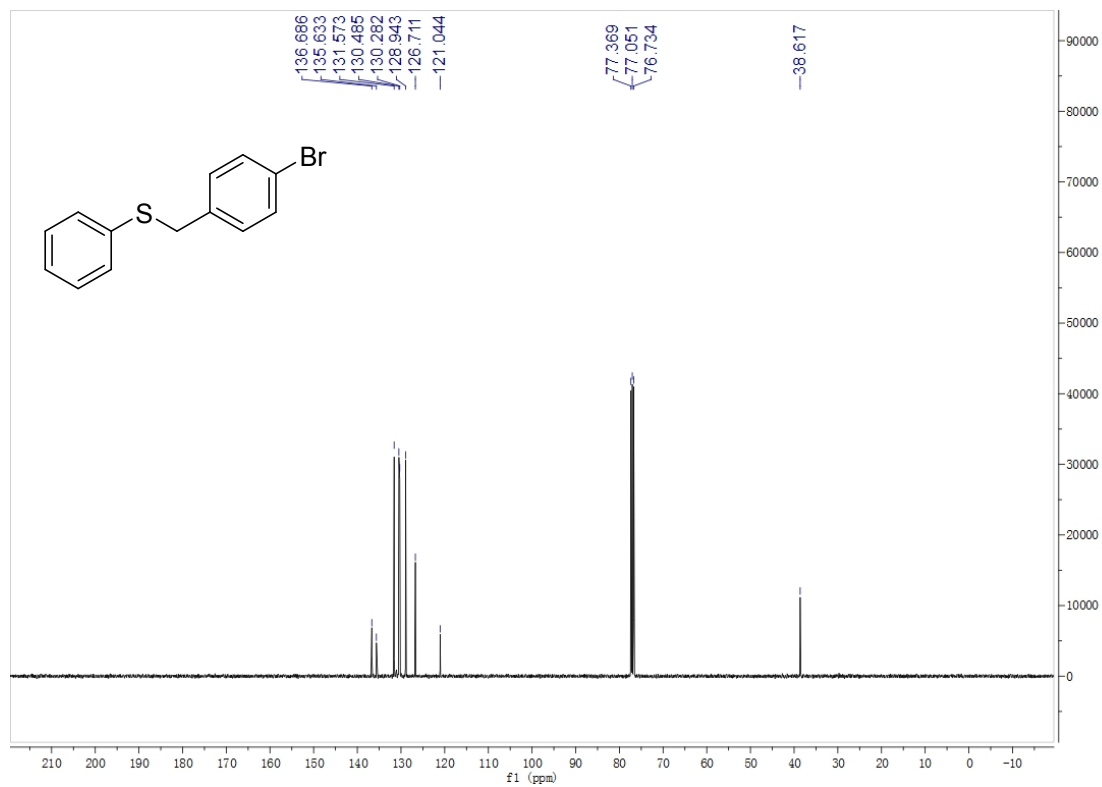



### 3m <sup>1</sup>H NMR

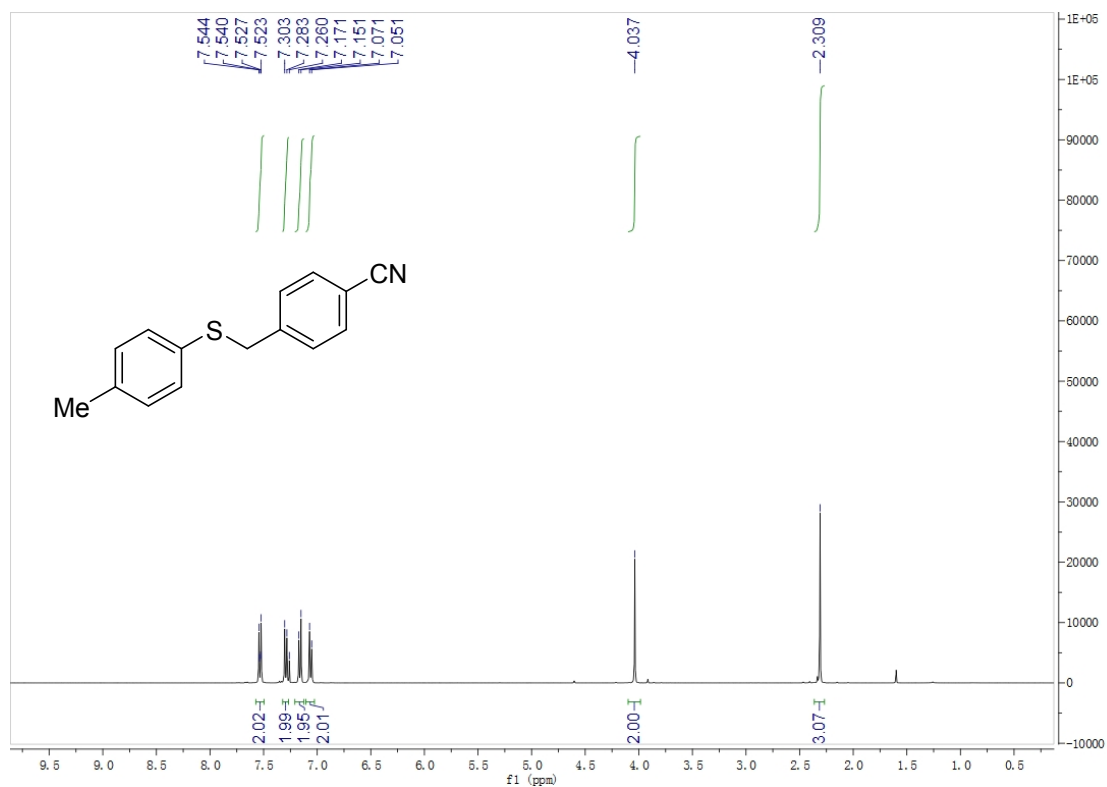

### 3m <sup>13</sup>C NMR

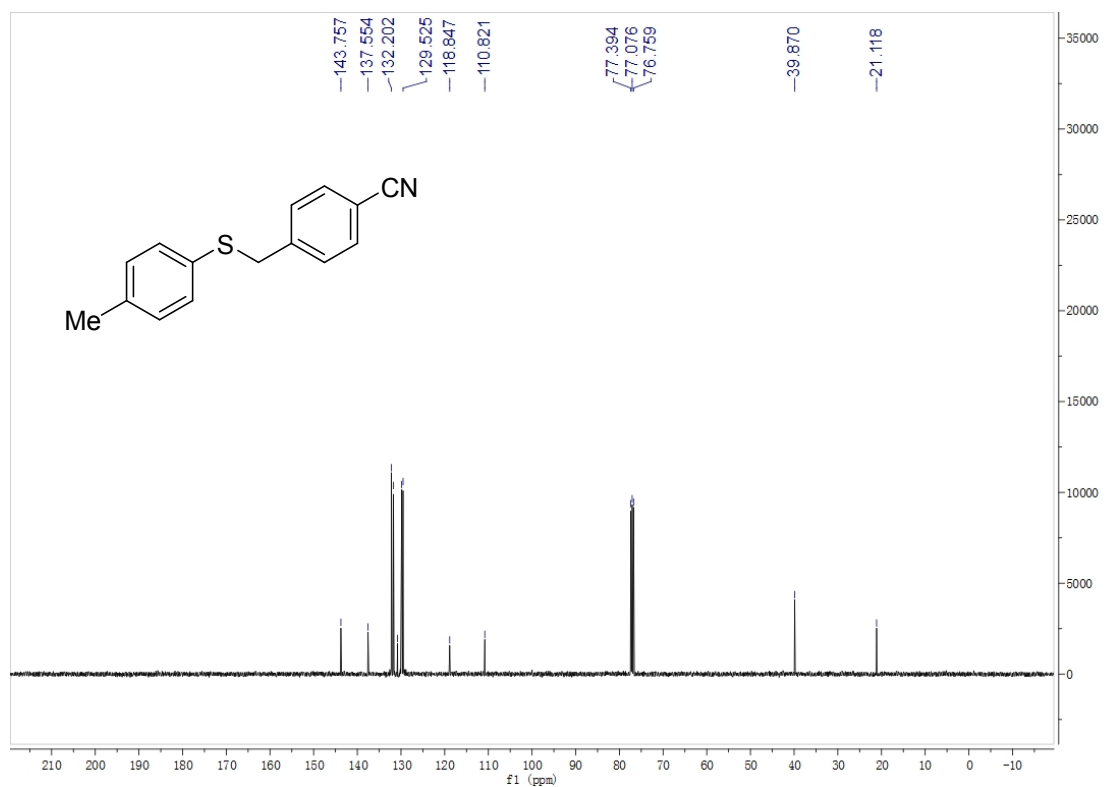

### 3n <sup>1</sup>H NMR

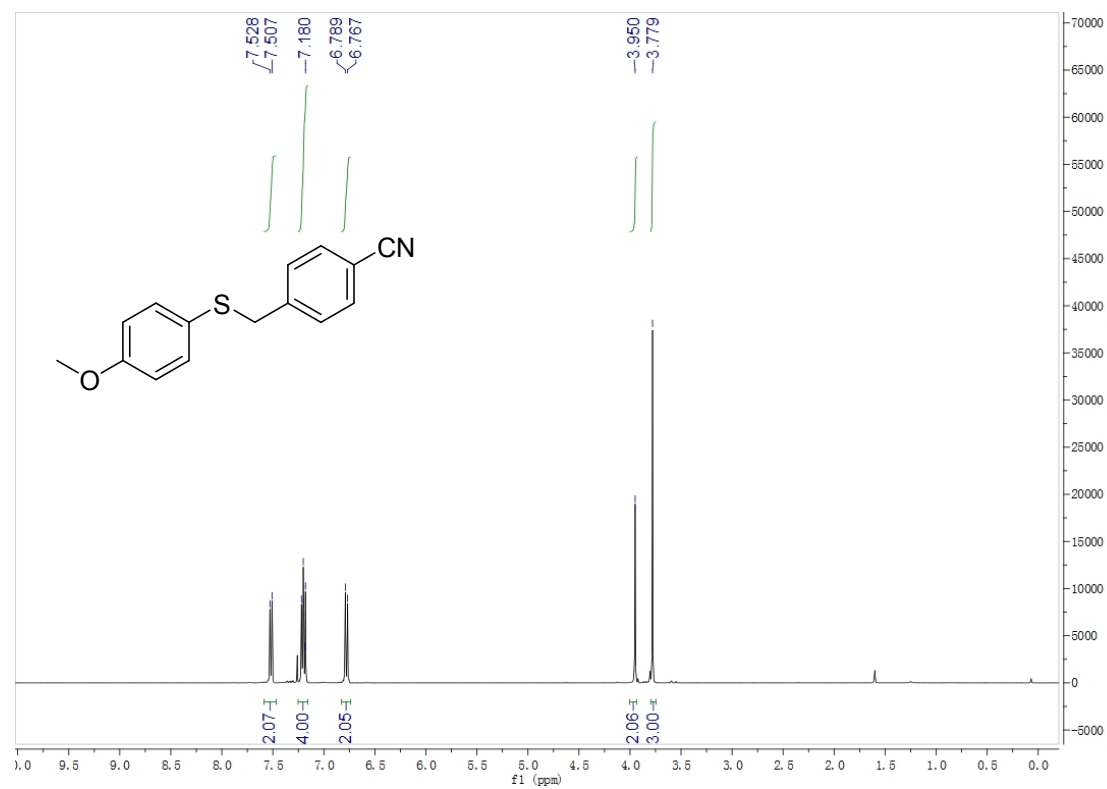

### 3n <sup>13</sup>C NMR

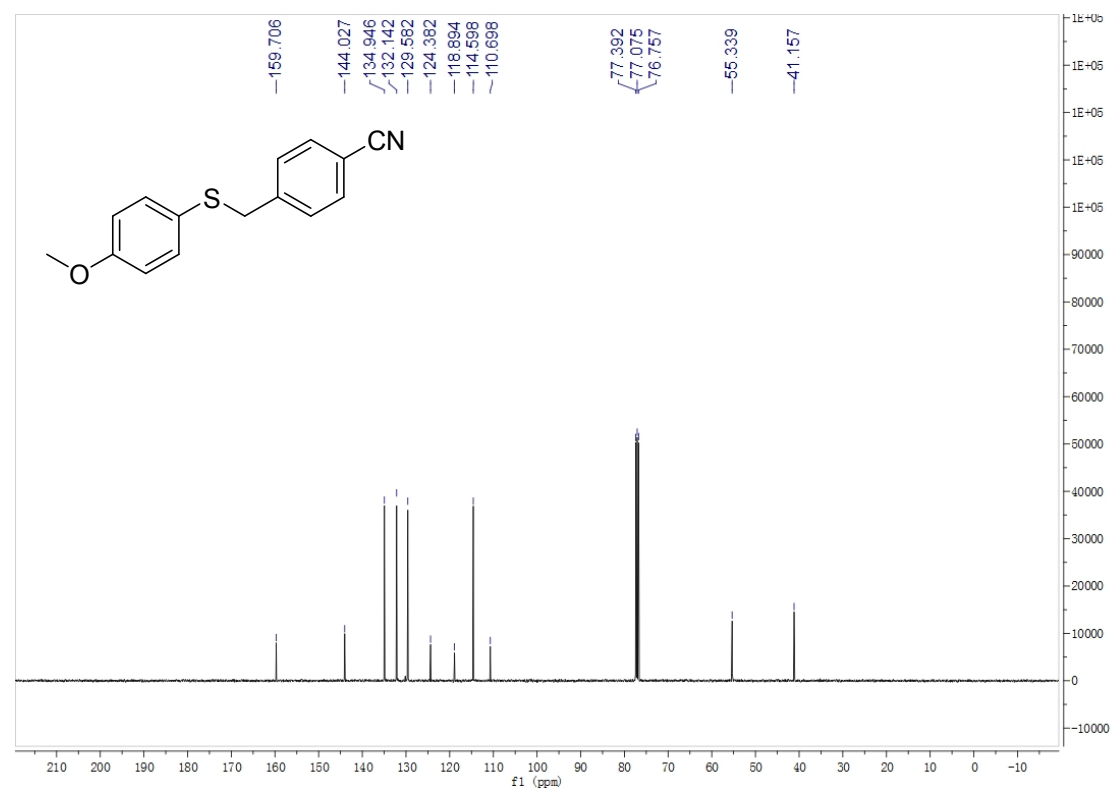

### 3o <sup>1</sup>H NMR

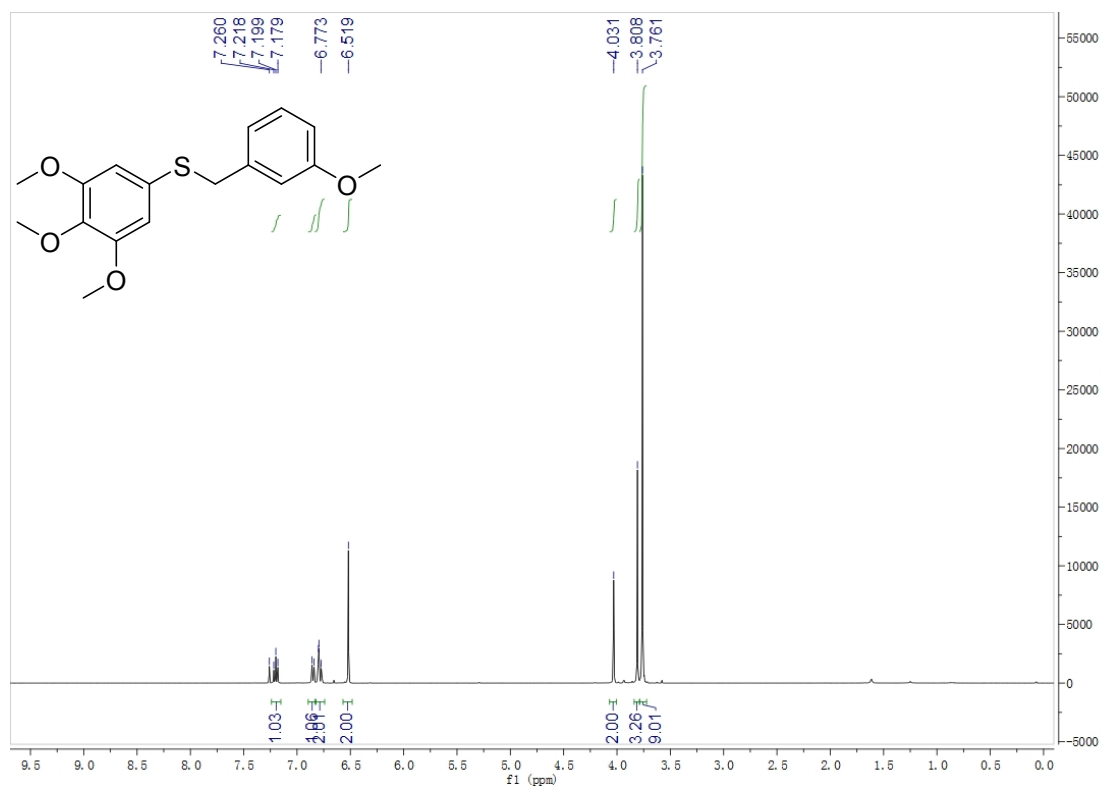

### 3o <sup>13</sup>C NMR

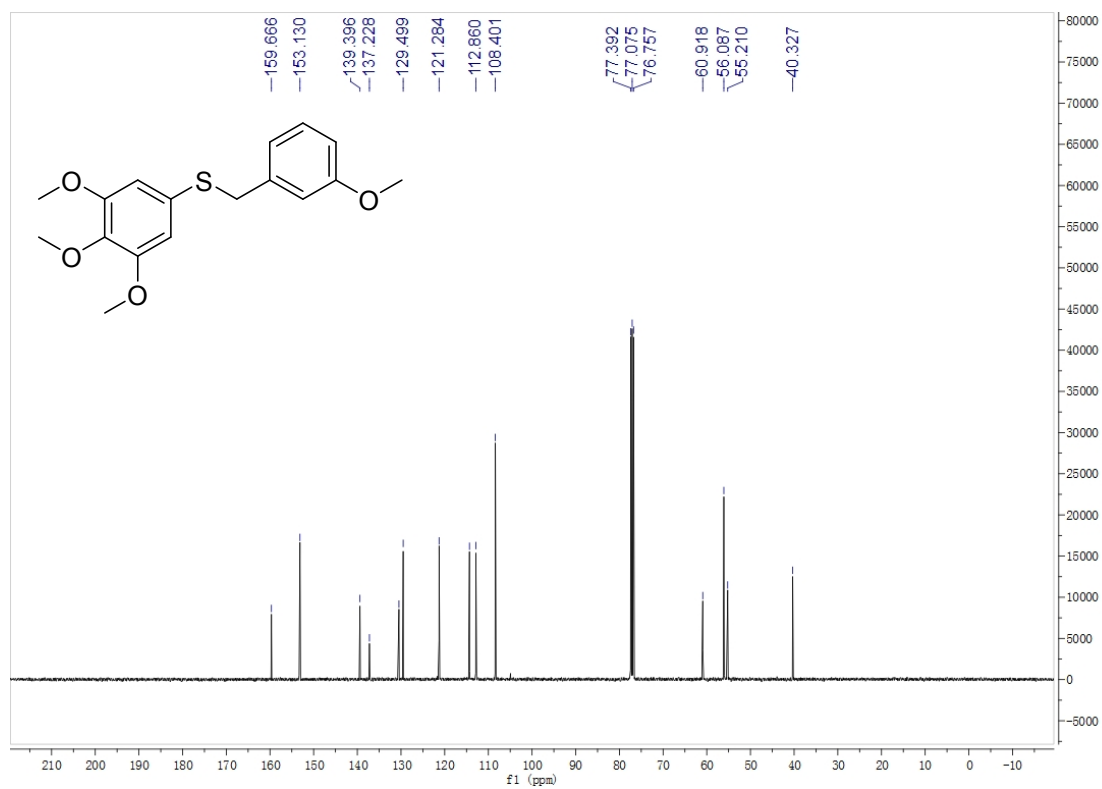

### 3p <sup>1</sup>H NMR

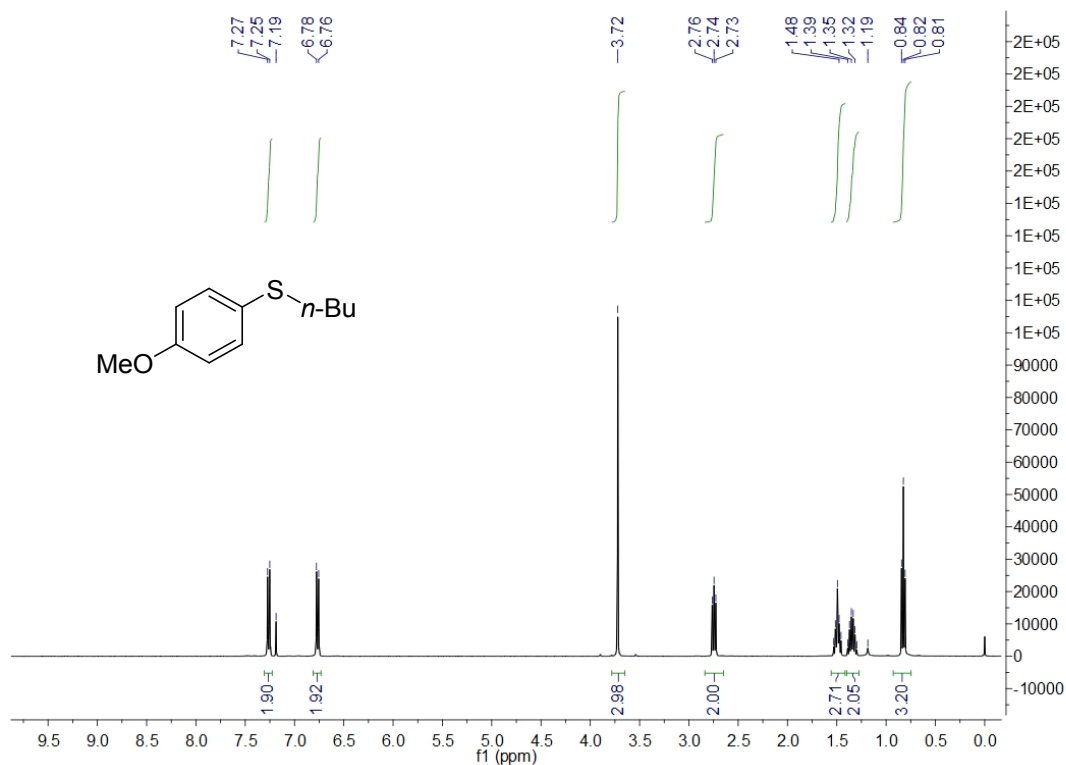

### 3p <sup>13</sup>C NMR

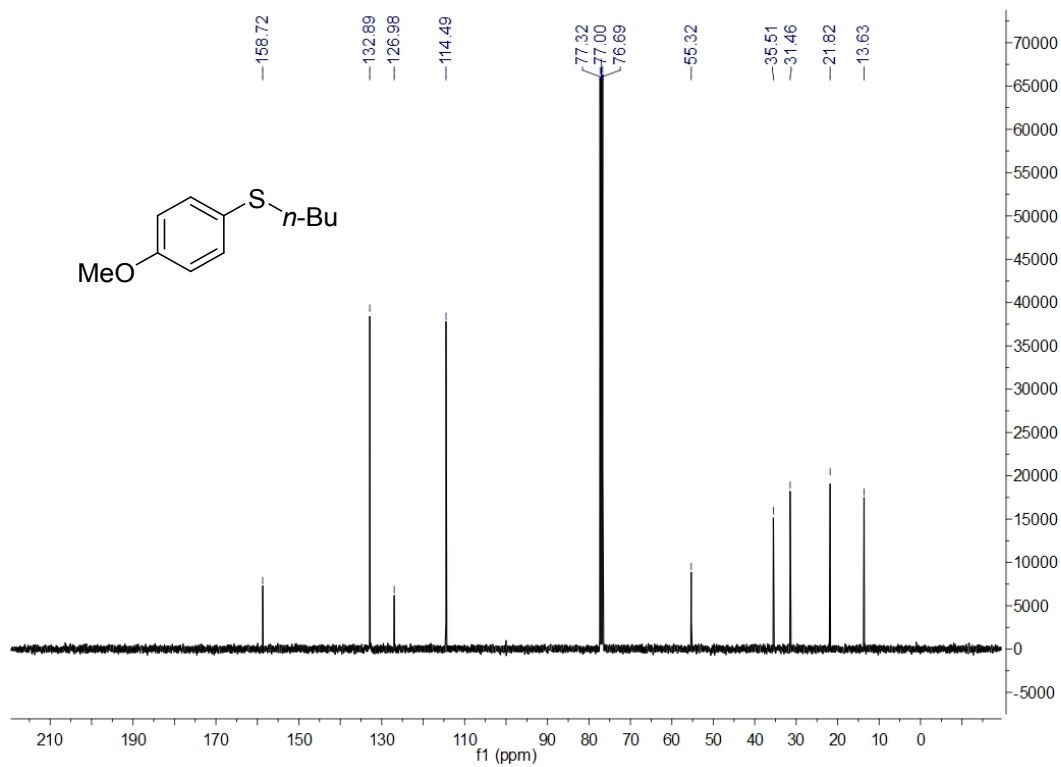

### 3q <sup>1</sup>H NMR

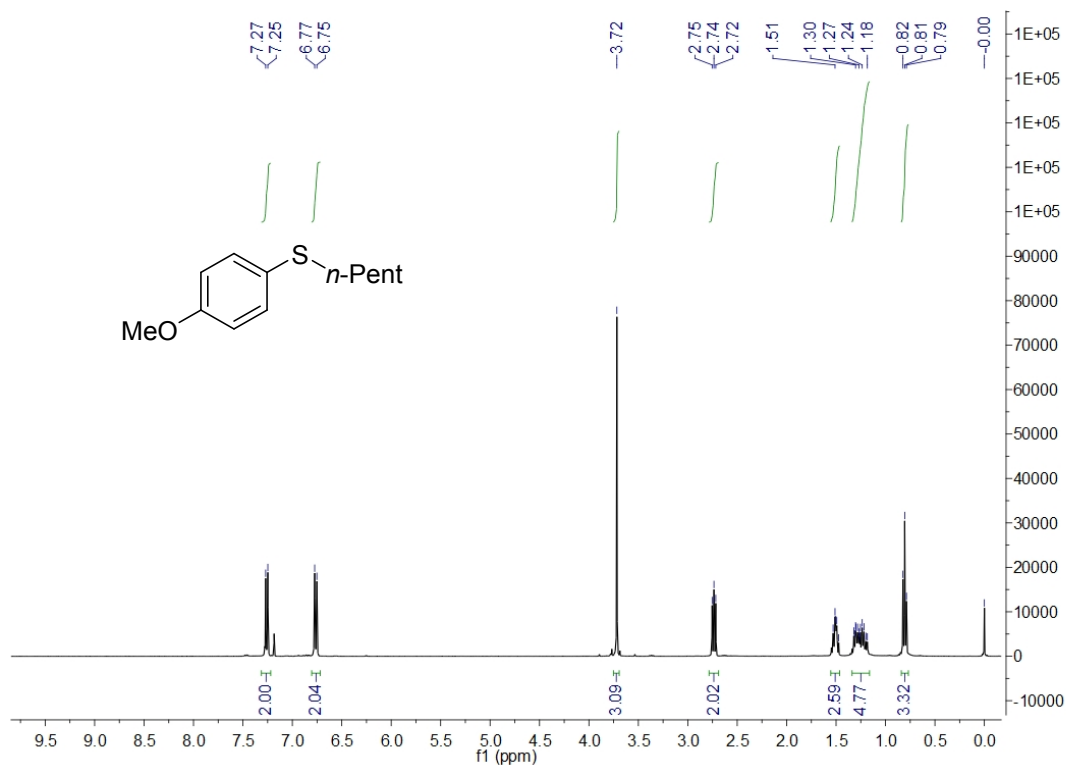

### 3q <sup>13</sup>C NMR

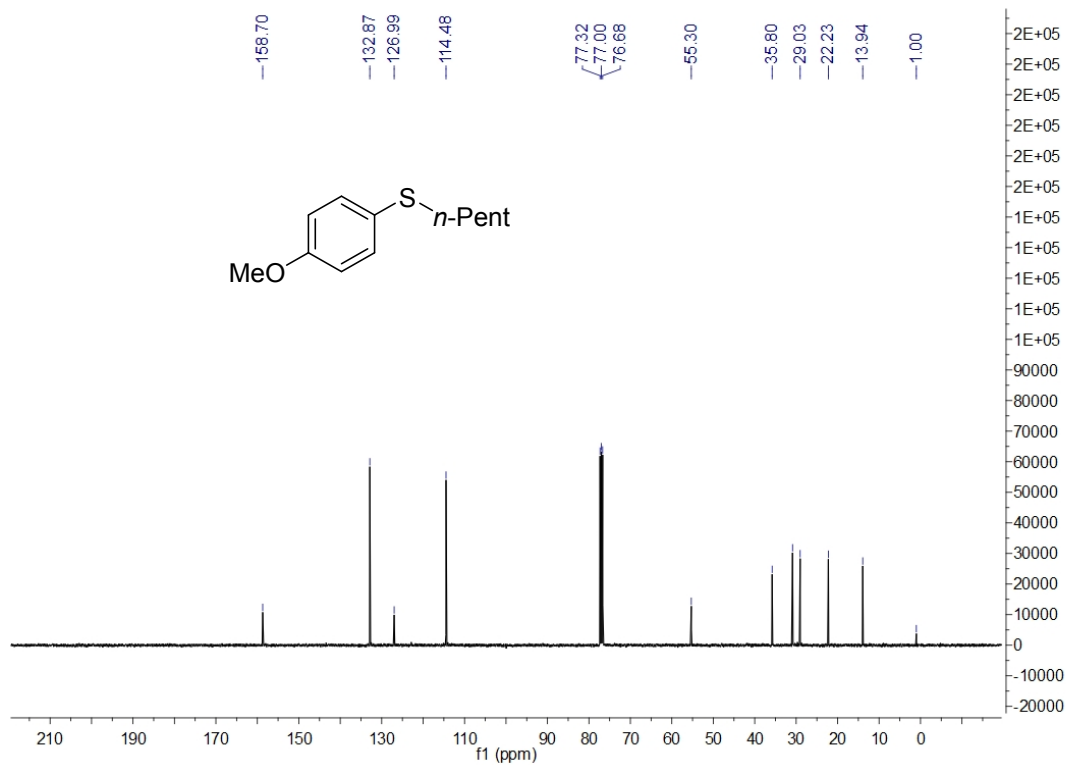

### 3r <sup>1</sup>H NMR

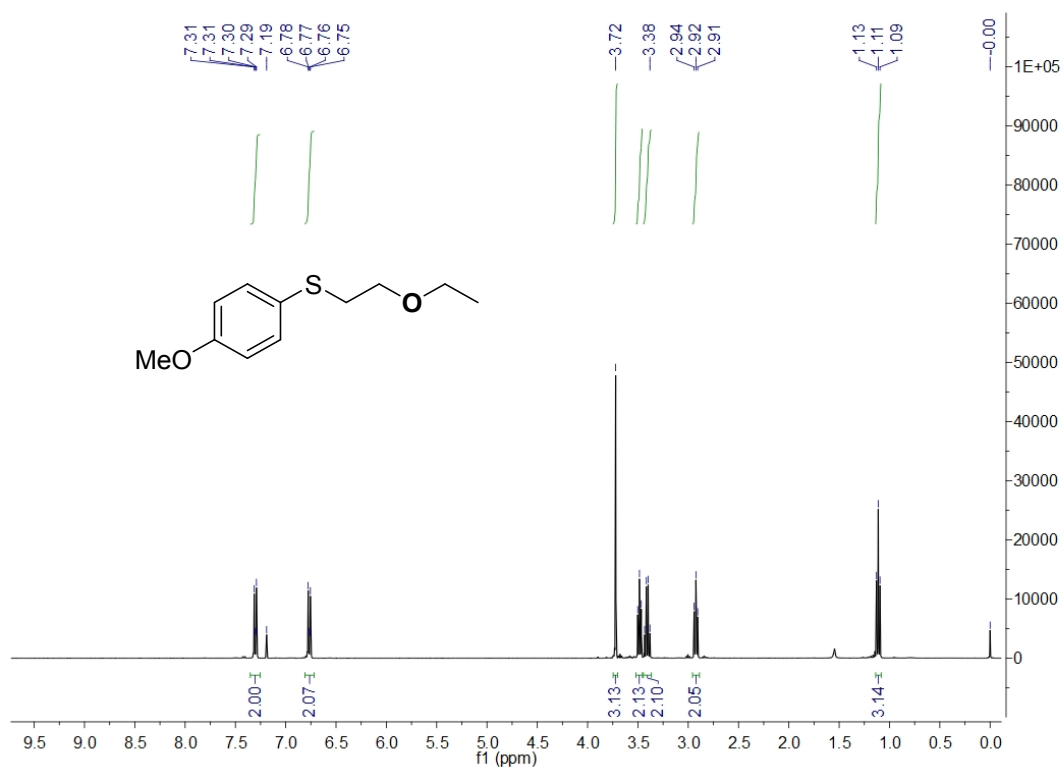

### 3r <sup>13</sup>C NMR

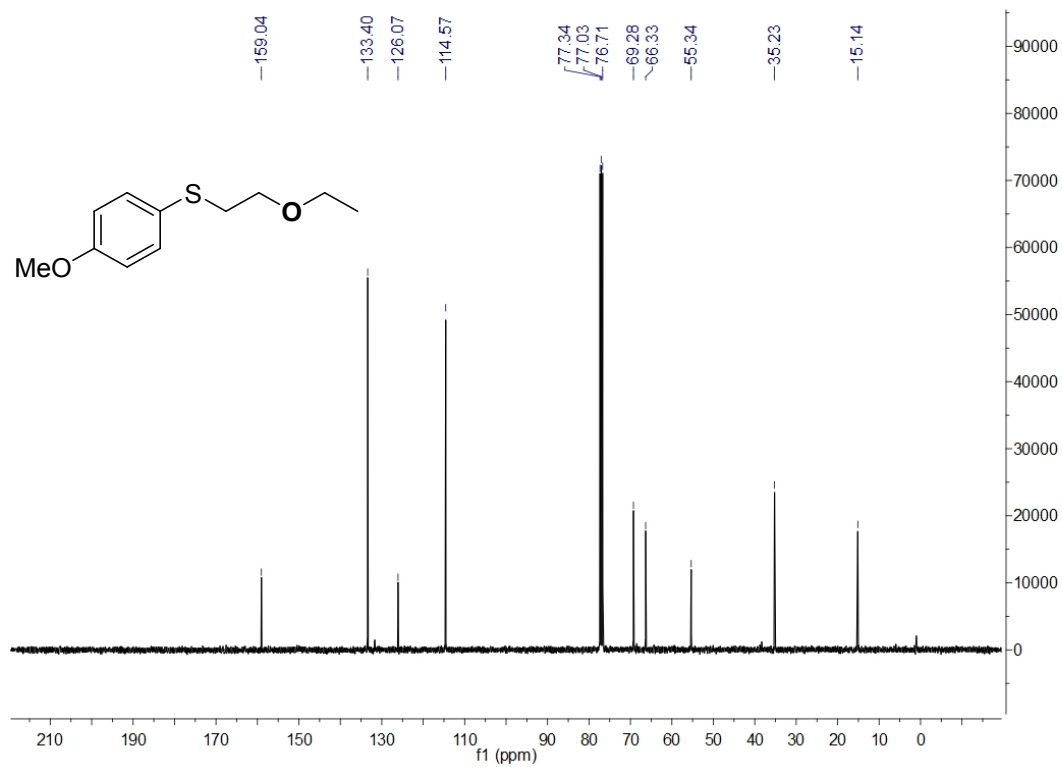

Supplement: c4cc08367a1.pdf [file c4cc08367a1.pdf]
